# Supplementary material for: Circulating tumor DNA sequencing in colorectal cancer patients treated with first-line chemotherapy with anti-EGFR
Source: Sci Rep. 2021 Aug 11;11:16333. doi: 10.1038/s41598-021-95345-4 (PMC8358023; doi:10.1038/s41598-021-95345-4)
Supplement: Supplementary file 2 — Supplementary Table 1. [file 41598_2021_95345_MOESM2_ESM.xlsx]

## Sheet: Suppl. Table 1
ID	baseline (before treatment initiation)			1st response evaluation			disease progression (at PD)			Tissue		PBMC
	Sample ID & acqusition date	Target gene panel	cfDNA (ng/ml)	Sample ID & acqusition date	Target gene panel	cfDNA (ng/ml)	Sample ID & acqusition date	Target gene panel	cfDNA (ng/ml)	Tissue acquisition date	Target gene panel	Target gene panel
CTDC01	CTDC01 2014-09-17	Ver. 3	7.075	CTDC01-2 2014-11-27	Ver. 3	4.8125	CTDC01-5 2015-10-29	Ver. 3	5.15	N/A	N/A	Ver. 3
CTDC02	CTDC02 2014-09-18	Ver. 2	4.85	CTDC02-2 2014-12-04	Ver. 2	2.45	CTDC02-15 2018-07-10	Ver. 3	2.365	2014-08-14	Ver. 2	Ver. 2
CTDC03	CTDC03 2014-12-08	Ver. 2	2.9	CTDC03-2 2015-03-10	Ver. 2	2.95	CTDC03-6 2016-01-28	Ver. 3	17.55	2013-05-22	Ver. 2	Ver. 2
CTDC04	CTDC04 2014-12-09	Ver. 2	5.9	CTDC04-2 2015-02-10	Ver. 2	11.25	CTDC04-3 2015-04-14	Ver. 2	84.15	2014-10-17	Ver. 3	Ver. 2
CTDC05	CTDC05 2015-01-08	Ver. 3	0.415	CTDC05-2 2015-04-01	Ver. 3	5.6875	CTDC05-3 2015-06-30	Ver. 3	NA	2014-12-08	Ver. 3	Ver. 3
CTDC06	CTDC06 2015-02-16	Ver. 2	5.65	CTDC06-2 2015-05-08	Ver. 2	4.35				2014-12-02	Ver. 2	Ver. 2
CTDC07	CTDC07 2015-05-04	Ver. 3	23.125	CTDC07-2 2015-07-27	Ver. 3	2.775	CTDC07-4 2016-01-14	Ver. 3	43.875	N/A	N/A	Ver. 3
CTDC08	CTDC08 2015-05-13	Ver. 2	43	CTDC08-3 2015-07-23	Ver. 2	11.05	CTDC08-8 2016-07-28	Ver. 2	13.95	2015-04-17	Ver. 2	Ver. 2
CTDC09	CTDC09 2015-07-01	Ver. 3	16.875	CTDC09-2 2015-09-08	Ver. 3	7.4625				N/A	N/A	Ver. 3
CTDC10	CTDC10 2015-07-06	Ver. 2	7.35				CTDC10-2 2015-09-14	Ver. 2	NA	N/A	N/A	Ver. 2
CTDC11	CTDC11 2015-07-14	Ver. 2	546.75							2015-06-29	Ver. 3	Ver. 2
CTDC12	CTDC12 2015-08-03	Ver. 2	8.2	CTDC12-2 2015-10-08	Ver. 2	11.75	CTDC12-6 2016-09-23	Ver. 3	14.45	N/A	N/A	Ver. 2
CTDC13	CTDC13 2015-09-22	Ver. 2	8.55	CTDC13-2 2015-11-09	Ver. 2	6.9				2015-09-01	Ver. 2	Ver. 2
CTDC14	CTDC14 2015-10-01	Ver. 2	206.325	CTDC14-2 2015-12-11	Ver. 2	4.85	CTDC14-4 2016-05-31	Ver. 2	17.5	2015-08-25	Ver. 2	Ver. 2
CTDC15	CTDC15 2015-10-12	Ver. 2	6.1	CTDC15-2 2015-12-10	Ver. 2	11	CTDC15-4 2016-04-14	Ver. 2	3.2	2015-09-07	Ver. 2	Ver. 2
CTDC16	CTDC16 2015-12-08	Ver. 2	6.55	CTDC16-2 2016-02-15	Ver. 2	5	CTDC16-4 2016-07-15	Ver. 3	2.62	2014-08-27	Ver. 3	Ver. 2
CTDC17	CTDC17 2016-01-19	Ver. 2	3.85	CTDC17-2 2016-04-08	Ver. 2	3.3	CTDC17-6 2017-03-09	Ver. 3	0.422	2015-12-23	Ver. 2	Ver. 2
CTDC18	CTDC18 2016-03-03	Ver. 2	3.85	CTDC18-2 2016-05-19	Ver. 2	13.15				2016-01-20	Ver. 2	Ver. 2
CTDC19	CTDC19 2016-03-08	Ver. 2	3.6	CTDC19-2 2016-05-13	Ver. 2	4				2016-01-20	Ver. 2	Ver. 2
CTDC20	CTDC20 2016-03-14	Ver. 2	111.825	CTDC20-2 2016-05-10	Ver. 2	6.15	CTDC20-5 2016-11-01	Ver. 3	9.995	2016-02-19	Ver. 2	Ver. 2
CTDC21	CTDC21 2016-03-14	Ver. 2	4.45	CTDC21-2 2016-05-17	Ver. 2	2.65	CTDC21-5 2016-12-08	Ver. 3	10.5	2016-02-16	Ver. 2	Ver. 2
CTDC22	CTDC22 2016-03-30	Ver. 3	7.375	CTDC22-2 2016-05-24	Ver. 3	3.2875				N/A	N/A	Ver. 3
CTDC23	CTDC23 2016-03-30	Ver. 3	3.825	CTDC23-2 2016-05-26	Ver. 3	5.95	CTDC23-3 2016-07-26	Ver. 3	4.6	N/A	N/A	Ver. 3
CTDC24	CTDC24 2016-04-14	Ver. 2	5.25	CTDC24-2 2016-06-10	Ver. 2	2.9	CTDC24-4 2016-10-14	Ver. 3	7.935	2016-03-24	Ver. 2	Ver. 2
CTDC25	CTDC25 2016-04-27	Ver. 2	53.35	CTDC25-2 2016-06-30	Ver. 2	9.2				2016-04-12	Ver. 2	Ver. 2
CTDC26	CTDC26 2016-04-28	Ver. 2	3.5	CTDC26-2 2016-06-30	Ver. 2	NA	CTDC26-3 2016-09-08	Ver. 3	10.45	2016-03-29	Ver. 3	Ver. 2
CTDC27	CTDC27 2016-06-28	Ver. 2	5.9	CTDC27-2 2016-09-01	Ver. 2	4.55	CTDC27-7 2018-01-04	Ver. 3	17.75	N/A	N/A	Ver. 2
CTDC28	CTDC28 2016-07-08	Ver. 2	8.35	CTDC28-2 2016-09-01	Ver. 2	11.9	CTDC28-8 2017-11-28	Ver. 3	21.35	2016-06-22	Ver. 2	Ver. 2
CTDC29	CTDC29 2016-08-10	Ver. 2	6.15	CTDC29-2 2016-10-18	Ver. 3	5.025	CTDC29-4 2017-02-14	Ver. 3	12.34	2013-12-11	Ver. 2	Ver. 2
CTDC30	CTDC30 2016-09-12	Ver. 3	20.5	CTDC30-2 2016-12-08	Ver. 3	4.625	CTDC30-3 2017-10-19	Ver. 3	13.7	N/A	N/A	Ver. 3
CTDC31	CTDC31 2016-09-12	Ver. 3	8.0625	CTDC31-2 2016-11-17	Ver. 3	9.8625	CTDC31-6 2017-07-25	Ver. 3	10.98	N/A	N/A	Ver. 3
CTDC32	CTDC32 2016-09-30	Ver. 3	3.425	CTDC32-2 2016-12-08	Ver. 3	4.875	CTDC32-4 2017-03-30	Ver. 3	NA	N/A	N/A	Ver. 3
CTDC33	CTDC33 2016-10-20	Ver. 3	11.5375	CTDC33-2 2016-12-30	Ver. 3	15.625	CTDC33-3 2017-02-21	Ver. 3	77	N/A	N/A	Ver. 3
CTDC34	CTDC34 2016-10-20	Ver. 3	6.125	CTDC34-2 2016-12-23	Ver. 3	14.5	CTDC34-7 2017-11-23	Ver. 3	9.15	2015-08-11	Ver. 3	Ver. 3
CTDC35	CTDC35 2016-10-21	Ver. 3	136.25	CTDC35-2 2016-12-26	Ver. 3	23.25				2016-09-27	Ver. 3	Ver. 3
CTDC36	CTDC36 2016-11-01	Ver. 3	7.3625	CTDC36-2 2016-12-30	Ver. 3	6.5875	CTDC36-3 2017-03-09	Ver. 3	NA	2016-10-12	Ver. 3	Ver. 3
CTDC37	CTDC37 2016-11-25	Ver. 3	8.4	CTDC37-2 2017-02-02	Ver. 3	6.6625				2016-11-07	Ver. 3	Ver. 3
CTDC38	CTDC38 2016-12-01	Ver. 3	27.75	CTDC38-2 2017-01-31	Ver. 3	5.5	CTDC38-5 2017-07-20	Ver. 3	9.625	2016-11-22	Ver. 3	Ver. 3
CTDC39	CTDC39 2016-12-09	Ver. 3	19.2	CTDC39-3 2017-02-23	Ver. 3	4.85	CTDC39-6 2017-10-26	Ver. 3	8.15	2016-11-15	Ver. 3	Ver. 3
CTDC40	CTDC40 2017-01-03	Ver. 3	10.15	CTDC40-2 2017-04-27	Ver. 3	6.05	CTDC40-3 2017-07-14	Ver. 3	12.05	2016-12-02	Ver. 3	N/A
CTDC41	CTDC41 2017-01-10	Ver. 3	20	CTDC41-2 2017-03-21	Ver. 3	7.525	CTDC41-3 2017-07-27	Ver. 3	71	2016-12-14	Ver. 3	Ver. 3
CTDC42	CTDC42 2017-02-20	Ver. 3	1.5875	CTDC42-2 2017-04-06	Ver. 3	2.3875	CTDC42-11 2018-10-30	Ver. 3	0.272	2017-01-23	Ver. 3	Ver. 3
CTDC43	CTDC43 2017-02-20	Ver. 2	4.8125	CTDC43-2 2017-04-18	Ver. 3	3.7375	CTDC43-6 2018-05-10	Ver. 3	13.2	2017-01-24	Ver. 3	Ver. 3
CTDC44	CTDC44 2017-02-28	Ver. 3	6.9875	CTDC44-2 2017-05-18	Ver. 3	2.8625	CTDC44-3 2017-08-17	Ver. 3	10.075	N/A	N/A	Ver. 3
CTDC45	CTDC45 2017-03-23	Ver. 3	316.25				CTDC45-2 2017-05-23	Ver. 3	138.5	2017-02-28	Ver. 3	Ver. 3
CTDC46	CTDC46 2017-03-28	Ver. 3	16.625	CTDC46-2 2017-05-30	Ver. 3	5.75	CTDC46-10 2019-03-14	Ver. 3	10	2017-02-22	Ver. 3	Ver. 3
CTDC47	CTDC47 2017-04-05	Ver. 3	23.5	CTDC47-2 2017-06-20	Ver. 3	7.35				2017-03-06	Ver. 3	Ver. 3
CTDC48	CTDC48 2017-05-11	Ver. 3	8.2	CTDC48-2 2017-07-06	Ver. 3	3.99	CTDC48-9 2018-11-30	Ver. 3	11.05	2014-10-13	Ver. 3	Ver. 3
CTDC49	CTDC49 2017-06-22	Ver. 3	11.2							N/A	N/A	Ver. 3
CTDC50	CTDC50 2017-07-27	Ver. 3	26.8	CTDC50-2 2018-01-11	Ver. 3	20.75	CTDC50-3 2018-04-05	Ver. 3	11.1	N/A	N/A	Ver. 3
CTDC51	CTDC51 2017-07-28	Ver. 3	74	CTDC51-2 2017-12-14	Ver. 3	24.4				N/A	N/A	Ver. 3
CTDC52	CTDC52 2017-08-10	Ver. 3	14.95	CTDC52-2 2017-10-26	Ver. 3	2.81	CTDC52-9 2019-04-24	Ver. 3	1.725	2016-01-18	Ver. 3	Ver. 3
CTDC53	CTDC53 2017-08-25	Ver. 3	11.6	CTDC53-2 2017-11-03	Ver. 3	2.895	CTDC53-5 2018-03-09	Ver. 3	26.75	N/A	N/A	Ver. 3
CTDC54	CTDC54 2017-08-31	Ver. 3	11.6	CTDC54-2 2017-11-21	Ver. 3	5.6				2017-08-04	Ver. 3	Ver. 3
CTDC55	CTDC55-2 2017-11-13	Ver. 3	21.25	CTDC55-3 2018-01-11	Ver. 3	38.3				2017-10-16	Ver. 3	Ver. 3
CTDC56	CTDC56 2017-11-14	Ver. 3	72.5	CTDC56-2 2018-01-18	Ver. 3	15.1	CTDC56-8 2018-11-22	Ver. 3	18.45	N/A	N/A	Ver. 3
CTDC57	CTDC57 2018-01-05	Ver. 3	40.25	CTDC57-2 2018-03-15	Ver. 3	1.405	CTDC57-5 2019-02-21	Ver. 3	30.8	2017-12-12	Ver. 3	Ver. 3
CTDC58	CTDC58 2018-01-09	Ver. 3	2.785	CTDC58-2 2018-03-23	Ver. 3	11.2	CTDC58-5 2019-03-29	Ver. 3	0.88	N/A	N/A	Ver. 3
CTDC59	CTDC59 2018-03-23	Ver. 3	540	CTDC59-2 2018-06-07	Ver. 3	26.6				N/A	N/A	Ver. 3
CTDC60	CTDC60 2018-04-13	Ver. 3	319	CTDC60-2 2018-06-29	Ver. 3	9.5				N/A	N/A	Ver. 3
CTDC61	CTDC61 2018-04-24	Ver. 3	5.6	CTDC61-2 2018-07-06	Ver. 3	20.35	CTDC61-6 2019-05-28	Ver. 3	111.5	2018-04-05	Ver. 3	Ver. 3
CTDC62	CTDC62 2018-04-26	Ver. 3	18.8	CTDC62-2 2018-07-12	Ver. 3	21.45				2017-05-31	Ver. 3	Ver. 3
CTDC63	CTDC63 2018-05-24	Ver. 3	20.55	CTDC63-2 2018-07-06	Ver. 3	1.105				2018-04-23	Ver. 3	Ver. 3
CTDC64	CTDC64 2018-06-14	Ver. 3	81.5	CTDC64-2 2018-09-04	Ver. 3	15.8				2018-05-17	Ver. 3	Ver. 3
CTDC65	CTDC65 2018-06-22	Ver. 3	775	CTDC65-2 2018-08-23	Ver. 3	115.5				N/A	N/A	Ver. 3
CTDC66	CTDC66 2018-07-19	Ver. 3	45.5	CTDC66-2 2018-09-27	Ver. 3	8.125				2018-07-03	Ver. 3	Ver. 3
CTDC67	CTDC67 2018-07-20	Ver. 3	61.5	CTDC67-2 2018-10-04	Ver. 3	14.95				2017-06-15	Ver. 3	Ver. 3
CTDC68	CTDC68-2 2018-07-31	Ver. 3	15.9	CTDC68-3 2018-09-27	Ver. 3	18.5	CTDC68-6 2019-08-14	Ver. 3	10.4	2018-06-25	Ver. 3	Ver. 3
CTDC69	CTDC69 2018-08-07	Ver. 3	5.375	CTDC69-2 2018-10-17	Ver. 3	7.775	CTDC69-6 2019-06-27	Ver. 3	6.075	2018-07-16	Ver. 3	Ver. 3
CTDC70	CTDC70 2018-08-18	Ver. 3	134.5	CTDC70-2 2018-10-18	Ver. 3	62	CTDC70-5 2019-07-09	Ver. 3	244	N/A	N/A	Ver. 3
CTDC71	CTDC71 2018-09-06	Ver. 3	16.1	CTDC71-2 2018-12-17	Ver. 3	21.5	CTDC71-5 2019-07-12	Ver. 3	23.05	2018-08-02	Ver. 3	Ver. 3
CTDC72	CTDC72 2018-11-26	Ver. 3	12.65	CTDC72-2 2019-02-21	Ver. 3	12.075	CTDC72-5 2019-08-27	Ver. 3	31.25	2018-10-30	Ver. 3	Ver. 3
CTDC73	CTDC73 2018-12-03	Ver. 3	8.325	CTDC73-2 2019-01-31	Ver. 3	31.65	CTDC73-4 2019-07-18	Ver. 3	48.75	2018-10-22	Ver. 3	Ver. 3
CTDC74	CTDC74 2018-12-21	Ver. 3	18.2	CTDC74-2 2019-03-14	Ver. 3	13.5				2018-12-17	Ver. 3	Ver. 3
CTDC75	CTDC75 2018-12-26	Ver. 3	33.95	CTDC75-2 2019-04-04	Ver. 3	7.7625				2016-08-16	Ver. 3	Ver. 3
CTDC76	CTDC76 2019-01-10	Ver. 3	6	CTDC76-2 2019-04-09	Ver. 3	5.5125				N/A	N/A	Ver. 3
CTDC77	CTDC77 2019-01-22	Ver. 3	12.2	CTDC77-2 2019-05-30	Ver. 3	11.65				2018-12-19	Ver. 3	Ver. 3
CTDC78	CTDC78 2019-01-31	Ver. 3	72	CTDC78-2 2019-04-04	Ver. 3	14.05				N/A	N/A	Ver. 3
CTDC79	CTDC79 2019-02-14	Ver. 3	10.8	CTDC79-2 2019-04-30	Ver. 3	15.55				2019-01-07	Ver. 3	Ver. 3
CTDC80	CTDC80 2019-02-18	Ver. 3	25.4	CTDC80-2 2019-04-18	Ver. 3	15.6	CTDC80-5 2019-10-31	Ver. 3	8.04	2019-02-01	Ver. 3	Ver. 3
CTDC81	CTDC81 2019-02-28	Ver. 3	22.2	CTDC81-2 2019-04-30	Ver. 3	3.09				2019-02-12	Ver. 3	Ver. 3
CTDC82	CTDC82 2019-03-14	Ver. 3	61	CTDC82-2 2019-06-13	Ver. 3	17.45				2019-02-25	Ver. 3	Ver. 3
CTDC83	CTDC83 2019-04-17	Ver. 3	24	CTDC83-2 2019-06-26	Ver. 3	12.76				2019-04-12	Ver. 3	Ver. 3
CTDC84	CTDC84 2019-04-30	Ver. 3	20.6	CTDC84-2 2019-07-23	Ver. 3	16.5				2019-04-10	Ver. 3	Ver. 3
CTDC85	CTDC85 2019-05-02	Ver. 3	18.7	CTDC85-2 2019-07-02	Ver. 3	14.35	CTDC85-3 2019-09-17	Ver. 3	7.575	2019-04-10	Ver. 3	Ver. 3
CTDC86	CTDC86 2019-05-07	Ver. 3	51.5	CTDC86-2 2019-07-11	Ver. 3	10.95				2019-04-04	Ver. 3	Ver. 3
CTDC87	CTDC87 2019-05-14	Ver. 3	29.95	CTDC87-2 2019-07-16	Ver. 3	3.3475				2019-04-09	Ver. 3	Ver. 3
CTDC88	CTDC88 2019-05-21	Ver. 3	555				CTDC88-2 2019-08-08	Ver. 3	156	N/A	N/A	Ver. 3
CTDC89	CTDC89 2019-05-31	Ver. 3	14.05	CTDC89-2 2019-08-22	Ver. 3	24.25				2019-05-06	Ver. 3	Ver. 3
CTDC90	CTDC90 2019-05-31	Ver. 3	10.1	CTDC90-2 2019-08-13	Ver. 3	15.35				2019-05-11	Ver. 3	Ver. 3
CTDC91	CTDC91 2019-07-03	Ver. 3	24				CTDC91-2 2019-10-10	Ver. 3	14.15	N/A	N/A	Ver. 3
CTDC92	CTDC92 2019-08-08	Ver. 3	9750	CTDC92-2 2019-10-08	Ver. 3	80				2019-07-20	Ver. 3	Ver. 3
CTDC93	CTDC93 2019-08-23	Ver. 3	4.955	CTDC93-2 2019-10-31	Ver. 3	16.9				2019-07-11	Ver. 3	Ver. 3
