# Supplementary material for: Circulating tumor DNA sequencing in colorectal cancer patients treated with first-line chemotherapy with anti-EGFR
Source: Sci Rep. 2021 Aug 11;11:16333. doi: 10.1038/s41598-021-95345-4 (PMC8358023; doi:10.1038/s41598-021-95345-4)
Supplement: Supplementary file 3 — Supplementary Table 2. [file 41598_2021_95345_MOESM3_ESM.xlsx]

## Sheet: Suppl. Table 2
Sample type	Sample ID	Raw read	Raw Base	Total read	Filtered ratio	Total Base R1	Total Base R2	Total Base	Target Size	Mapped read (reference genome: hg19)	Mapped read ratio	Mapped Bases	On target read (Target gene panel)	On target read ratio	On target base	On target base ratio	Mean depth over target region	Uncovered	1x coverage	10x coverage	20x coverage	50x coverage	100x coverage
cfDNA	CTDC01	36676036	5538081436	34476232	0.940021	2566408240	2563364788	5129773028	60527	23989413	0.695825	3022805235	7708333	0.321322	629726584	0.208325	10404.1	0.0028087	0.997191	0.99544	0.993193	0.985742	0.9829
cfDNA	CTDC01-2	45507660	6871656660	42665034	0.937535	3168675778	3164404967	6333080745	60527	28283914	0.66293	3612478881	7818142	0.276417	649076008	0.179676	10723.7	0.0027261	0.997274	0.995341	0.993986	0.988798	0.983214
cfDNA	CTDC01-5	24181334	3651381434	22684918	0.938117	1691145340	1689538746	3380684086	60527	17134044	0.755306	2196571591	4947617	0.288759	409486469	0.186421	6765.35	0.0027261	0.997274	0.993606	0.991706	0.986997	0.982917
cfDNA	CTDC02	32536348	4912988548	30277052	0.930561	2272139821	2268406712	4540546533	41761	7823710	0.258404	857473015	2410090	0.30805	162562545	0.189583	3892.69	0.0081895	0.991811	0.988386	0.985537	0.978425	0.978209
cfDNA	CTDC02-2	46401790	7006670290	42843054	0.923306	3207536928	3201310881	6408847809	41761	14882371	0.34737	1711050436	2480741	0.16669	163371732	0.0954804	3912.06	0.0059625	0.994038	0.986064	0.981466	0.978401	0.978018
cfDNA	CTDC02-15	16890366	2550445266	16773706	0.993093	1248863727	1248496752	2497360479	60527	7804268	0.465268	980129873	3025283	0.387645	253947300	0.259096	4195.6	0.0018504	0.99815	0.995324	0.989211	0.984618	0.980851
cfDNA	CTDC03	24958498	3768733198	23121384	0.926393	1736735827	1733716128	3470451955	41761	6516865	0.281854	718785105	2049002	0.314415	139972387	0.194735	3351.75	0.0043581	0.995642	0.990182	0.986542	0.980053	0.978233
cfDNA	CTDC03-2	37110656	5603709056	34091476	0.918644	2552629052	2547299569	5099928621	41761	9167437	0.268907	1053164204	3007144	0.328025	210771619	0.200132	5047.09	0.0079739	0.992026	0.989799	0.986135	0.982711	0.978329
cfDNA	CTDC03-6	13542928	2044982128	13442078	0.992553	993635568	993495011	1987130579	60527	9695404	0.721273	1154813365	4134269	0.426415	337227009	0.292019	5571.51	0.0014869	0.998513	0.993986	0.993573	0.989178	0.982619
cfDNA	CTDC04	38835836	5864211236	36465572	0.938967	2728430864	2724613020	5453043884	41761	8300710	0.227631	1006713006	2388199	0.28771	173557663	0.1724	4155.97	0.0077105	0.99229	0.98865	0.9875	0.980221	0.978209
cfDNA	CTDC04-2	27212554	4109095654	25203374	0.926167	1887483388	1878262115	3765745503	41761	9260559	0.367433	1103770327	2271319	0.245268	162479510	0.147204	3890.7	0.0053639	0.994636	0.989129	0.98149	0.976509	0.97366
cfDNA	CTDC04-3	33439600	5049379600	30967514	0.926073	2314536745	2310774180	4625310925	41761	16454902	0.53136	2085735797	4405552	0.267735	331174831	0.158781	7930.24	0.0043102	0.99569	0.992074	0.989392	0.9858	0.978904
cfDNA	CTDC05	30400430	4590464930	28141744	0.925702	2087999614	2085172666	4173172280	60527	11734719	0.416986	1446179159	3285591	0.279989	261286976	0.180674	4316.87	0.003486	0.996514	0.991078	0.98789	0.984057	0.981066
cfDNA	CTDC05-2	35559660	5369508660	33333504	0.937397	2463859699	2460974763	4924834462	60527	24047612	0.721425	3109630889	5595290	0.232675	467990435	0.150497	7731.93	0.0032052	0.996795	0.995754	0.993491	0.986552	0.983379
cfDNA	CTDC05-3	21603122	3262071422	20135862	0.932081	1500215540	1498658899	2998874439	60527	11728312	0.582459	1387015595	4097141	0.349338	323456063	0.233203	5344	0.0027095	0.99729	0.993557	0.9886	0.984998	0.98219
cfDNA	CTDC06	30668674	4630969774	23676560	0.772011	1771895991	1768002345	3539898336	41761	8208133	0.346678	988329955	2447702	0.298204	176970942	0.179061	4237.71	0.0102249	0.989775	0.980532	0.980532	0.97967	0.977802
cfDNA	CTDC06-2	32414220	4894547220	29728608	0.917147	2231298152	2219577306	4450875458	41761	10222821	0.343871	1196833304	3073559	0.300657	220005091	0.183823	5268.19	0.0070161	0.992984	0.989153	0.983621	0.978353	0.978329
cfDNA	CTDC07	35785852	5403663652	33841682	0.945672	2500944992	2498911384	4999856376	60527	25509546	0.753791	3328641131	6008691	0.235547	497351959	0.149416	8217.03	0.0024617	0.997538	0.994432	0.993358	0.987394	0.983445
cfDNA	CTDC07-2	23073256	3484061656	21700414	0.940501	1610213074	1608838434	3219051508	60527	15494401	0.714014	1940471875	5274962	0.340443	430953868	0.222087	7120.03	0.003833	0.996167	0.993474	0.991012	0.986997	0.983016
cfDNA	CTDC07-4	33295852	5027673652	31364042	0.94198	2322681507	2320025261	4642706768	60527	23275484	0.742107	3003849483	4963921	0.213268	403113023	0.134199	6660.05	0.0036678	0.996332	0.994168	0.992152	0.987378	0.981777
cfDNA	CTDC08	33341920	5034629920	27229274	0.816668	2027276712	2023976104	4051252816	41761	11013419	0.40447	1363975185	2660428	0.241562	192101464	0.140839	4600.02	0.0056512	0.994349	0.988338	0.986638	0.978688	0.977299
cfDNA	CTDC08-3	28609906	4320095806	26339236	0.920633	1971763621	1962052851	3933816472	41761	10254448	0.389322	1200738214	3050980	0.297527	214483975	0.178627	5135.99	0.0064175	0.993583	0.989919	0.985609	0.979455	0.97773
cfDNA	CTDC08-8	35323372	5333829172	32984654	0.933791	2460131337	2456580621	4916711958	41761	8535824	0.258782	1034995306	2080374	0.243723	148326599	0.143311	3551.8	0.0069443	0.993056	0.988554	0.985728	0.978329	0.977826
cfDNA	CTDC09	26403770	3986969270	24359438	0.922574	1788907596	1786656624	3575564220	60527	16311967	0.669636	2188551042	5719320	0.350621	498688905	0.227863	8239.11	0.0006939	0.999306	0.994614	0.993011	0.987609	0.983495
cfDNA	CTDC09-2	25441008	3841592208	23916842	0.94009	1768361951	1766511626	3534873577	60527	15174605	0.634474	1952062760	4113618	0.271086	344403278	0.17643	5690.08	0.0033043	0.996696	0.994779	0.992152	0.98518	0.982784
cfDNA	CTDC10	29598750	4469411250	23225676	0.784684	1735034399	1731648661	3466683060	41761	8209695	0.353475	1078733259	2654106	0.323289	205906607	0.190878	4930.6	0.004861	0.995139	0.989967	0.98683	0.980604	0.978137
cfDNA	CTDC10-2	32697208	4937278408	30342486	0.927984	2270709137	2259560723	4530269860	41761	12352891	0.407115	1460926020	2382651	0.192882	163467318	0.111893	3914.35	0.0067527	0.993247	0.98659	0.982759	0.97864	0.977491
cfDNA	CTDC11	29580076	4466591476	23443990	0.79256	1734011533	1730867541	3464879074	41761	16592680	0.707758	2364118276	4013605	0.24189	333239551	0.140957	7979.68	0.0056512	0.994349	0.991068	0.988386	0.980843	0.978257
cfDNA	CTDC12	31657650	4780305150	24379702	0.770105	1818773296	1814799051	3633572347	41761	5925749	0.243061	761244837	2104004	0.355061	161302733	0.211893	3862.52	0.0038313	0.996169	0.991379	0.98434	0.980269	0.976916
cfDNA	CTDC12-2	36975132	5583244932	34237598	0.925963	2564073552	2551437756	5115511308	41761	11256048	0.328763	1298683945	2862711	0.254326	196371731	0.151208	4702.28	0.0046934	0.995307	0.991715	0.985465	0.980915	0.978377
cfDNA	CTDC12-6	16042340	2422393340	15940386	0.993645	1180912055	1180828876	2361740931	60527	10302829	0.646335	1225365285	4690573	0.45527	382494469	0.312147	6319.4	0.0014869	0.998513	0.996183	0.994845	0.99007	0.981331
cfDNA	CTDC13	31152144	4703973744	23917738	0.767772	1791764172	1787570005	3579334177	41761	7511970	0.314075	890789259	2594038	0.345321	186597491	0.209474	4468.22	0.0093867	0.990613	0.988841	0.9824	0.979885	0.977371
cfDNA	CTDC13-2	35523572	5364059372	32910278	0.926435	2467334419	2455129425	4922463844	41761	10244908	0.311298	1158129950	2396792	0.23395	160298756	0.138412	3838.48	0.0067767	0.993223	0.985201	0.981179	0.978305	0.977587
cfDNA	CTDC14	27001894	4077285994	21166534	0.783891	1568431920	1565408107	3133840027	41761	16273228	0.768819	2030823509	2782156	0.170965	201524347	0.0992328	4825.66	0.0072556	0.992744	0.986518	0.983621	0.98046	0.977874
cfDNA	CTDC14-2	39390176	5947916576	35980048	0.913427	2690529201	2676783446	5367312647	41761	9922175	0.275769	1164612783	3261877	0.328746	232031862	0.199235	5556.19	0.0052441	0.994756	0.990709	0.987883	0.980173	0.979191
cfDNA	CTDC14-4	33347806	5035518706	30990350	0.929307	2309763424	2306331370	4616094794	41761	6794102	0.219233	788372715	2218010	0.326461	156923228	0.199047	3757.65	0.0069443	0.993056	0.989943	0.986351	0.978616	0.978281
cfDNA	CTDC15	26164858	3950893558	24413902	0.93308	1827372915	1824433160	3651806075	41761	6208478	0.254301	744462961	2030766	0.327096	147480961	0.198104	3531.55	0.0051483	0.994852	0.988434	0.984004	0.97979	0.978257
cfDNA	CTDC15-2	29340420	4430403420	27094898	0.923467	2033684759	2023214453	4056899212	41761	8290265	0.305971	968359985	2573958	0.31048	181559297	0.187492	4347.58	0.0054836	0.994516	0.989057	0.985082	0.979742	0.978042
cfDNA	CTDC15-4	32803456	4953321856	30455914	0.928436	2281029265	2277263401	4558292666	41761	12898214	0.423504	1542293222	2254669	0.174805	154358803	0.100084	3696.24	0.0068006	0.993199	0.987093	0.981394	0.979455	0.977802
cfDNA	CTDC16	33486618	5056479318	31183286	0.931216	2332989130	2329076994	4662066124	41761	6110110	0.195942	699783018	2017759	0.330233	140337124	0.200544	3360.48	0.0055075	0.994493	0.986902	0.984363	0.978329	0.977539
cfDNA	CTDC16-2	34820390	5257878890	32447580	0.931856	2428020475	2416686788	4844707263	41761	11922308	0.367433	1429566938	2265695	0.190038	156983372	0.109812	3759.09	0.0054836	0.994516	0.989464	0.986183	0.981562	0.977874
cfDNA	CTDC16-4	22957862	3466637162	22707110	0.989078	1670819728	1670505180	3341324908	60527	5288629	0.232906	565773766	2495108	0.471787	185858663	0.328504	3070.67	0.0059808	0.994019	0.992466	0.987064	0.983561	0.980653
cfDNA	CTDC17	35899000	5420749000	33037952	0.920303	2469249741	2465145389	4934395130	41761	7132163	0.215878	935623550	2213903	0.310411	171856427	0.183681	4115.24	0.0028735	0.997127	0.987955	0.984483	0.981873	0.978449
cfDNA	CTDC17-2	32618898	4925453598	29597436	0.907371	2220674583	2208904322	4429578905	41761	10500492	0.354777	1274388802	2879003	0.274178	210897497	0.165489	5050.11	0.0023946	0.997605	0.990302	0.984124	0.980436	0.978449
cfDNA	CTDC17-6	17127904	2586313504	16842312	0.983326	1244564906	1244014328	2488579234	60527	5693976	0.338076	608213218	1865210	0.327576	138942144	0.228443	2295.54	0.0031061	0.996894	0.992384	0.990649	0.983545	0.978786
cfDNA	CTDC18	30098796	4544918196	27866484	0.925834	2088745999	2085069988	4173815987	41761	6131510	0.220032	706183295	1985695	0.323851	140065472	0.198342	3353.98	0.0049568	0.995043	0.989248	0.98489	0.978449	0.978137
cfDNA	CTDC18-2	26189646	3954636546	21098082	0.805589	1584500797	1581167146	3165667943	41761	7982979	0.378375	911990493	1980304	0.248066	135275873	0.14833	3239.29	0.0087642	0.991236	0.986303	0.981298	0.978042	0.977419
cfDNA	CTDC19	29011350	4380713850	27305874	0.941213	2042910150	2040014956	4082925106	41761	13216629	0.484021	1615389921	1526591	0.115505	103273576	0.0639311	2472.97	0.0071358	0.992864	0.987381	0.983166	0.978329	0.973731
cfDNA	CTDC19-2	27834024	4202937624	22211474	0.797997	1667602893	1663922979	3331525872	41761	7637243	0.343842	863391377	2112087	0.276551	144602895	0.167482	3462.63	0.0069443	0.993056	0.985058	0.98228	0.978401	0.977467
cfDNA	CTDC20	28642258	4324980958	26031992	0.908867	1937466973	1933761668	3871228641	41761	8816060	0.338663	1145563593	2684197	0.304467	202963452	0.177173	4860.12	0.0064654	0.993535	0.990254	0.986638	0.980245	0.978066
cfDNA	CTDC20-2	28479790	4300448290	23169648	0.813547	1733441094	1729889406	3463330500	41761	6593015	0.284554	782969985	2102744	0.318935	151098109	0.192981	3618.16	0.0062738	0.993726	0.988386	0.983885	0.979862	0.97694
cfDNA	CTDC20-5	12246990	1849295490	12021786	0.981611	889737672	889162334	1778900006	60527	7442213	0.619061	880299225	3566669	0.479248	287577057	0.326681	4751.22	0.0015365	0.998463	0.996316	0.991574	0.984751	0.981281
cfDNA	CTDC21	32699706	4937655606	29831030	0.912272	2235917659	2231063065	4466980724	41761	7459962	0.250074	838778553	2331419	0.312524	159784425	0.190497	3826.16	0.0054357	0.994564	0.990661	0.985058	0.978353	0.978209
cfDNA	CTDC21-2	27127664	4096277264	21385310	0.788321	1601774485	1597894808	3199669293	41761	5324603	0.248984	598186121	1929700	0.362412	134554311	0.224937	3222.01	0.0091473	0.990853	0.982831	0.980508	0.979407	0.977898
cfDNA	CTDC21-5	17613818	2659686518	17398360	0.987768	1283934168	1283280087	2567214255	60527	5731195	0.32941	615998576	2858097	0.498691	219536956	0.356392	3627.09	0.0029739	0.997026	0.993788	0.991062	0.981892	0.979811
cfDNA	CTDC22	46134284	6966276884	43159026	0.935509	3197308520	3193877339	6391185859	60527	24564751	0.569168	3005946965	7417999	0.301977	592737824	0.197188	9792.95	0.0032052	0.996795	0.994911	0.99359	0.989806	0.983759
cfDNA	CTDC22-2	29834518	4505012218	27783566	0.931256	2070600794	2067681499	4138282293	60527	17676230	0.636212	2168359233	4966049	0.280945	396177990	0.182709	6545.48	0.003453	0.996547	0.993474	0.992235	0.985494	0.983164
cfDNA	CTDC23	27012988	4078961188	25270518	0.935495	1871283683	1869176781	3740460464	60527	17254454	0.68279	2172749902	6132226	0.3554	502776651	0.231401	8306.65	0.0020487	0.997951	0.99473	0.992185	0.986799	0.984255
cfDNA	CTDC23-2	36485910	5509372410	34234120	0.938283	2556593364	2553312957	5109906321	60527	20180876	0.589496	2496738873	6109072	0.302716	492293416	0.197175	8133.45	0.0027756	0.997224	0.995027	0.992499	0.986816	0.984569
cfDNA	CTDC23-3	27807770	4198973270	26169326	0.94108	1952410524	1950555640	3902966164	60527	18126621	0.692667	2228167963	6456885	0.35621	521600749	0.234094	8617.65	0.0033869	0.996613	0.994366	0.993077	0.985891	0.983198
cfDNA	CTDC24	25753740	3888814740	23803906	0.924289	1786148365	1782817070	3568965435	41761	9843184	0.413511	1156523278	1786444	0.18149	120970249	0.104598	2896.73	0.0069443	0.993056	0.986255	0.982735	0.979047	0.975264
cfDNA	CTDC24-2	34081990	5146380490	31368508	0.920384	2351842156	2347639321	4699481477	41761	6575778	0.20963	727959784	2416761	0.367525	165876328	0.227865	3972.04	0.0047652	0.995235	0.985489	0.9841	0.979383	0.978401
cfDNA	CTDC24-4	22807622	3443950922	22606010	0.99116	1664083887	1663836223	3327920110	60527	10295808	0.455446	1173901993	4981522	0.48384	392562363	0.334408	6485.74	0.0014869	0.998513	0.995176	0.992086	0.98594	0.981826
cfDNA	CTDC25	27499174	4152375274	25376980	0.922827	1878293437	1875300766	3753594203	41761	8029146	0.316395	1051987596	2224975	0.277112	174463894	0.165842	4177.68	0.0086205	0.991379	0.98604	0.983142	0.979646	0.97773
cfDNA	CTDC25-2	36122508	5454498708	33358410	0.92348	2499849847	2495459598	4995309445	41761	7234287	0.216865	822450664	2761730	0.381756	194508380	0.236499	4657.66	0.0074471	0.992553	0.992098	0.986207	0.981945	0.978401
cfDNA	CTDC26	31449196	4748828596	28920314	0.919588	2165860449	2161476015	4327336464	41761	28907474	0.999556	1116093212	2530305	0.29322	189666900	0.169938	4541.72	0.0050526	0.994947	0.986327	0.983837	0.981466	0.978042
cfDNA	CTDC26-2	40734886	6150967786	36969696	0.907568	2770656428	2766407243	5537063671	41761	14587577	0.394582	1688503481	2251682	0.154356	145777374	0.0863353	3490.75	0.0062499	0.99375	0.98604	0.982759	0.978616	0.978233
cfDNA	CTDC26-3	31743532	4793273332	31332628	0.987056	2294011314	2293591627	4587602941	60527	16378485	0.522729	1856239407	5665458	0.345909	429558870	0.231414	7096.98	0.0029739	0.997026	0.995572	0.995027	0.989575	0.983809
cfDNA	CTDC27	32281786	4874549686	29744518	0.921402	2224235210	2220195937	4444431147	41761	7646521	0.257073	905287761	1867091	0.244175	131544791	0.145307	3149.94	0.0075669	0.992433	0.985249	0.983861	0.978664	0.978329
cfDNA	CTDC27-2	36643336	5533143736	33764384	0.921433	2531788993	2527284255	5059073248	41761	10412659	0.308392	1199699650	2961589	0.284422	208186489	0.173532	4985.19	0.0073035	0.992696	0.986447	0.985848	0.978353	0.978281
cfDNA	CTDC27-7	15546944	2347588544	15440732	0.993168	1139046348	1138838057	2277884405	60527	9933863	0.643354	1184265788	4404301	0.443362	360827780	0.304685	5961.44	0.0029739	0.997026	0.992516	0.9924	0.987295	0.981727
cfDNA	CTDC28	33342694	5034746794	30632530	0.918718	2297510833	2292851233	4590362066	41761	7746106	0.252872	1046276151	2276255	0.293858	179355193	0.171422	4294.8	0.0072316	0.992768	0.987285	0.983501	0.978449	0.977946
cfDNA	CTDC28-2	40276204	6081706804	38036946	0.944402	2852474226	2848572977	5701047203	41761	21750226	0.571818	2780225949	1726173	0.0793635	121076548	0.0435492	2899.27	0.0074711	0.992529	0.989368	0.980867	0.978209	0.977347
cfDNA	CTDC28-8	16171124	2441839724	16064264	0.993392	1186794080	1186576233	2373370313	60527	10790133	0.671685	1306877522	5047160	0.467757	410475096	0.314088	6781.69	0.0018008	0.998199	0.995424	0.994085	0.988881	0.981562
cfDNA	CTDC29	28047442	4235163742	25959770	0.925566	1946826694	1943210289	3890036983	41761	7924940	0.305278	900540079	2637005	0.332748	184099912	0.204433	4408.42	0.0045018	0.995498	0.990637	0.98489	0.980508	0.978305
cfDNA	CTDC29-2	33392826	5042316726	31294966	0.937176	2329326782	2326483741	4655810523	60527	22272863	0.711708	2781357883	4988154	0.223957	399710208	0.14371	6603.83	0.0025443	0.997456	0.995275	0.990797	0.986931	0.982768
cfDNA	CTDC29-4	16998924	2566837524	16802732	0.988459	1247789292	1247434686	2495223978	60527	5990236	0.356504	700438205	2697337	0.450289	216492944	0.309082	3576.8	0.0016191	0.998381	0.993094	0.990698	0.985511	0.979976
cfDNA	CTDC30	36114924	5453353524	33975488	0.94076	2500699162	2498228744	4998927906	60527	22759272	0.669873	2934336879	5234618	0.229999	426727500	0.145426	7050.2	0.0026269	0.997373	0.993127	0.991574	0.987361	0.98295
cfDNA	CTDC30-2	32156456	4855624856	30103610	0.936161	2245697448	2242493881	4488191329	60527	19811226	0.658101	2482233718	5883289	0.296967	478243252	0.192666	7901.32	0.0022635	0.997737	0.994895	0.993557	0.987344	0.983049
cfDNA	CTDC30-3	18990532	2867570332	18859970	0.993125	1386885009	1386440395	2773325404	60527	11842163	0.627899	1411620845	5270022	0.445022	433658766	0.307206	7164.72	0.0014869	0.998513	0.997026	0.995473	0.991756	0.982091
cfDNA	CTDC31	35052202	5292882502	32829350	0.936585	2446347350	2443208267	4889555617	60527	18939629	0.576911	2452484975	6564642	0.346609	550764385	0.224574	9099.48	0.002313	0.997687	0.99468	0.993441	0.986849	0.983098
cfDNA	CTDC31-2	26532048	4006339248	25143056	0.947649	1867817242	1865732807	3733550049	60527	19381181	0.770836	2586241672	4226848	0.21809	359923628	0.139169	5946.5	0.0036513	0.996349	0.99359	0.989955	0.985279	0.981579
cfDNA	CTDC31-6	12469020	1882822020	12283372	0.985111	915417588	914809755	1830227343	60527	7698250	0.626721	1029697145	3483962	0.452565	301368469	0.292677	4979.07	0.00152	0.99848	0.99544	0.991475	0.983924	0.98214
cfDNA	CTDC32	60016358	9062470058	56261816	0.937441	4202410351	4198570537	8400980888	60527	27819849	0.494471	3281538295	8363780	0.300641	659544375	0.200986	10896.7	0.0027591	0.997241	0.995952	0.993656	0.990335	0.985692
cfDNA	CTDC32-2	26180786	3953298686	24657604	0.941821	1835857057	1834359347	3670216404	60527	17551837	0.711822	2205066386	5571760	0.317446	458695807	0.208019	7578.37	0.0019495	0.99805	0.993507	0.992995	0.986882	0.983379
cfDNA	CTDC32-4	49191710	7427948210	43318118	0.880598	3231866719	3224789740	6456656459	60527	29813988	0.688257	3633793297	7367614	0.247119	582685012	0.160352	9626.86	0.0029904	0.99701	0.99544	0.9943	0.987212	0.983776
cfDNA	CTDC33	21484458	3244153158	20228434	0.941538	1489979510	1488636812	2978616322	60527	14443588	0.714024	1849120231	5009150	0.346808	422834669	0.228668	6985.89	0.003453	0.996547	0.993491	0.991326	0.986221	0.98252
cfDNA	CTDC33-2	41573688	6277626888	39216388	0.943298	2914075023	2911666653	5825741676	60527	25943898	0.661558	3324696679	5011003	0.193148	409968892	0.12331	6773.32	0.00228	0.99772	0.994796	0.991921	0.986618	0.983082
cfDNA	CTDC33-3	154695974	23359092074	145419340	0.940033	10694039930	10684879582	21378919512	60527	41477036	0.285224	5237366631	13331886	0.321428	1104995274	0.210983	18256.2	0.0016026	0.998397	0.996316	0.995903	0.990649	0.989129
cfDNA	CTDC34	32346170	4884271670	30092104	0.930314	2233797188	2230802576	4464599764	60527	19629071	0.6523	2439523931	6352249	0.323614	511158078	0.209532	8445.12	0.0021808	0.997819	0.994317	0.991442	0.986105	0.983297
cfDNA	CTDC34-2	54729680	8264181680	51298838	0.937313	3809295896	3804138719	7613434615	60527	32914999	0.641632	4275635188	8552772	0.259844	716257868	0.167521	11833.7	0.0031061	0.996894	0.99539	0.993491	0.988138	0.984833
cfDNA	CTDC34-7	18347120	2770415120	18221426	0.993149	1345732186	1345801070	2691533256	60527	9279707	0.509274	1045895131	4145332	0.446709	325731240	0.311438	5381.59	0.0014869	0.998513	0.993474	0.99245	0.985428	0.981892
cfDNA	CTDC35	36872264	5567711864	34171038	0.926741	2484473228	2481998047	4966471275	60527	25971474	0.760043	3412082128	5739482	0.220992	494493388	0.144924	8169.8	0.0031391	0.996861	0.994548	0.992301	0.988501	0.983445
cfDNA	CTDC35-2	27679272	4179570072	25987790	0.93889	1922597154	1920894593	3843491747	60527	18576807	0.714828	2467049913	4312028	0.232119	369748479	0.149875	6108.82	0.0035026	0.996497	0.994449	0.992962	0.986733	0.982041
cfDNA	CTDC36	25109002	3791459302	23555120	0.938115	1738934862	1736967716	3475902578	60527	18823622	0.799131	2397120847	7764875	0.412507	591148337	0.246608	9766.69	0.0036347	0.996365	0.992945	0.991442	0.985031	0.980306
cfDNA	CTDC36-2	50978418	7697741118	48069380	0.942936	3576232187	3573027351	7149259538	60527	33911385	0.705467	4089667531	4426956	0.130545	331736339	0.0811157	5480.8	0.0033208	0.996679	0.993342	0.990269	0.984684	0.980984
cfDNA	CTDC36-3	34214166	5166339066	30247652	0.884068	2252079772	2247343950	4499423722	60527	18542513	0.613023	2414651298	7355118	0.396662	616182790	0.255185	10180.3	0.0035026	0.996497	0.993375	0.992103	0.984618	0.981958
cfDNA	CTDC37	26140752	3947253552	24421770	0.934241	1791654334	1789900108	3581554442	60527	16007825	0.655474	2023530726	4908936	0.306659	407058744	0.201163	6725.24	0.0028582	0.997142	0.993424	0.991723	0.98632	0.983611
cfDNA	CTDC37-2	45512004	6872312604	42734382	0.938969	3178317730	3175355220	6353672950	60527	25812379	0.604019	3284270432	8986536	0.348148	747240299	0.227521	12345.6	0.0031061	0.996894	0.995704	0.993474	0.989195	0.985709
cfDNA	CTDC38	23971832	3619746632	22427706	0.935586	1613567316	1612199642	3225766958	60527	18413529	0.821017	2403326280	6932044	0.376465	566318067	0.235639	9356.45	0.0031061	0.996894	0.992004	0.987064	0.982702	0.980125
cfDNA	CTDC38-2	25343998	3826943698	23877120	0.942121	1780046711	1778497702	3558544413	60527	15761547	0.660111	1974004241	4948328	0.313949	405527841	0.205434	6699.95	0.0034034	0.996597	0.993639	0.990335	0.986171	0.983065
cfDNA	CTDC38-5	233806	35304706	230686	0.986656	16976423	16971760	33948183	60527	137093	0.594284	17217775	66367	0.484102	5534153	0.321421	91.4328	0.0163563	0.983644	0.967651	0.932922	0.625836	0.29719
cfDNA	CTDC39	20195364	3049499964	19966662	0.988676	1391908295	1391629750	2783538045	60527	10281305	0.514924	1269336506	4883942	0.475031	405090570	0.319136	6692.73	0.0029904	0.99701	0.993424	0.991557	0.986832	0.981397
cfDNA	CTDC39-3	41782440	6309148440	39298902	0.94056	2925822346	2923094765	5848917111	60527	21448621	0.545782	2584107337	6657143	0.310376	528019145	0.204333	8723.7	0.0036843	0.996316	0.99359	0.992978	0.987113	0.9829
cfDNA	CTDC39-6	13094722	1977303022	12792188	0.976896	942917430	942222916	1885140346	60527	6660911	0.520701	754490322	2953710	0.443439	231797109	0.307223	3829.65	0.0015695	0.99843	0.993474	0.989641	0.981265	0.980306
cfDNA	CTDC40	18079620	2730022620	17864994	0.988129	1301913754	1301655013	2603568767	60527	7232613	0.404848	832740678	3333909	0.460955	263153120	0.316008	4347.7	0.00418	0.99582	0.995523	0.993788	0.986717	0.982636
cfDNA	CTDC40-2	24054418	3632217118	23634622	0.982548	1749153727	1747970454	3497124181	60527	14591182	0.617365	1702490793	6622343	0.453859	524071884	0.307827	8658.48	0.0017182	0.998282	0.996927	0.995936	0.989013	0.982999
cfDNA	CTDC40-3	17009368	2568414568	16781178	0.986584	1238377822	1237945736	2476323558	60527	5814651	0.346498	640664140	2661327	0.457693	202498988	0.316077	3345.6	0.0029739	0.997026	0.993854	0.989691	0.983561	0.981678
cfDNA	CTDC41	17215636	2599561036	16314294	0.947644	1212313578	1211246898	2423560476	60527	13362846	0.819088	1736278303	2532159	0.189492	206371331	0.118858	3409.57	0.0036347	0.996365	0.991772	0.986816	0.981958	0.980042
cfDNA	CTDC41-2	37635630	5682980130	35343564	0.939099	2629563033	2626883820	5256446853	60527	21964763	0.621464	2815553574	7237068	0.329485	603841384	0.214466	9976.4	0.0034034	0.996597	0.994977	0.993375	0.986469	0.985015
cfDNA	CTDC41-3	18702546	2824084446	18500270	0.989185	1357709652	1357340733	2715050385	60527	8255471	0.446235	1033660330	3620109	0.43851	307034068	0.297036	5072.68	0.0018174	0.998183	0.994052	0.990401	0.983594	0.981678
cfDNA	CTDC42	8452680	1276354680	7840570	0.927584	583615412	582863868	1166479280	60527	5753104	0.733761	695180928	1771405	0.307904	140060701	0.201474	2314.02	0.0041469	0.995853	0.990583	0.9848	0.979464	0.977646
cfDNA	CTDC42-2	29180930	4406320430	27144310	0.930207	2026034374	2024040992	4050075366	60527	10783643	0.397271	1266956986	3288337	0.304937	259003920	0.20443	4279.15	0.0035026	0.996497	0.993755	0.991524	0.986171	0.980472
cfDNA	CTDC42-11	17209684	2598662284	16835698	0.978269	1236357294	1236025759	2472383053	60527	3659411	0.21736	366414990	1574825	0.430349	112698994	0.307572	1861.96	0.0052704	0.99473	0.990913	0.984883	0.980158	0.978654
cfDNA	CTDC43	126478330	19098227830	117280158	0.927275	8733473048	8722318981	17455792029	41761	117167124	0.999036	4860654246	7016624	0.170831	523133002	0.107626	12526.8	0.0042863	0.995714	0.994349	0.992912	0.990541	0.984962
cfDNA	CTDC43-2	10726464	1619696064	9984114	0.930793	745556132	744739876	1490296008	60527	7309724	0.732135	879370413	2574011	0.352135	205871839	0.234113	3401.32	0.0022469	0.997753	0.993375	0.990302	0.983346	0.980372
cfDNA	CTDC43-6	15498100	2340213100	15392030	0.993156	1144305627	1144096882	2288402509	60527	10402929	0.675865	1219326197	4642701	0.446288	374277135	0.306954	6183.64	0.0029739	0.997026	0.994383	0.992185	0.988551	0.981446
cfDNA	CTDC44	18290340	2761841340	17054300	0.932421	1259586066	1258039901	2517625967	60527	12089612	0.708889	1510264067	4432910	0.366671	366327423	0.242559	6052.3	0.0023791	0.997621	0.993937	0.991194	0.983809	0.982752
cfDNA	CTDC44-2	21012986	3172960886	19663264	0.935767	1459538336	1458175240	2917713576	60527	13806416	0.702143	1730343649	3846240	0.278584	311851711	0.180225	5152.27	0.0043947	0.995605	0.992896	0.99017	0.983677	0.981892
cfDNA	CTDC44-3	12389164	1870763764	12172906	0.982545	896570031	896066647	1792636678	60527	7977697	0.655365	918220344	4074221	0.510701	324649097	0.353563	5363.71	0.0017678	0.998232	0.994449	0.990599	0.983346	0.981083
cfDNA	CTDC45	70430314	10634977414	65173598	0.925363	4768664590	4762827244	9531491834	60527	54643757	0.838434	6865614927	14972028	0.273993	1225486997	0.178496	20246.9	0.0017017	0.998298	0.996729	0.995886	0.991904	0.989063
cfDNA	CTDC45-2	19086144	2882007744	18862668	0.988291	1358429063	1358088308	2716517371	60527	8795414	0.466287	1028367492	4405070	0.500837	355870242	0.346054	5879.53	0.0017843	0.998216	0.995341	0.993044	0.98675	0.980868
cfDNA	CTDC46	32525724	4911384324	30633874	0.941835	2231756795	2229844785	4461601580	60527	22238175	0.725934	2868064008	3883123	0.174615	320444437	0.111728	5294.24	0.0028582	0.997142	0.99359	0.991359	0.984932	0.982388
cfDNA	CTDC46-2	11620996	1754770396	11389300	0.980062	839944345	839430247	1679374592	60527	5709563	0.501309	627000759	2822543	0.494354	216559904	0.34539	3577.91	0.0034695	0.99653	0.995043	0.989311	0.983842	0.981892
cfDNA	CTDC46-10	16962118	2561279818	16656288	0.98197	1211098446	1210592462	2421690908	60527	6695377	0.401973	721020506	3188790	0.476267	247332300	0.343031	4086.31	0.0032382	0.996762	0.993986	0.992103	0.983644	0.980472
cfDNA	CTDC47	41271318	6231969018	38442050	0.931447	2842367420	2838868459	5681235879	60527	24883593	0.647301	3084759511	6361859	0.255665	511511764	0.165819	8450.97	0.0019661	0.998034	0.994812	0.992037	0.987807	0.983231
cfDNA	CTDC47-2	20016250	3022453750	19801048	0.989249	1460292675	1459888067	2920180742	60527	9948109	0.502403	1103482875	4063423	0.408462	310283687	0.281186	5126.37	0.0044608	0.995539	0.993424	0.991772	0.985048	0.981182
cfDNA	CTDC48	42164378	6366821078	39637644	0.940074	2968947260	2965151800	5934099060	60527	23748075	0.599129	2794186320	7427908	0.312779	577120076	0.206543	9534.92	0.0035687	0.996431	0.993937	0.992532	0.987245	0.982702
cfDNA	CTDC48-2	19822032	2993126832	19446318	0.981046	1448724806	1448341366	2897066172	60527	8680923	0.446404	1166698585	3564366	0.410598	309966866	0.265679	5121.13	0.0029739	0.997026	0.99658	0.991029	0.982157	0.981017
cfDNA	CTDC48-9	24916228	3762350428	24739412	0.992904	1838985277	1838709771	3677695048	60527	9323205	0.376856	1002015663	4078410	0.437447	311442167	0.310816	5145.51	0.0019	0.9981	0.995539	0.991591	0.9848	0.981298
cfDNA	CTDC49	25723058	3884181758	25405730	0.987664	1877404831	1877281928	3754686759	60527	16301275	0.641638	1896276633	6918644	0.424423	546322441	0.288103	9026.09	0.0038495	0.996151	0.994052	0.994036	0.991822	0.98485
cfDNA	CTDC50	16479814	2488451914	16363196	0.992924	1196688275	1196543199	2393231474	60527	11029352	0.674034	1315838885	5009254	0.454175	410106858	0.31167	6775.6	0.0023791	0.997621	0.994019	0.992565	0.989575	0.981661
cfDNA	CTDC50-2	15095720	2279453720	15001068	0.99373	1113165071	1113074937	2226240008	60527	10013779	0.667538	1187759546	4348309	0.434233	352615109	0.296874	5825.75	0.0029739	0.997026	0.994052	0.992152	0.988154	0.981232
cfDNA	CTDC50-3	21295140	3215566140	21148502	0.993114	1545216818	1545026033	3090242851	60527	12796899	0.605097	1542258194	5511647	0.430702	452886114	0.293651	7482.38	0.0029904	0.99701	0.994052	0.992565	0.988369	0.983759
cfDNA	CTDC51	21177094	3197741194	21000094	0.991642	1446166601	1445777121	2891943722	60527	13170919	0.627184	1588713991	6654051	0.505208	539226204	0.33941	8908.85	0.0014869	0.998513	0.995473	0.994052	0.987146	0.982999
cfDNA	CTDC51-2	237574	35873674	234158	0.985621	17177797	17175060	34352857	60527	149093	0.63672	18105124	59307	0.397785	4944025	0.273073	81.683	0.016092	0.983908	0.970724	0.937268	0.634659	0.254333
cfDNA	CTDC52	22521730	3400781230	22079694	0.980373	1628895068	1628467869	3257362937	60527	4185491	0.189563	417433066	1903139	0.454699	135705401	0.325095	2242.06	0.0061956	0.993804	0.992334	0.985824	0.982652	0.979645
cfDNA	CTDC52-2	18128934	2737469034	17729310	0.977957	1314009606	1313780794	2627790400	60527	5337430	0.301051	555731184	2383592	0.44658	177854311	0.320037	2938.43	0.0044608	0.995539	0.995539	0.990864	0.982025	0.979778
cfDNA	CTDC52-9	13802052	2084109852	13699640	0.99258	1007623091	1007407176	2015030267	60527	4481478	0.327124	478348731	1993264	0.444778	150419213	0.314455	2485.16	0.0050886	0.994911	0.992284	0.989459	0.984007	0.979728
cfDNA	CTDC53	17485242	2640271542	17356534	0.992639	1243258159	1242771023	2486029182	60527	10184530	0.586784	1226565169	4521575	0.443965	374972951	0.30571	6195.14	0.0033374	0.996663	0.994234	0.993408	0.986865	0.981545
cfDNA	CTDC53-2	30145588	4551983788	29829210	0.989505	2165330235	2165443969	4330774204	60527	11040251	0.370115	1284123217	5020058	0.454705	407682187	0.317479	6735.54	0.0014869	0.998513	0.996547	0.993722	0.989575	0.981661
cfDNA	CTDC53-5	14064514	2123741614	13963614	0.992826	1006487169	1006170508	2012657677	60527	9676186	0.692957	1226508049	4156089	0.429517	355107126	0.289527	5866.92	0.0014869	0.998513	0.996167	0.994052	0.98827	0.98371
cfDNA	CTDC54	22333802	3372404102	22108242	0.989901	1631459799	1631227509	3262687308	60527	14467577	0.654397	1621255219	6477262	0.447709	494039728	0.304727	8162.3	0.0015035	0.998497	0.994581	0.993375	0.989162	0.982702
cfDNA	CTDC54-2	25525200	3854305200	25280294	0.990405	1861437937	1861310734	3722748671	60527	14351065	0.567678	1603777824	6948693	0.484194	532000344	0.331717	8789.47	0.0020487	0.997951	0.995291	0.993705	0.987807	0.982867
cfDNA	CTDC55-2	15907306	2402003206	15712786	0.987772	1162364854	1161748317	2324113171	60527	9473021	0.602886	1088451650	4562177	0.481597	361024850	0.331687	5964.69	0.0036678	0.996332	0.99392	0.992681	0.98409	0.980868
cfDNA	CTDC55-3	16372536	2472252936	16136528	0.985585	1186549629	1185837514	2372387143	60527	9395972	0.58228	1127844782	4191782	0.446125	340189450	0.301628	5620.46	0.0020156	0.997984	0.993887	0.992169	0.985775	0.981397
cfDNA	CTDC56	12166176	1837092576	12069738	0.992073	846255569	845912107	1692167676	60527	8967489	0.742973	1107929904	4040786	0.450604	345129040	0.311508	5702.07	0.0016852	0.998315	0.996233	0.993408	0.986733	0.981248
cfDNA	CTDC56-2	20585000	3108335000	20346628	0.98842	1509346016	1509284879	3018630895	60527	8480099	0.416782	924050827	3937718	0.464348	302387357	0.327241	4995.91	0.0019165	0.998084	0.994432	0.992119	0.986056	0.980785
cfDNA	CTDC56-8	21118482	3188890782	20965346	0.992749	1534147853	1533539982	3067687835	60527	14195042	0.677072	1693314695	6508686	0.458518	534411510	0.315601	8829.31	0.0014869	0.998513	0.995539	0.995539	0.990897	0.985378
cfDNA	CTDC57	17332504	2617208104	17100714	0.986627	1264784870	1264783538	2529568408	60527	9684929	0.566346	1129800944	4173170	0.430893	342491815	0.303144	5658.5	0.0015035	0.998497	0.995523	0.99511	0.987014	0.982206
cfDNA	CTDC57-2	18638720	2814446720	18474548	0.991192	1371602463	1371606492	2743208955	60527	9341837	0.50566	1050013060	4205462	0.450175	329984503	0.314267	5451.86	0.0014869	0.998513	0.994052	0.993821	0.986584	0.98219
cfDNA	CTDC57-5	17676884	2669209484	17465994	0.98807	1299023480	1298912793	2597936273	60527	9325248	0.533909	1038477207	4108047	0.44053	325352921	0.313298	5375.34	0.0029739	0.997026	0.995539	0.993986	0.988749	0.981033
cfDNA	CTDC58	14897730	2249557230	14701152	0.986805	1089218291	1089146762	2178365053	60527	4999627	0.340084	536234894	2239276	0.447889	170843311	0.318598	2822.6	0.0029904	0.99701	0.993391	0.989492	0.983528	0.979612
cfDNA	CTDC58-2	16049124	2423417724	15865134	0.988536	1171722795	1171694535	2343417330	60527	5294066	0.333692	568605513	2307317	0.435831	173407337	0.304969	2864.96	0.0044773	0.995523	0.991078	0.988617	0.980984	0.979018
cfDNA	CTDC58-5	19703400	2975213400	19319060	0.980494	1432943258	1432828163	2865771421	60527	4947928	0.256116	527778367	1996301	0.403462	151662086	0.287359	2505.69	0.0035852	0.996415	0.994052	0.99126	0.981711	0.979034
cfDNA	CTDC59	14954190	2258082690	14841622	0.992472	1061774398	1061778003	2123552401	60527	8812185	0.593748	1072022848	4191928	0.475697	350015754	0.3265	5782.8	0.0032713	0.996729	0.992334	0.989591	0.986469	0.981413
cfDNA	CTDC59-2	21356342	3224807642	20781126	0.973066	1529954910	1529689690	3059644600	60527	8157884	0.392562	929845024	2456472	0.301116	191535883	0.205987	3164.47	0.0029739	0.997026	0.992334	0.991491	0.982768	0.979761
cfDNA	CTDC60	11931808	1801703008	11860162	0.993995	846231745	845867403	1692099148	60527	9508273	0.801698	1149158110	4716073	0.495997	396673890	0.345187	6553.67	0.0032878	0.996712	0.993507	0.9924	0.98675	0.981066
cfDNA	CTDC60-2	16152026	2438955926	16006448	0.990987	1184647492	1183391532	2368039024	60527	11589533	0.724054	1342166975	5660711	0.488433	443641716	0.330541	7329.65	0.0015035	0.998497	0.994664	0.992235	0.988286	0.981925
cfDNA	CTDC61	16184762	2443899062	16086334	0.993918	1194773512	1194188957	2388962469	60527	10082577	0.626779	1173419553	4841568	0.480192	389133330	0.331623	6429.09	0.0029739	0.997026	0.995539	0.994036	0.987427	0.981909
cfDNA	CTDC61-2	15834948	2391077148	15742636	0.99417	1162368177	1161942811	2324310988	60527	9920342	0.630158	1262103049	5088053	0.512891	443221424	0.351177	7322.71	0.0019495	0.99805	0.992598	0.992284	0.988534	0.981397
cfDNA	CTDC61-6	9883194	1492362294	9821292	0.993737	722756397	722496969	1445253366	60527	7177035	0.730763	880420094	3511644	0.489289	294858835	0.334907	4871.53	0.0019826	0.998017	0.99392	0.993325	0.983792	0.979579
cfDNA	CTDC62	25437632	3841082432	25126924	0.987785	1857697679	1856900440	3714598119	60527	16218868	0.645478	1882956329	7379539	0.454997	594553668	0.315755	9822.95	0.0015035	0.998497	0.995539	0.994052	0.992136	0.986304
cfDNA	CTDC62-2	18846240	2845782240	18663352	0.990296	1386493168	1386407639	2772900807	60527	11202860	0.60026	1316077152	5552784	0.495658	450417310	0.342242	7441.59	0.0029739	0.997026	0.994548	0.993986	0.987411	0.981314
cfDNA	CTDC63	15420198	2328449898	15308922	0.992784	1068913674	1068666076	2137579750	60527	10369040	0.67732	1227889735	3836801	0.370025	316755946	0.257968	5233.3	0.0033539	0.996646	0.993986	0.993193	0.986651	0.980653
cfDNA	CTDC63-2	26319892	3974303692	26009924	0.988223	1931776399	1931753175	3863529574	60527	10729893	0.412531	1158093367	4198245	0.391266	318065416	0.274646	5254.93	0.0015365	0.998463	0.994598	0.993904	0.989393	0.98333
cfDNA	CTDC64	19375416	2925687816	19228226	0.992403	1398469700	1398497767	2796967467	60527	11682728	0.607582	1352364275	5604487	0.479724	442749012	0.327389	7314.9	0.0029739	0.997026	0.995721	0.992367	0.98632	0.981859
cfDNA	CTDC64-2	21611244	3263297844	21381148	0.989353	1577429564	1577375774	3154805338	60527	14769962	0.690794	1760550807	7051753	0.477439	572186444	0.325004	9453.41	0.0015861	0.998414	0.995523	0.994151	0.991326	0.984321
cfDNA	CTDC65	17683344	2670184944	17451140	0.986869	1272772305	1272568169	2545340474	60527	10075520	0.577356	1098277369	4434282	0.440105	336828115	0.306688	5564.92	0.0044773	0.995523	0.992565	0.991359	0.984552	0.98138
cfDNA	CTDC65-2	17403538	2627934238	17236456	0.9904	1263166825	1263142783	2526309608	60527	10631493	0.616803	1245699786	4933969	0.46409	394343889	0.316564	6515.17	0.0024782	0.997522	0.99463	0.991392	0.987229	0.983148
cfDNA	CTDC66	19597146	2959169046	19451262	0.992556	1392253099	1391953547	2784206646	60527	10968578	0.563901	1369508399	5275788	0.480991	438704723	0.320337	7248.08	0.0005617	0.999438	0.994052	0.993557	0.989509	0.982999
cfDNA	CTDC66-2	22716098	3430130798	22432888	0.987533	1655482233	1654755708	3310237941	60527	14235344	0.634575	1675954097	5667529	0.398131	455489532	0.271779	7525.39	0.0015035	0.998497	0.995721	0.995539	0.992879	0.984734
cfDNA	CTDC67	15681478	2367903178	15484072	0.987412	1120834893	1120314128	2241149021	60527	9146549	0.590707	1221328990	3911095	0.427603	339401072	0.277895	5607.43	0.0032217	0.996778	0.99359	0.991987	0.986965	0.981777
cfDNA	CTDC67-2	18833536	2843863936	18583468	0.986722	1378181730	1378241617	2756423347	60527	12266566	0.660079	1400856020	5477679	0.446554	431175867	0.307795	7123.69	0.0027426	0.997257	0.994399	0.993705	0.987857	0.982091
cfDNA	CTDC68-2	19452734	2937362834	19323064	0.993334	1437950339	1437869949	2875820288	60527	12075723	0.624938	1420296546	5506294	0.45598	440436016	0.310101	7276.69	0.00152	0.99848	0.995077	0.992565	0.987477	0.981694
cfDNA	CTDC68-3	18686682	2821688982	18554506	0.992927	1379938150	1379503629	2759441779	60527	11514250	0.620564	1283217167	5357900	0.465328	409514791	0.319131	6765.82	0.0029739	0.997026	0.993623	0.992499	0.985164	0.981265
cfDNA	CTDC68-6	12251032	1849905832	12087804	0.986676	889240640	888848654	1778089294	60527	8847326	0.731922	1130176342	3606600	0.407649	306270909	0.270994	5060.07	0.0002313	0.999769	0.994003	0.992152	0.982818	0.98067
cfDNA	CTDC69	21405308	3232201508	21099804	0.985728	1553084078	1552402257	3105486335	60527	10515300	0.49836	1176766586	4566929	0.434313	359337889	0.30536	5936.82	0.0029739	0.997026	0.995539	0.993821	0.988484	0.982652
cfDNA	CTDC69-2	27202718	4107610418	26842620	0.986762	1987193269	1986288599	3973481868	60527	14607730	0.544199	1658241691	6084983	0.416559	480587396	0.289817	7940.05	0.0017513	0.998249	0.996547	0.994779	0.990748	0.983445
cfDNA	CTDC69-6	12037728	1817696928	11887778	0.987543	884988716	884532289	1769521005	60527	8252865	0.694231	1059142810	3432887	0.415963	294089260	0.277667	4858.81	0.0009252	0.999075	0.992648	0.992384	0.985197	0.980538
cfDNA	CTDC70	21299720	3216257720	21096782	0.990472	1497372949	1496804922	2994177871	60527	10262610	0.486454	1194554893	5010011	0.488181	401658387	0.336241	6636.02	0.0044608	0.995539	0.994036	0.993953	0.988418	0.982884
cfDNA	CTDC70-2	22501638	3397747338	22301866	0.991122	1603761006	1603695819	3207456825	60527	14760330	0.661843	1847085704	4887687	0.331137	410544505	0.222266	6782.83	0.0018339	0.998166	0.995837	0.994217	0.986981	0.983132
cfDNA	CTDC70-5	16281486	2458504386	16054142	0.986037	1143339229	1142779559	2286118788	60527	11190285	0.697034	1322072343	3431662	0.306664	273043132	0.206527	4511.1	0.0032382	0.996762	0.99387	0.992962	0.982966	0.981611
cfDNA	CTDC71	18142636	2739538036	17920672	0.987766	1322872539	1322088530	2644961069	60527	11171164	0.623367	1338249149	5176883	0.463415	423807779	0.316688	7001.96	0.0014869	0.998513	0.995523	0.994812	0.99012	0.983098
cfDNA	CTDC71-2	20849188	3148227388	20657394	0.990801	1532580465	1532630988	3065211453	60527	11572661	0.560219	1302399233	5353644	0.462611	417320041	0.320424	6894.77	0.0014869	0.998513	0.995539	0.994052	0.98903	0.982752
cfDNA	CTDC71-5	16173508	2442199708	15977844	0.987902	1186671435	1186012475	2372683910	60527	9950411	0.622763	1139560237	4391072	0.441296	344385085	0.302209	5689.78	0.0021148	0.997885	0.995374	0.992582	0.985643	0.981909
cfDNA	CTDC72	18478570	2790264070	18308100	0.990775	1351932422	1351917863	2703850285	60527	11837331	0.646563	1371999829	5704334	0.481894	454712671	0.331423	7512.56	0.0025608	0.997439	0.995771	0.994052	0.991541	0.983792
cfDNA	CTDC72-2	12416130	1874835630	12267976	0.988068	908356223	907947786	1816304009	60527	8893864	0.724966	1050099566	4099420	0.460927	334458878	0.318502	5525.78	0.0018008	0.998199	0.995473	0.993424	0.985692	0.980356
cfDNA	CTDC72-5	17492182	2641319482	17350806	0.991918	1286723247	1286630877	2573354124	60527	10284921	0.592763	1166851893	4882673	0.474741	380015114	0.325676	6278.44	0.0014869	0.998513	0.996977	0.994548	0.98751	0.981215
cfDNA	CTDC73	23163462	3497682762	22958474	0.99115	1692485649	1691660812	3384146461	60527	16013562	0.697501	1865365073	5892094	0.367944	466676014	0.250179	7710.21	0.0014869	0.998513	0.99463	0.99397	0.991789	0.982818
cfDNA	CTDC73-2	17416618	2629909318	17279708	0.992139	1281872784	1281862108	2563734892	60527	10142514	0.586961	1186739149	5004212	0.49339	403195369	0.339751	6661.41	0.0050556	0.994944	0.99354	0.992499	0.986981	0.981645
cfDNA	CTDC73-4	21869158	3302242858	21698392	0.992191	1612736368	1612427400	3225163768	60527	11295452	0.520566	1284300944	5586751	0.494602	440455586	0.342954	7277.01	0.0029739	0.997026	0.994845	0.992516	0.988352	0.982719
cfDNA	CTDC74	20203746	3050765646	20056898	0.992732	1455367374	1455227450	2910594824	60527	15129851	0.754347	1873847215	3050305	0.201608	243740480	0.130075	4026.97	0.0018504	0.99815	0.994151	0.993457	0.984404	0.980719
cfDNA	CTDC74-2	17635446	2662952346	17509872	0.992879	1298860303	1298479386	2597339689	60527	12225212	0.69819	1448558749	5793656	0.47391	463287092	0.319826	7654.22	0.0014869	0.998513	0.995539	0.995523	0.989145	0.983082
cfDNA	CTDC75	18753778	2831820478	18620452	0.992891	1372018815	1372110168	2744128983	60527	11752057	0.631137	1360618368	5703970	0.485359	442675487	0.325349	7313.69	0.0014869	0.998513	0.996464	0.993623	0.989872	0.983644
cfDNA	CTDC75-2	20570560	3106154560	20407930	0.992094	1512633460	1512049837	3024683297	60527	13779536	0.675205	1582724637	6224462	0.451718	497012507	0.314023	8211.42	0.0029739	0.997026	0.995688	0.995539	0.988633	0.983545
cfDNA	CTDC76	9818182	1482545482	9720084	0.990009	718889622	718484505	1437374127	60527	6865171	0.706287	799127799	2446143	0.356312	192618169	0.241036	3182.35	0.0014869	0.998513	0.995457	0.991111	0.984255	0.980851
cfDNA	CTDC76-2	9073400	1370083400	8999358	0.99184	670092991	669863954	1339956945	60527	6152452	0.683655	833397453	2602866	0.423062	227758333	0.273289	3762.92	0.0029739	0.997026	0.995225	0.990467	0.984585	0.982107
cfDNA	CTDC77	17404372	2628060172	17204908	0.988539	1264212447	1263962284	2528174731	60527	9981462	0.580152	1159743251	3919167	0.392645	311426343	0.26853	5145.25	0.0014869	0.998513	0.994052	0.993276	0.982586	0.980604
cfDNA	CTDC77-2	22517018	3400069718	22367656	0.993367	1664230787	1663931470	3328162257	60527	11276953	0.504163	1270701811	5014607	0.444677	389506106	0.306528	6435.25	0.0016522	0.998348	0.994052	0.994036	0.988831	0.981215
cfDNA	CTDC78	19682754	2972095854	18751496	0.952687	1313749435	1313327236	2627076671	60527	16475130	0.878603	2133830558	11094510	0.67341	887218456	0.415787	14658.2	0.0007435	0.999256	0.994664	0.992797	0.985824	0.981843
cfDNA	CTDC78-2	16314408	2463475608	16114948	0.987774	1185402214	1185072918	2370475132	60527	5229100	0.324488	578169155	2320154	0.4437	177782888	0.307493	2937.25	0.0029739	0.997026	0.995457	0.991409	0.985824	0.980769
cfDNA	CTDC79	24139944	3645131544	23968082	0.992881	1776010607	1775215491	3551226098	60527	13507352	0.563556	1527075992	6616932	0.489876	512825498	0.335822	8472.67	0.0014869	0.998513	0.995242	0.993953	0.989426	0.982239
cfDNA	CTDC79-2	20984054	3168592154	20570784	0.980306	1520571724	1520081015	3040652739	60527	11907351	0.578848	1385017419	4964994	0.416969	397360553	0.286899	6565.01	0.0014869	0.998513	0.99625	0.995093	0.988798	0.983032
cfDNA	CTDC80	17670744	2668282344	17544388	0.992849	1299785786	1299377873	2599163659	60527	9008391	0.513463	1101386371	4314255	0.478915	357697225	0.32477	5909.71	0.0017017	0.998298	0.995308	0.993887	0.987394	0.982818
cfDNA	CTDC80-2	18677776	2820344176	18544096	0.992843	1372178633	1371868014	2744046647	60527	8897110	0.479781	1008799047	3852652	0.433023	303060989	0.300418	5007.04	0.0014869	0.998513	0.995143	0.991029	0.988765	0.983115
cfDNA	CTDC80-5	27768068	4192978268	27558552	0.992455	2025311406	2025078482	4050389888	60527	14797907	0.536962	1668173369	6128662	0.414157	475162694	0.28484	7850.43	0.0031391	0.996861	0.994201	0.99387	0.989228	0.983198
cfDNA	CTDC81	52818326	7975567226	52171510	0.987754	3728518823	3727689480	7456208303	60527	36434460	0.698359	4785853494	5208796	0.142963	459117263	0.0959322	7585.33	0.000413	0.999587	0.994184	0.99387	0.989228	0.982603
cfDNA	CTDC81-2	11859228	1790743428	11647682	0.982162	859631586	859146985	1718778571	60527	7103854	0.609894	816935155	3350429	0.471635	265520312	0.32502	4386.81	0.0018174	0.998183	0.993011	0.989492	0.982801	0.98143
cfDNA	CTDC82	13907582	2100044882	13735496	0.987626	997527016	997281999	1994809015	60527	9010419	0.655995	1050116644	4245835	0.471214	341280203	0.324993	5638.48	0.0029904	0.99701	0.993391	0.991756	0.984751	0.981562
cfDNA	CTDC82-2	21912976	3308859376	20856132	0.951771	1490830293	1490310161	2981140454	60527	17500651	0.839113	2173408807	851985	0.048683	67138393	0.0308908	1109.23	0.0030069	0.996993	0.985775	0.98138	0.977398	0.972376
cfDNA	CTDC83	13581838	2050857538	13469250	0.99171	982024767	981477137	1963501904	60527	9595695	0.712415	1220803029	4326135	0.450841	365047796	0.299023	6031.16	0.0025278	0.997472	0.99511	0.993243	0.985907	0.981182
cfDNA	CTDC83-2	12239870	1848220370	12156784	0.993212	900950929	900758182	1801709111	60527	7964543	0.655152	916421361	3675914	0.461535	292582836	0.319267	4833.92	0.0041139	0.995886	0.994217	0.990731	0.984635	0.98105
cfDNA	CTDC84	20522858	3098951558	20281194	0.988225	1473732632	1473349461	2947082093	60527	12050797	0.594186	1526788375	5509587	0.457197	462177230	0.302712	7635.89	0.0002974	0.999703	0.994052	0.993788	0.989063	0.981892
cfDNA	CTDC84-2	17815498	2690140198	17586386	0.98714	1299752049	1299480980	2599233029	60527	10772724	0.61256	1296418927	5112514	0.47458	415385909	0.32041	6862.82	0.0016687	0.998331	0.994069	0.992532	0.987989	0.981298
cfDNA	CTDC85	19002262	2869341562	18790640	0.988863	1260322614	1259645310	2519967924	60527	8513435	0.453068	955226759	1304981	0.153285	106195973	0.111174	1754.52	0.0003139	0.999686	0.997125	0.993639	0.992086	0.989856
cfDNA	CTDC85-2	20416830	3082941330	20157582	0.987302	1461023402	1460222850	2921246252	60527	10114071	0.50175	1124093011	3876021	0.383231	302924157	0.269483	5004.78	0.0014869	0.998513	0.995589	0.994036	0.992251	0.984817
cfDNA	CTDC85-3	12942520	1954320520	12668760	0.978848	898225527	897650472	1795875999	60527	9645962	0.761397	1104515760	2807004	0.291003	217230541	0.196675	3588.99	0.0014869	0.998513	0.995688	0.993491	0.986188	0.981479
cfDNA	CTDC86	18756796	2832276196	18560776	0.989549	1319232481	1318895537	2638128018	60527	10427537	0.561805	1322058263	4255364	0.408089	359164971	0.271671	5933.96	0.0007765	0.999224	0.996844	0.994251	0.990269	0.985114
cfDNA	CTDC86-2	511862	77291162	505074	0.986739	34184237	34167458	68351695	60527	225082	0.445642	26109932	35450	0.157498	2965016	0.113559	48.9867	0.011846	0.988154	0.956647	0.888595	0.380161	0.080906
cfDNA	CTDC87	18105022	2733858322	17861908	0.986572	1300800219	1300447529	2601247748	60527	11479140	0.64266	1351722710	4096203	0.356839	326325768	0.241415	5391.41	0.0015035	0.998497	0.994845	0.990797	0.984238	0.981
cfDNA	CTDC87-2	9811580	1481548580	9644346	0.982955	711366585	710890385	1422256970	60527	6011689	0.623338	690062151	2782875	0.462911	221355372	0.320776	3657.13	0.0024452	0.997555	0.992615	0.988617	0.982917	0.980901
cfDNA	CTDC88	14772040	2230578040	14647864	0.991594	1052795276	1052665915	2105461191	60527	12667702	0.864816	1456319541	6070228	0.479189	491693918	0.337628	8123.55	0.0018008	0.998199	0.995539	0.994746	0.989112	0.982223
cfDNA	CTDC88-2	17212420	2599075420	17046106	0.990338	1240391592	1239913446	2480305038	60527	11156412	0.654484	1283678300	5418793	0.485711	432909293	0.337241	7152.33	0.00152	0.99848	0.993804	0.990979	0.986271	0.981248
cfDNA	CTDC89	37875566	5719210466	37440266	0.988507	2519377414	2518157615	5037535029	60527	16730687	0.446863	1914256352	3428520	0.204924	284238372	0.148485	4696.06	1.65e-05	0.999984	0.998976	0.997538	0.994003	0.992384
cfDNA	CTDC89-2	21578782	3258396082	21351190	0.989453	1569192508	1568719496	3137912004	60527	10980130	0.514263	1253937573	4730741	0.430846	375945644	0.299812	6211.21	0.0014869	0.998513	0.995638	0.994052	0.992119	0.985362
cfDNA	CTDC90	20221732	3053481532	19991422	0.988611	1446593995	1446051393	2892645388	60527	11039828	0.552228	1265057704	4084809	0.370007	325196874	0.257061	5372.76	0.0029739	0.997026	0.994911	0.993061	0.992284	0.985362
cfDNA	CTDC90-2	21562228	3255896428	21411086	0.99299	1589435307	1588834373	3178269680	60527	11350316	0.530114	1351455473	5026779	0.442876	407038199	0.301185	6724.9	0.0036513	0.996349	0.994019	0.992863	0.99131	0.982537
cfDNA	CTDC91	17958382	2711715682	17831892	0.992956	1312818068	1312433605	2625251673	60527	10225900	0.573461	1322676799	4435851	0.433786	375062085	0.283563	6196.61	0.0041634	0.995837	0.993672	0.992268	0.986105	0.981479
cfDNA	CTDC91-2	19169982	2894667282	19028140	0.992601	1390271054	1389679917	2779950971	60527	10533136	0.553556	1203548944	4827392	0.458305	378402341	0.314405	6251.79	0.0017513	0.998249	0.993904	0.99245	0.986304	0.981232
cfDNA	CTDC92	18749890	2831233390	18627476	0.993471	1367495825	1367245213	2734741038	60527	15338080	0.823412	1180141433	6151101	0.401035	390862788	0.3312	6457.66	0.00152	0.99848	0.995539	0.994151	0.98708	0.981281
cfDNA	CTDC92-2	17742122	2679060422	17529444	0.988013	1283934113	1283732274	2567666387	60527	10159176	0.579549	1252759720	4936166	0.485883	414447961	0.330828	6847.32	0.0029739	0.997026	0.996696	0.995424	0.991111	0.982322
cfDNA	CTDC93	23179150	3500051650	22866752	0.986522	1677904123	1677079243	3354983366	60527	9905463	0.433182	1102175835	4153389	0.419303	320443862	0.290738	5294.23	0.0030565	0.996943	0.995143	0.992945	0.98328	0.981992
cfDNA	CTDC93-2	19806730	2990816230	19609458	0.99004	1450920196	1450515448	2901435644	60527	10946198	0.55821	1247034358	4705032	0.429833	369764445	0.296515	6109.08	0.0024948	0.997505	0.995539	0.994201	0.990203	0.981711
Tissue	FFPE_CTDC02	6045088	912808288	5094128	0.842689			656655099	41761	5093753	0.999926	362463425	358035	0.112492	28827729	0.0795328	690.303	0.005747	0.994253	0.984435	0.980053	0.974426	0.968966
Tissue	FFPE_CTDC03	6146322	928094622	5287654	0.860296			710515213	41761	5283690	0.99925	317278590	189224	0.0705714	15121071	0.0476587	362.086	0.00795	0.99205	0.984555	0.978185	0.971457	0.966907
Tissue	FT_CTDC04	7456838	1125982538	7381692	0.989923	529597766	529459902	1059057668	60527	7375989	0.999227	505691402	1045507	0.261656	86366833	0.17079	1426.91	0.0017348	0.998265	0.994763	0.991789	0.984073	0.979943
Tissue	FT_CTDC05	8116520	1225594520	8046244	0.991342	571395068	571281835	1142676903	60527	8038452	0.999032	585796958	2097034	0.45443	166750263	0.284655	2754.97	0.0017843	0.998216	0.991921	0.987757	0.98067	0.977299
Tissue	FFPE_CTDC06	5792738	874703438	4854016	0.837948	332986142	332630209	665616351	41761	4853290	0.99985	319677670	396001	0.15219	33454500	0.104651	801.094	0.0105361	0.989464	0.985992	0.979814	0.975527	0.971385
Tissue	FFPE_CTDC08	4938720	745746720	4404686	0.891868	306889151	306536102	613425253	41761	4403925	0.999827	441441108	546959	0.159769	46637580	0.105648	1116.77	0.0077584	0.992242	0.980101	0.978161	0.97342	0.971121
Tissue	FFPE_CTDC11	5772454	871640554	5696010	0.986757	251117863	251114471	502232334	60527	5688266	0.99864	199867803	263287	0.0671893	13678800	0.0684392	225.995	0.0030565	0.996943	0.988551	0.978406	0.912535	0.743701
Tissue	FFPE_CTDC13	5152816	778075216	4581920	0.889207	314533040	314216785	628749825	41761	4581329	0.999871	391126676	420724	0.134402	35370697	0.0904328	846.979	0.009267	0.990733	0.985034	0.97797	0.974761	0.970331
Tissue	FFPE_CTDC14	6423632	969968432	5803506	0.903462	407555644	407045639	814601283	41761	5802680	0.999858	544945403	743941	0.177303	64041834	0.11752	1533.53	0.0075429	0.992457	0.988171	0.981418	0.977467	0.974498
Tissue	FFPE_CTDC15	6365200	961145200	5599070	0.879638	392048160	391571960	783620120	41761	5598878	0.999966	497186986	544825	0.140322	46480190	0.0934863	1113	0.0074471	0.992553	0.984363	0.980364	0.97536	0.972055
Tissue	FT_CTDC16	7559434	1141474534	7488116	0.990566	536903503	536697675	1073601178	60527	7481757	0.999151	450905383	1217636	0.340741	102590825	0.227522	1694.96	0.0034034	0.996597	0.990533	0.985874	0.980438	0.97953
Tissue	FFPE_CTDC17	7007810	1058179310	5952716	0.84944	406117660	405507595	811625255	41761	5952488	0.999962	425697186	394450	0.114685	32681029	0.0767706	782.573	0.0080458	0.991954	0.985537	0.978952	0.975048	0.971433
Tissue	FFPE_CTDC18	6541454	987759554	6002880	0.917668	427812197	427170124	854982321	41761	6002671	0.999965	632722653	700111	0.146503	59408009	0.0938927	1422.57	0.0095544	0.990446	0.984842	0.981155	0.973564	0.970116
Tissue	FFPE_CTDC19	5885690	888739190	5240574	0.890392	368255323	367761947	736017270	41761	5240232	0.999935	592469287	585909	0.128902	50030576	0.0844442	1198.02	0.0050526	0.994947	0.981538	0.977252	0.973157	0.968847
Tissue	FFPE_CTDC20	5488514	828765614	4445102	0.809892	297111156	296750465	593861621	41761	4444253	0.999809	228608645	232531	0.118165	18855178	0.082478	451.502	0.0077584	0.992242	0.984004	0.980652	0.973636	0.967122
Tissue	FFPE_CTDC21	6330644	955927244	5576174	0.880823	383406484	382944191	766350675	41761	5575864	0.999944	478033472	558169	0.146079	47822255	0.10004	1145.14	0.0059864	0.994014	0.984363	0.981969	0.977539	0.972103
Tissue	FFPE_CTDC24	6273710	947330210	5569942	0.887823	389542440	388941538	778483978	41761	5569779	0.999971	520642294	631736	0.156427	53710244	0.103162	1286.13	0.0071598	0.99284	0.984387	0.980149	0.974953	0.97172
Tissue	FFPE_CTDC25	6527122	985595422	5874240	0.899974	416772752	416129506	832902258	41761	5874064	0.99997	575131664	710307	0.162629	61245205	0.106489	1466.56	0.0092431	0.990757	0.984004	0.979263	0.976318	0.972247
Tissue	FT_CTDC26	3606262	544545562	3567814	0.989339	249580037	249227887	498807924	60527	3565247	0.999281	274291152	994486	0.446041	78237322	0.285235	1292.6	0.0046756	0.995324	0.989625	0.984338	0.980389	0.974656
Tissue	FFPE_CTDC28	6382316	963729716	5739728	0.899317	392823344	392371767	785195111	41761	5739516	0.999963	535214743	908832	0.216504	73617104	0.137547	1762.82	0.0104404	0.98956	0.981705	0.979047	0.974594	0.968415
Tissue	FFPE_CTDC29	6799314	1026696414	6314516	0.928699	444889461	444400668	889290129	41761	6309923	0.999273	349046836	129236	0.0473417	10236148	0.029326	245.113	0.0085008	0.991499	0.981322	0.977539	0.96729	0.917746
Tissue	FFPE_CTDC34	3942998	595392698	3875090	0.982778	152207182	152128583	304335765	60527	3863853	0.9971	66002723	219023	0.10927	9914445	0.150213	163.802	0.0123416	0.987658	0.964214	0.933435	0.812365	0.591901
Tissue	FFPE_CTDC35	6035242	911321542	5969130	0.989046	389862028	389774348	779636376	60527	5961575	0.998734	504317159	683028	0.154452	55877169	0.110798	923.178	0.0033704	0.99663	0.988402	0.982504	0.979431	0.975829
Tissue	FT_CTDC36	6512426	983376326	6458210	0.991675	462610486	462453534	925064020	60527	6451979	0.999035	265004622	1438847	0.712686	112015236	0.422692	1850.67	0.0090538	0.990946	0.979266	0.974028	0.966081	0.942075
Tissue	FT_CTDC37	4330562	653914862	4287922	0.990154	304460826	304204701	608665527	60527	4285149	0.999353	338112640	852715	0.313023	70069840	0.207238	1157.66	0.0044773	0.995523	0.990748	0.985593	0.981033	0.977002
Tissue	FFPE_CTDC38	7227782	1091395082	7135654	0.987254	410811255	410844830	821656085	60527	7120271	0.997844	246190195	296355	0.0823732	18941029	0.0769366	312.935	0.0014869	0.998513	0.993887	0.990252	0.979959	0.931171
Tissue	FFPE_CTDC39	4477680	676129680	4411168	0.985146	210628912	210560586	421189498	60527	4397885	0.996989	82030352	146451	0.0794072	7319350	0.0892273	120.927	0.0055017	0.994498	0.977498	0.946536	0.768285	0.476663
Tissue	FFPE_CTDC40	198640	29994640	196088	0.987153	9328515	9321520	18650035	60527	195682	0.99793	5613886	12881	0.114095	714418	0.127259	11.8033	0.105374	0.894625	0.443372	0.191154	0.0189172	0.0010078
Tissue	FT_CTDC41	4061172	613236972	4023358	0.990689	284364821	284337848	568702669	60527	4020834	0.999373	338776682	734798	0.271702	61251285	0.180801	1011.97	0.0036347	0.996365	0.989344	0.984866	0.980868	0.978258
Tissue	FT_CTDC42	8350164	1260874764	8268256	0.990191	597591560	597446974	1195038534	60527	8262359	0.999287	580846039	1686965	0.374546	139987870	0.241007	2312.82	0.0016026	0.998397	0.993342	0.988319	0.981033	0.979893
Tissue	FT_CTDC43	8418396	1271177796	8326990	0.989142	594971339	594697616	1189668955	60527	8320781	0.999254	490876703	1038874	0.263317	84966505	0.173091	1403.78	0.002313	0.997687	0.992565	0.989426	0.982157	0.980422
Tissue	FFPE_CTDC45	6743648	1018290848	6594820	0.977931	285527330	285578660	571105990	60527	6581336	0.997955	324112233	76552	0.012314	4356853	0.0134424	71.982	0.0078312	0.992169	0.95331	0.867134	0.530738	0.21901
Tissue	FT_CTDC46	8384912	1266121712	8304404	0.990398	605872689	605707839	1211580528	60527	8298122	0.999244	616152684	1272250	0.267668	105799687	0.17171	1747.98	0.0010739	0.998926	0.994069	0.98827	0.982851	0.979629
Tissue	FT_CTDC47	8265904	1248151504	8188338	0.990616	590833706	590640445	1181474151	60527	8181762	0.999197	560545147	1276086	0.290391	106220992	0.189496	1754.94	0.0030895	0.996911	0.992152	0.989211	0.981628	0.978423
Tissue	FT_CTDC48	6971758	1052735458	6899696	0.989664	495640439	495507966	991148405	60527	6894250	0.999211	437534939	845236	0.243661	69577077	0.159021	1149.52	0.003486	0.996514	0.992417	0.989013	0.981066	0.978572
Tissue	FFPE_CTDC52	9080950	1371223450	8945770	0.985114	430530332	430603637	861133969	60527	8929052	0.998131	336911562	307382	0.0490505	15885419	0.0471501	262.452	0.0018008	0.998199	0.993573	0.987163	0.940407	0.773969
Tissue	FFPE_CTDC54	170476	25741876	168480	0.988292	8405908	8406023	16811931	60527	167987	0.997074	6925697	18946	0.1572	1063000	0.153486	17.5624	0.052869	0.947131	0.60573	0.313232	0.0623689	0.0041139
Tissue	FT_CTDC55	7599258	1147487958	7521720	0.989797	535434788	535322781	1070757569	60527	7516894	0.999358	380422162	781296	0.257374	63591167	0.167159	1050.62	0.0035521	0.996448	0.992664	0.989278	0.981	0.979051
Tissue	FFPE_CTDC57	3658848	552486048	3612834	0.987424	184168831	184119061	368287892	60527	3602029	0.997009	127055291	334604	0.149624	18245640	0.143604	301.446	0.0059478	0.994052	0.984503	0.970939	0.925455	0.809705
Tissue	FFPE_CTDC61	9248980	1396595980	8537320	0.923055	433580677	433385446	866966123	60527	8511107	0.99693	279856777	221397	0.0474043	11730922	0.0419176	193.813	0.0049069	0.995093	0.986105	0.96884	0.902044	0.702629
Tissue	FFPE_CTDC62	4526814	683548914	4472830	0.988075	225697212	225647886	451345098	60527	4454566	0.995917	178860577	281441	0.089135	15665460	0.0875848	258.818	0.006526	0.993474	0.97877	0.963487	0.904158	0.759793
Tissue	FT_CTDC63	3197056	482755456	3145638	0.983917	233141914	232942207	466084121	60527	3138470	0.997721	169331530	552862	0.22827	32099114	0.189564	530.327	0.0019165	0.998084	0.986254	0.981529	0.975961	0.970641
Tissue	FFPE_CTDC64	3964978	598711678	3920486	0.988779	228138928	228076473	456215401	60527	3912189	0.997884	216333722	198186	0.0695611	12374441	0.0572007	204.445	0.0038991	0.996101	0.992235	0.989459	0.940357	0.704677
Tissue	FT_CTDC66	7688740	1160999740	7618732	0.990895	552014779	551891180	1103905959	60527	7613234	0.999278	538386726	1288588	0.308843	108977273	0.202414	1800.47	0.00038	0.99962	0.993722	0.990417	0.980505	0.979546
Tissue	FFPE_CTDC67	4179804	631150404	4129914	0.988064	207379659	207320703	414700362	60527	4126519	0.999178	168945737	232539	0.0842152	13436494	0.0795314	221.992	0.0059478	0.994052	0.989971	0.980785	0.924249	0.738232
Tissue	FFPE_CTDC68	10596634	1600091734	10469058	0.987961	618975094	618864148	1237839242	60527	10449922	0.998172	413394267	877222	0.144177	49642223	0.120084	820.167	0.0014869	0.998513	0.992797	0.990599	0.981595	0.969369
Tissue	FT_CTDC69	7602928	1148042128	7530310	0.990449	540367623	540277288	1080644911	60527	7525031	0.999299	542150783	1317363	0.308479	111090241	0.204907	1835.38	0.0040478	0.995952	0.991343	0.989955	0.981529	0.979266
Tissue	FFPE_CTDC71	4791420	723504420	4704892	0.981941	269149662	269064742	538214404	60527	4692813	0.997433	200393841	245428	0.0779165	14040295	0.0700635	231.967	0.0025608	0.997439	0.977266	0.95483	0.875874	0.717548
Tissue	FFPE_CTDC72	3464722	523173022	3440824	0.993102	242841886	242781306	485623192	60527	3439238	0.999539	387501238	1265573	0.421656	109650015	0.282967	1811.59	0.0035191	0.996481	0.989971	0.98442	0.979282	0.977134
Tissue	FT_CTDC73	7639438	1153555138	7559102	0.989484	546133190	546022738	1092155928	60527	7553209	0.99922	507231611	1090241	0.27405	89863028	0.177164	1484.68	0.001553	0.998447	0.991789	0.986056	0.981331	0.979976
Tissue	FFPE_CTDC74	5401938	815692638	5325398	0.985831	319925085	319932626	639857711	60527	5295998	0.994479	277060360	234773	0.0635524	14891286	0.0537474	246.027	0.0021478	0.997852	0.990996	0.987212	0.969766	0.84483
Tissue	FT_CTDC75	7691562	1161425862	7612994	0.989785	540073027	539680446	1079753473	60527	7605751	0.999049	506074269	1239839	0.302617	100731317	0.199045	1664.24	0.0029904	0.99701	0.993689	0.992251	0.982999	0.980042
Tissue	FFPE_CTDC77	2990740	451601740	2953724	0.987623	182088126	181932372	364020498	60527	2951381	0.999207	170157778	286327	0.133063	18564759	0.109103	306.719	0.0029739	0.997026	0.991095	0.984899	0.959572	0.876716
Tissue	FT_CTDC79	2394624	361588224	2355928	0.98384	172260965	171935089	344196054	60527	2351541	0.998138	72687624	276624	0.302677	17734049	0.243976	292.994	0.0059808	0.994019	0.983726	0.981678	0.968626	0.917624
Tissue	FFPE_CTDC80	4980190	752008690	4945040	0.992942	326143243	326074160	652217403	60527	4941115	0.999206	287969646	767348	0.306077	62486975	0.216992	1032.38	0.0022635	0.997737	0.991277	0.98746	0.981545	0.977845
Tissue	FFPE_CTDC81	8432390	1273290890	8350774	0.990321	545588186	545306603	1090894789	60527	8332937	0.997864	348535504	1007691	0.198956	56318358	0.161586	930.467	0.0018008	0.998199	0.992681	0.986618	0.970129	0.955755
Tissue	FT_CTDC82	3076402	464536702	3042104	0.988851	225255575	224944636	450200211	60527	3034192	0.997399	112978981	381640	0.290234	25034164	0.221582	413.603	0.0059478	0.994052	0.982801	0.980505	0.978506	0.964495
Tissue	FFPE_CTDC83	4485986	677383886	4454344	0.992946	295586223	295537508	591123731	60527	4451864	0.999443	343264133	1201447	0.417263	99857649	0.290906	1649.8	0.006146	0.993854	0.99017	0.983958	0.980108	0.977019
Tissue	FFPE_CTDC84	3701538	558932238	3670646	0.991654	225852015	225751872	451603887	60527	3667503	0.999144	170883773	478587	0.202075	29685276	0.173716	490.447	0.0028748	0.997125	0.990318	0.981645	0.964776	0.929238
Tissue	FFPE_CTDC85	3527414	532639514	3493294	0.990327	236256277	236065472	472321749	60527	3490878	0.999308	172594382	467052	0.207342	28160062	0.163157	465.248	0.0063112	0.993689	0.985973	0.976473	0.957407	0.905811
Tissue	FFPE_CTDC86	116334	17566434	114968	0.988258	6861159	6858934	13720093	60527	114909	0.999487	6004099	11078	0.15167	819012	0.136409	13.5313	0.0469543	0.953046	0.528541	0.218431	0.0202059	0.0025278
Tissue	FFPE_CTDC87	7133038	1077088738	7048344	0.988127	498064949	497781924	995846873	60527	7030119	0.997414	247825431	646009	0.175294	33803516	0.136401	558.487	0.0035026	0.996497	0.991624	0.988286	0.971847	0.907711
Tissue	FFPE_CTDC89	3588742	541900042	3557610	0.991325	233109162	232969646	466078808	60527	3554636	0.999164	198787550	637208	0.241383	38846403	0.195417	641.803	0.0022139	0.997786	0.992301	0.987031	0.97416	0.933501
Tissue	FFPE_CTDC90	3517840	531193840	3486204	0.991007	221178386	221053733	442232119	60527	3483487	0.999221	190662397	540009	0.220573	34200192	0.179376	565.04	0.0036678	0.996332	0.991904	0.984453	0.971748	0.953426
Tissue	FFPE_CTDC92	3223792	486792592	3192106	0.990171	205625618	205494086	411119704	60527	3188508	0.998873	173856350	446332	0.199775	28433991	0.163549	469.774	0.0026269	0.997373	0.992483	0.984701	0.97611	0.951757
Tissue	FFPE_CTDC93	4719394	712628494	4664730	0.988417	232377475	232358395	464735870	60527	4647563	0.99632	144101906	432734	0.162347	23409865	0.162454	386.767	0.0031391	0.996861	0.988567	0.976391	0.948122	0.880037
PBMC	PBMC_CTDC01	6164968	930910168	6099322	0.989352	430009981	429775203	859785184	60527	6042631	0.990705	576983794	799803	0.139315	55683340	0.0965076	919.975	0.0022635	0.997737	0.985131	0.980851	0.979249	0.968824
PBMC	PBMC_CTDC02	9249566	1396684466	9207364	0.995437	686592519	686223804	1372816323	41761	9204656	0.999706	1145579704	911615	0.112924	76562877	0.0668333	1833.36	0.005292	0.994708	0.986255	0.981586	0.977922	0.973612
PBMC	PBMC_CTDC03	8260414	1247322514	8217110	0.994758	615507988	615142247	1230650235	41761	8215509	0.999805	757047063	1168128	0.218941	98169139	0.129674	2350.74	0.0043102	0.99569	0.98604	0.9841	0.978066	0.974689
PBMC	PBMC_CTDC04	8095458	1222414158	8050836	0.994488	601165611	600784477	1201950088	41761	8049269	0.999805	677787400	1001222	0.208523	83991970	0.123921	2011.25	0.0054117	0.994588	0.985106	0.981179	0.97797	0.973636
PBMC	PBMC_CTDC05	5454144	823575744	5390004	0.98824	383381829	383159816	766541645	60527	5339700	0.990667	482506953	778491	0.160828	52548095	0.108906	868.176	0.0052208	0.994779	0.986436	0.983627	0.979199	0.970922
PBMC	PBMC_CTDC06	7908332	1194158132	7866406	0.994699	588802349	588433779	1177236128	41761	7865164	0.999842	639626359	1089029	0.240934	91476649	0.143016	2190.48	0.0012691	0.998731	0.988099	0.980987	0.97809	0.973037
PBMC	PBMC_CTDC07	5511188	832189388	5448552	0.988635	387853582	387649588	775503170	60527	5398716	0.990853	516588361	759738	0.149785	52024082	0.100707	859.519	0.003453	0.996547	0.984767	0.981859	0.978869	0.967866
PBMC	PBMC_CTDC08	8118574	1225904674	8075614	0.994708	603317926	602974014	1206291940	41761	8073768	0.999771	800569215	967180	0.17132	81214947	0.101447	1944.76	0.0052441	0.994756	0.984603	0.982136	0.977132	0.970714
PBMC	PBMC_CTDC09	24807550	3745940050	24536316	0.989066	1743262925	1742333079	3485596004	60527	24246567	0.988191	1603013241	1762398	0.110303	121403712	0.0757347	2005.78	0.0031556	0.996844	0.991128	0.984404	0.981298	0.97953
PBMC	PBMC_CTDC10	8202484	1238575084	8156764	0.994426	609752020	609357837	1219109857	41761	8155155	0.999803	764870041	1207820	0.223391	101260303	0.132389	2424.76	0.0044779	0.995522	0.984172	0.984028	0.97809	0.975719
PBMC	PBMC_CTDC11	7468594	1127757694	7424784	0.994134	555488671	555115150	1110603821	41761	7423542	0.999833	522834634	942130	0.254421	78858210	0.150828	1888.32	0.0054836	0.994516	0.984148	0.980987	0.978066	0.973684
PBMC	PBMC_CTDC12	7739346	1168641246	7695004	0.994271	574473633	574054561	1148528194	41761	7693719	0.999833	468418420	836159	0.250273	70059547	0.149566	1677.63	0.0049328	0.995067	0.985944	0.978377	0.978066	0.975551
PBMC	PBMC_CTDC13	8504830	1284229330	8454466	0.994078	631796466	631236672	1263033138	41761	8452898	0.999815	448616160	799357	0.249358	67112459	0.149599	1607.06	0.0048849	0.995115	0.986159	0.98034	0.977946	0.971193
PBMC	PBMC_CTDC14	7969302	1203364602	7925922	0.994557	593230898	592802529	1186033427	41761	7924553	0.999827	539283483	883598	0.230503	74100258	0.137405	1774.39	0.0027298	0.99727	0.989201	0.977491	0.975072	0.965973
PBMC	PBMC_CTDC15	7452710	1125359210	7410202	0.994296	553365983	552957532	1106323515	41761	7408763	0.999806	543024176	869894	0.225713	73037592	0.134502	1748.94	0.0045258	0.995474	0.984124	0.979383	0.977922	0.972582
PBMC	PBMC_CTDC16	6691064	1010350664	6652324	0.99421	496951793	496564588	993516381	41761	6651409	0.999862	420941805	768919	0.257188	64663502	0.153616	1548.42	0.007495	0.992505	0.982065	0.977922	0.973157	0.966787
PBMC	PBMC_CTDC17	8499366	1283404266	8452638	0.994502	631480747	631057235	1262537982	41761	8450883	0.999792	655124923	986406	0.212581	82856077	0.126474	1984.05	0.0018438	0.998156	0.986351	0.979215	0.977467	0.972917
PBMC	PBMC_CTDC18	7625050	1151382550	7581452	0.994282	565324353	564877561	1130201914	41761	7580353	0.999855	519842613	893914	0.241325	75060646	0.144391	1797.39	0.0067767	0.993223	0.983358	0.9807	0.978233	0.974019
PBMC	PBMC_CTDC19	7394254	1116532354	7349148	0.9939	548848202	548417252	1097265454	41761	7347675	0.9998	560472095	959724	0.241501	80258748	0.143198	1921.86	0.0026101	0.99739	0.988171	0.982639	0.978066	0.973684
PBMC	PBMC_CTDC20	7971104	1203636704	7926830	0.994446	592274585	591860300	1184134885	41761	7925156	0.999789	624802297	1028668	0.232288	86214152	0.137986	2064.47	0.004837	0.995163	0.985585	0.981586	0.97797	0.973564
PBMC	PBMC_CTDC21	7702076	1163013476	7656582	0.994093	571722421	571245373	1142967794	41761	7655280	0.99983	458774605	859326	0.26278	72109907	0.157179	1726.73	0.0051483	0.994852	0.986159	0.978353	0.97809	0.973779
PBMC	PBMC_CTDC22	4888560	738172560	4831336	0.988294	347691095	347478954	695170049	60527	4786184	0.990654	459032802	674413	0.149979	45874666	0.0999377	757.921	0.0042295	0.995771	0.984866	0.980538	0.975978	0.964644
PBMC	PBMC_CTDC23	6645148	1003417348	6575964	0.989589	463124531	462956451	926080982	60527	6518437	0.991252	627813532	1209332	0.196136	84639860	0.134817	1398.38	0.0028417	0.997158	0.988055	0.983132	0.979315	0.97568
PBMC	PBMC_CTDC24	7663038	1157118738	7622210	0.994672	569865523	569487877	1139353400	41761	7621274	0.999877	483069379	886090	0.258758	74446812	0.154112	1782.69	0.0029693	0.997031	0.982591	0.979335	0.978066	0.973612
PBMC	PBMC_CTDC25	7316120	1104734120	7272296	0.99401	542836502	542437630	1085274132	41761	7271107	0.999837	470557079	854278	0.254372	71669018	0.152307	1716.17	0.007495	0.992505	0.986327	0.982759	0.978233	0.973875
PBMC	PBMC_CTDC26	7584404	1145245004	7544862	0.994786	561959942	561591129	1123551071	41761	7543174	0.999776	532895377	704693	0.18464	59187451	0.111068	1417.29	0.0110869	0.988913	0.984124	0.980364	0.97718	0.97445
PBMC	PBMC_CTDC27	8374418	1264537118	8330122	0.994711	621319790	620915357	1242235147	41761	8327927	0.999736	662526389	833712	0.176681	69734130	0.105255	1669.84	0.0051005	0.9949	0.981993	0.979095	0.976174	0.973779
PBMC	PBMC_CTDC28	7019062	1059878362	6980022	0.994438	521102784	520717098	1041819882	41761	6978795	0.999824	506894143	904061	0.251541	75808978	0.149556	1815.31	0.0032566	0.996743	0.986375	0.979024	0.978066	0.973684
PBMC	PBMC_CTDC29	8756422	1322219722	8708214	0.994495	650322211	649969174	1300291385	41761	8706586	0.999813	569523691	978968	0.241963	82049439	0.144067	1964.74	0.0069682	0.993032	0.98513	0.981011	0.978161	0.973827
PBMC	PBMC_CTDC30	8391166	1267066066	8296996	0.988777	587912130	587571231	1175483361	60527	8213820	0.989975	771889358	1243071	0.163681	85803042	0.11116	1417.6	0.0032713	0.996729	0.986766	0.982685	0.979811	0.976292
PBMC	PBMC_CTDC31	54009194	8155388294	53226386	0.985506	3794470556	3791604811	7586075367	60527	52478505	0.985949	3016968617	4732556	0.155914	324221964	0.107466	5356.65	0.0015035	0.998497	0.996514	0.994333	0.98746	0.983247
PBMC	PBMC_CTDC32	3744058	565352758	3687494	0.984892	255837457	255614127	511451584	60527	3628446	0.983987	326117647	524962	0.151387	34909608	0.107046	576.761	0.0047582	0.995242	0.983677	0.981165	0.973202	0.955359
PBMC	PBMC_CTDC33	4561724	688820324	4503348	0.987203	319526735	319314542	638841277	60527	4444857	0.987012	419275770	510542	0.119899	33914853	0.0808891	560.326	0.0048078	0.995192	0.983511	0.980719	0.972112	0.942274
PBMC	PBMC_CTDC34	5772456	871640856	5703768	0.988101	398230772	397995326	796226098	60527	5625788	0.986328	524552192	786273	0.145015	53516424	0.102023	884.174	0.0021478	0.997852	0.986799	0.982041	0.977845	0.969799
PBMC	PBMC_CTDC35	4818412	727580212	4762134	0.98832	340216423	340025554	680241977	60527	4715020	0.990107	451063992	665898	0.149501	45661397	0.10123	754.397	0.0035521	0.996448	0.984371	0.981694	0.977299	0.967221
PBMC	PBMC_CTDC36	4018588	606806788	3967534	0.987296	276043303	275808878	551852181	60527	3923550	0.988914	356103302	702884	0.190425	47166820	0.132453	779.269	0.0054191	0.994581	0.983611	0.981314	0.975779	0.961224
PBMC	PBMC_CTDC37	3520642	531616942	3480104	0.988486	244244372	244047577	488291949	60527	3443781	0.989563	325833753	380091	0.112342	25233719	0.0774435	416.9	0.0058652	0.994135	0.982669	0.979381	0.964479	0.911296
PBMC	PBMC_CTDC38	4977202	751557502	4918450	0.988196	344385173	344138827	688524000	60527	4870074	0.990164	464885749	448021	0.0938263	29872410	0.0642575	493.539	0.004246	0.995754	0.98556	0.981678	0.969187	0.922101
PBMC	PBMC_CTDC39	3609324	545007924	3561982	0.986883	247917673	247720119	495637792	60527	3512412	0.986084	321595548	497407	0.14588	32560395	0.101246	537.948	0.0044608	0.995539	0.983726	0.979398	0.971054	0.929635
PBMC	PBMC_CTDC41	4207856	635386256	4151618	0.986635	291349883	291170664	582520547	60527	4106964	0.989244	391525102	312026	0.0767538	20669103	0.0527913	341.486	0.0065756	0.993424	0.98214	0.977795	0.950022	0.85157
PBMC	PBMC_CTDC42	3589166	541964066	3541334	0.986673	248502583	248298431	496801014	60527	3495943	0.987183	328728006	334764	0.0968976	21867507	0.0665216	361.285	0.0058321	0.994168	0.982983	0.978373	0.950105	0.859897
PBMC	PBMC_CTDC43	4310430	650874930	4275426	0.991879	311570801	311417369	622988170	60527	4271688	0.999126	493780995	1153197	0.295871	94880684	0.192151	1567.58	0.0063112	0.993689	0.986023	0.983445	0.97991	0.977679
PBMC	PBMC_CTDC44	2949446	445366346	2914500	0.988152	204216843	204029833	408246676	60527	2876002	0.986791	270529940	228462	0.0803975	14894584	0.0550571	246.082	0.0091199	0.99088	0.979645	0.970294	0.920977	0.772994
PBMC	PBMC_CTDC45	1957224	295540824	1929366	0.985767	135192435	135068762	270261197	60527	1901192	0.985397	173798423	274067	0.147478	17511332	0.100757	289.314	0.0090042	0.990996	0.980505	0.975829	0.94348	0.837758
PBMC	PBMC_CTDC46	5890978	889537678	5820704	0.988071	412280176	411983346	824263522	60527	5768246	0.990988	548859610	950014	0.173563	64864444	0.11818	1071.66	0.0037339	0.996266	0.985924	0.984371	0.979679	0.974623
PBMC	PBMC_CTDC47	6440224	972473824	6348212	0.985713	447304587	446854882	894159469	60527	6269390	0.987584	576378236	880775	0.14839	59112158	0.102558	976.625	0.0029904	0.99701	0.988319	0.983214	0.979431	0.972227
PBMC	PBMC_CTDC48	6428864	970758464	6353090	0.988213	450298470	449987418	900285888	60527	6297026	0.991175	598705043	828542	0.137542	56529102	0.094419	933.949	0.0030069	0.996993	0.988716	0.983098	0.979513	0.971467
PBMC	PBMC_CTDC49	10664796	1610384196	10485876	0.983223	751789901	751211239	1503001140	60527	10470078	0.998493	515716650	1691735	0.399205	142700846	0.276704	2357.64	0.0017513	0.998249	0.991822	0.986948	0.980604	0.979315
PBMC	PBMC_CTDC50	9716224	1467149824	9594592	0.987482	677275701	676498705	1353774406	60527	9579398	0.998416	360900899	1376297	0.449899	111414164	0.308711	1840.73	0.0045599	0.99544	0.99012	0.985544	0.980505	0.980323
PBMC	PBMC_CTDC51	10267260	1550356260	10157950	0.989354	722856962	722506603	1445363565	60527	10138408	0.998076	515101402	1787284	0.433059	149938286	0.291085	2477.21	0.0017843	0.998216	0.993689	0.986006	0.982586	0.981446
PBMC	PBMC_CTDC52	6319834	954294934	6250904	0.989093	448117286	447882357	895999643	60527	6240834	0.998389	418438498	1483299	0.455595	125069031	0.298895	2066.33	0.0018339	0.998166	0.991607	0.986733	0.981992	0.981248
PBMC	PBMC_CTDC53	7358168	1111083368	7271076	0.988164	522082718	521776776	1043859494	60527	7260582	0.998557	293373386	991190	0.371054	77850485	0.265363	1286.21	0.0015695	0.99843	0.991904	0.987146	0.982058	0.979117
PBMC	PBMC_CTDC54	4994424	754158024	4908782	0.982852	358291316	357941008	716232324	60527	4897680	0.997738	178397791	646874	0.375584	48237034	0.27039	796.951	0.0053695	0.99463	0.985147	0.981545	0.97948	0.975614
PBMC	PBMC_CTDC55-2	10216484	1542689084	10123276	0.990877	725212498	725015974	1450228472	60527	10112198	0.998906	528147845	1889851	0.443623	156766988	0.296824	2590.03	0.0024948	0.997505	0.99055	0.982339	0.980141	0.980059
PBMC	PBMC_CTDC56	10251222	1547934522	10120548	0.987253	729616248	729104716	1458720964	60527	10098216	0.997793	277344915	1048403	0.364216	77845451	0.280681	1286.13	0.0016356	0.998364	0.992433	0.985626	0.98181	0.979761
PBMC	PBMC_CTDC57	9319108	1407185308	9196842	0.98688	665667145	665233739	1330900884	60527	9180901	0.998267	344211918	1262005	0.411041	101097403	0.293707	1670.29	0.0029904	0.99701	0.992119	0.987956	0.982619	0.980686
PBMC	PBMC_CTDC58	6608836	997934236	6528870	0.9879	471176672	470933580	942110252	60527	6519909	0.998627	391369113	1414095	0.459691	119446505	0.305202	1973.44	0.0021313	0.997869	0.989608	0.982421	0.980092	0.979348
PBMC	PBMC_CTDC59	11377316	1717974716	11231304	0.987166	814161508	813758435	1627919943	60527	11213192	0.998387	473366472	1569622	0.414405	131317422	0.277412	2169.57	0.0020156	0.997984	0.993111	0.984321	0.981446	0.980505
PBMC	PBMC_CTDC60	10947912	1653134712	10786442	0.985251	779211651	778871796	1558083447	60527	10775151	0.998953	491030436	1579821	0.393852	131418387	0.267638	2171.24	0.0033043	0.996696	0.99017	0.987295	0.982074	0.979497
PBMC	PBMC_CTDC61	5476342	826927642	5381870	0.982749	387444739	387091930	774536669	60527	5373160	0.998382	187634004	629287	0.347406	47963588	0.255623	792.433	0.0037339	0.996266	0.986452	0.982702	0.980075	0.97611
PBMC	PBMC_CTDC62	8935258	1349223958	8824130	0.987563	622516793	622365590	1244882383	60527	8814655	0.998926	399198120	1461384	0.445972	121550198	0.304486	2008.2	0.0023791	0.997621	0.990583	0.983379	0.980108	0.979249
PBMC	PBMC_CTDC63	8723122	1317191422	8628350	0.989136	621947558	621615375	1243562933	60527	8615213	0.998477	453734365	1590734	0.446776	134357023	0.296114	2219.79	0.0033208	0.996679	0.990054	0.982933	0.981579	0.981116
PBMC	PBMC_CTDC64	5627488	849750688	5562594	0.988468	398287689	398165967	796453656	60527	5554882	0.998614	307000920	1143453	0.463942	96294332	0.313661	1590.93	0.0039817	0.996018	0.987493	0.981661	0.980505	0.979051
PBMC	PBMC_CTDC65	4909648	741356848	4854086	0.988683	350549272	350393020	700942292	60527	4845772	0.998287	235529241	774877	0.357983	60482888	0.256796	999.271	0.0033374	0.996663	0.984387	0.981529	0.979761	0.979001
PBMC	PBMC_CTDC66	5156786	778674686	5085268	0.986131	366460293	366225872	732686165	60527	5078215	0.998613	225236467	780593	0.409525	63769959	0.283124	1053.58	0.0017513	0.998249	0.987791	0.982405	0.979761	0.977845
PBMC	PBMC_CTDC67	8091832	1221866632	8000570	0.988722	564044539	563715541	1127760080	60527	7985198	0.998079	418864758	1578078	0.450906	133543649	0.318823	2206.35	0.0011069	0.998893	0.986188	0.981281	0.980125	0.979266
PBMC	PBMC_CTDC68-2	5573218	841555918	5454888	0.978768	392950011	392413988	785363999	60527	5445260	0.998235	190791005	612124	0.333857	46508403	0.243766	768.391	0.003486	0.996514	0.987906	0.98138	0.979381	0.977266
PBMC	PBMC_CTDC69	9247346	1396349246	9143216	0.988739	655503272	655343893	1310847165	60527	9131859	0.998758	401239663	1393249	0.426981	117502773	0.292849	1941.33	0.0018504	0.99815	0.989988	0.983363	0.98024	0.979266
PBMC	PBMC_CTDC70	19503562	2945037862	19232532	0.986104	1392696610	1391857413	2784554023	60527	19191719	0.997878	296421031	1139237	0.352959	84527526	0.28516	1396.53	0.0008756	0.999124	0.990765	0.98637	0.981876	0.979348
PBMC	PBMC_CTDC71	6359744	960321344	6274534	0.986602	451847599	451615503	903463102	60527	6264484	0.998398	283317475	1045719	0.433933	86358432	0.304812	1426.78	0.0033539	0.996646	0.986849	0.982933	0.979398	0.977778
PBMC	PBMC_CTDC72	5394228	814528428	5294908	0.981588	380114934	379700143	759815077	60527	5284573	0.998048	192940138	721528	0.385597	55018854	0.28516	908.997	0.0049565	0.995043	0.984652	0.98257	0.979365	0.977696
PBMC	PBMC_CTDC73	5649518	853077218	5567784	0.985533	405564831	405255955	810820786	60527	5554567	0.997626	237745825	900675	0.401742	70306514	0.295721	1161.57	0.0034695	0.99653	0.983264	0.981529	0.979695	0.975251
PBMC	PBMC_CTDC74	6235070	941495570	6167190	0.989113	438748184	437665062	876413246	60527	6157987	0.998508	440286403	1081656	0.290562	88343012	0.200649	1459.56	0.00152	0.99848	0.987774	0.984156	0.979365	0.978307
PBMC	PBMC_CTDC75	7184388	1084842588	7127910	0.992139	514898994	514697254	1029596248	60527	7119303	0.998792	299425160	1076053	0.444316	91472634	0.305494	1511.27	0.0006278	0.999372	0.990484	0.985643	0.979348	0.977993
PBMC	PBMC_CTDC76	9883958	1492477658	9821140	0.993644	705988367	705796054	1411784421	60527	9809580	0.998823	402468796	1484653	0.467875	126519731	0.314359	2090.3	0.0044608	0.995539	0.990368	0.983809	0.980984	0.979282
PBMC	PBMC_CTDC77	9850952	1487493752	9793294	0.994147	717482928	717267224	1434750152	60527	9776218	0.998256	420152136	1544385	0.452462	130752353	0.311202	2160.23	0.0024452	0.997555	0.992384	0.985345	0.980207	0.979298
PBMC	PBMC_CTDC78	8363378	1262870078	8307462	0.993314	599553360	599360026	1198913386	60527	8296558	0.998687	363738388	1382422	0.463954	116763243	0.321009	1929.11	0.0013217	0.998678	0.986948	0.984007	0.981611	0.978869
PBMC	PBMC_CTDC79	8899202	1343779502	8842458	0.993624	644476225	644273602	1288749827	60527	8831418	0.998751	433162230	1582084	0.459288	134374842	0.310218	2220.08	0.0016026	0.998397	0.991359	0.984057	0.980108	0.97991
PBMC	PBMC_CTDC80	9026912	1363063712	8970608	0.993763	651206761	650990046	1302196807	60527	8955614	0.998329	277870770	996378	0.445416	84297025	0.303368	1392.72	0.0008591	0.999141	0.98594	0.982586	0.979497	0.977746
PBMC	PBMC_CTDC81	5614944	847856544	5591950	0.995905	404428203	404304920	808733123	60527	5587004	0.999116	334225269	1146631	0.451462	99498337	0.297698	1643.87	0.0031226	0.996877	0.989608	0.982685	0.981595	0.979464
PBMC	PBMC_CTDC82	5719310	863615810	5694788	0.995712	406515069	406414385	812929454	60527	5689567	0.999083	280575977	972241	0.450034	84527471	0.301264	1396.53	0.0024782	0.997522	0.984883	0.981562	0.980306	0.97649
PBMC	PBMC_CTDC83	4170186	629698086	4125804	0.989357	293817488	293481497	587298985	60527	4119296	0.998423	284988904	703939	0.265515	55116386	0.193398	910.608	0.0051712	0.994829	0.985444	0.982504	0.979365	0.976275
PBMC	PBMC_CTDC84	3209272	484600072	3167832	0.987087	230193770	229858685	460052455	60527	3163859	0.998746	148984000	440011	0.327242	36104934	0.242341	596.51	0.0043121	0.995688	0.984123	0.980323	0.977762	0.969518
PBMC	PBMC_CTDC85	8932944	1348874544	8873090	0.9933	617267347	617109907	1234377254	60527	8860917	0.998628	597522123	1383755	0.281684	115560371	0.193399	1909.24	0.0013713	0.998629	0.991326	0.984305	0.981579	0.979877
PBMC	PBMC_CTDC86	5217258	787805958	5196214	0.995966	373601614	373519479	747121093	60527	5191473	0.999088	334445286	1209423	0.472683	105268699	0.314756	1739.2	0.0032052	0.996795	0.9867	0.983065	0.980108	0.977465
PBMC	PBMC_CTDC87	4282900	646717900	4250844	0.992515	308744995	308501985	617246980	60527	4243970	0.998383	235887473	780569	0.394019	65072526	0.275863	1075.1	0.0015365	0.998463	0.988865	0.981017	0.979761	0.97573
PBMC	PBMC_CTDC88	3570218	539102918	3537012	0.990699	257979649	257760903	515740552	60527	3532489	0.998721	152466011	532255	0.402898	43079955	0.282554	711.748	0.0024617	0.997538	0.983396	0.980389	0.978125	0.970955
PBMC	PBMC_CTDC89	5448134	822668234	5420668	0.994959	386665780	386425235	773091015	60527	5415928	0.999126	353341984	1196560	0.425969	103437464	0.29274	1708.95	0.0005948	0.999405	0.993094	0.985792	0.980505	0.979596
PBMC	PBMC_CTDC90	6062920	915500920	6038284	0.995937	435888106	435778847	871666953	60527	6027472	0.998209	401265633	1358639	0.439743	117894574	0.293807	1947.8	0.0044608	0.995539	0.990104	0.984387	0.980505	0.979579
PBMC	PBMC_CTDC91	3809152	575181952	3776012	0.9913	270527063	270323797	540850860	60527	3771804	0.998886	183071721	637169	0.420197	53593008	0.292743	885.44	0.0035852	0.996415	0.984189	0.98105	0.977812	0.971286
PBMC	PBMC_CTDC92	5441904	821727504	5418454	0.995691	386897845	386798262	773696107	60527	5413581	0.999101	369939823	1321181	0.46531	114688644	0.31002	1894.83	0.0012061	0.998794	0.992846	0.983082	0.981463	0.979398
PBMC	PBMC_CTDC93	5385278	813176978	5359246	0.995166	379602430	379472632	759075062	60527	5352635	0.998766	245316444	616593	0.313525	50797366	0.207069	839.251	0.0044773	0.995523	0.987031	0.981512	0.97269	0.9526
