# Supplementary material for: Circulating tumor DNA sequencing in colorectal cancer patients treated with first-line chemotherapy with anti-EGFR
Source: Sci Rep. 2021 Aug 11;11:16333. doi: 10.1038/s41598-021-95345-4 (PMC8358023; doi:10.1038/s41598-021-95345-4)
Supplement: Supplementary file 4 — Supplementary Table 3. [file 41598_2021_95345_MOESM4_ESM.xlsx]

## Sheet: Suppl. Table 3
ID	Chr	Pos_start	Pos_end	Ref	Alt	Mutation type	Gene	Transcript	Base change	AA change	Total reads	Ref. reads	Var. reads	VAF(%)	dbSNP	ClinVar annotation
CTDC01	5	112175490	112175490	C	A	stop_gained	APC	NM_000038.5	c.4199C>A	p.Ser1400*	5180	5108	69	1.33	NA	NA
CTDC01	17	7578406	7578406	C	T	missense_variant	TP53	NM_000546.5	c.524G>A	p.Arg175His	5129	5055	74	1.44	rs28934578	Pathogenic/ Likely_pathogenic
CTDC04	5	112090592	112090592	C	T	missense_variant	APC	NM_000038.5	c.5C>T	p.Ala2Val	2584	2465	118	4.57	NA	NA
CTDC04	5	112151261	112151261	C	T	stop_gained	APC	NM_000038.5	c.904C>T	p.Arg302*	6984	6697	286	4.1	rs137854568	Pathogenic
CTDC04	5	112175891	112175891	G	-	frameshift_variant	APC	NM_000038.5	c.4602delG	p.Asn1535fs	3144	3035	109	3.47	NA	NA
CTDC04	5	112176660	112176660	-	A	frameshift_variant	APC	NM_000038.5	c.5375dupA	p.Asn1792fs	1287	1256	21	1.63	NA	NA
CTDC04	17	7578212	7578212	G	A	stop_gained	TP53	NM_000546.5	c.637C>T	p.Arg213*	4779	4554	217	4.54	rs397516436	Pathogenic
CTDC05	5	112175423	112175423	C	T	stop_gained	APC	NM_000038.5	c.4132C>T	p.Gln1378*	1734	1704	30	1.73	rs121913329	Likely_pathogenic
CTDC05	5	112175760	112175787	ATTTTGCC ACGGAAAG TACTCCAG ATGG	-	frameshift_variant	APC	NM_000038.5	c.4474_4501delGCCACGGAAAGTACTCCAGATGGATTTT	p.Ala1492fs	2840	2806	32	1.13	NA	NA
CTDC05	17	7577056	7577056	-	T	frameshift_variant	TP53	NM_000546.5	c.881dupA	p.Pro295fs	2469	2390	77	3.12	NA	NA
CTDC05	17	37881000	37881000	G	T	missense_variant	ERBB2	NM_004448.2	c.2329G>T	p.Val777Leu	3135	2285	850	27.11	rs121913471	Conflicting _interpretations _of_pathogenicity
CTDC06	5	112175171	112175171	C	T	stop_gained	APC	NM_000038.5	c.3880C>T	p.Gln1294*	2865	2364	501	17.49	NA	Pathogenic
CTDC06	17	7577532	7577532	G	A	missense_variant	TP53	NM_000546.5	c.749C>T	p.Pro250Leu	2843	2495	348	12.24	NA	Uncertain_significance
CTDC06	17	7578475	7578475	G	A	missense_variant	TP53	NM_000546.5	c.455C>T	p.Pro152Leu	2645	2484	161	6.09	rs587782705	Pathogenic
CTDC07	5	112175639	112175639	C	T	stop_gained	APC	NM_000038.5	c.4348C>T	p.Arg1450*	3902	2539	1358	34.8	rs121913332	Pathogenic/ Likely_pathogenic
CTDC07	17	7577094	7577094	G	A	missense_variant	TP53	NM_000546.5	c.844C>T	p.Arg282Trp	3549	2209	1339	37.73	rs28934574	Conflicting _interpretations _of_pathogenicity
CTDC08	5	112175951	112175951	-	A	frameshift_variant	APC	NM_000038.5	c.4666dupA	p.Thr1556fs	3710	3284	423	11.4	NA	NA
CTDC08	7	140453136	140453136	A	T	missense_variant	BRAF	XM_005250045.1	c.1799T>A	p.Val600Glu	6293	5243	1050	16.69	rs113488022	Pathogenic/ Likely_pathogenic
CTDC09	5	112175639	112175639	C	T	stop_gained	APC	NM_000038.5	c.4348C>T	p.Arg1450*	5676	1465	4211	74.19	rs121913332	Pathogenic/ Likely_pathogenic
CTDC09	17	7578376	7578379	CTAT	-	frameshift_variant	TP53	NM_000546.5	c.551_554delATAG	p.Asp184fs	3840	1685	2154	56.09	NA	NA
CTDC10	17	7577570	7577570	C	T	missense_variant	TP53	NM_000546.5	c.711G>A	p.Met237Ile	2476	2098	378	15.27	rs587782664	Conflicting _interpretations _of_pathogenicity
CTDC11	17	7577120	7577120	C	T	missense_variant	TP53	NM_000546.5	c.818G>A	p.Arg273His	4004	2269	1735	43.33	rs28934576	Pathogenic/ Likely_pathogenic
CTDC11	17	7577574	7577574	T	C	missense_variant	TP53	NM_000546.5	c.707A>G	p.Tyr236Cys	3769	2877	891	23.64	NA	Likely_pathogenic
CTDC12	17	7577560	7577560	A	G	missense_variant	TP53	NM_000546.5	c.721T>C	p.Ser241Pro	1887	1242	644	34.13	NA	Likely_pathogenic
CTDC13	5	112173917	112173917	C	T	stop_gained	APC	NM_000038.5	c.2626C>T	p.Arg876*	4125	3944	181	4.39	rs121913333	Pathogenic/ Likely_pathogenic
CTDC14	5	112175273	112175273	C	T	stop_gained	APC	NM_000038.5	c.3982C>T	p.Gln1328*	2513	545	1967	78.27	rs398123121	Pathogenic
CTDC14	17	7577124	7577124	C	T	missense_variant	TP53	NM_000546.5	c.814G>A	p.Val272Met	1757	481	1276	72.62	NA	Conflicting _interpretations _of_pathogenicity
CTDC15	5	112173917	112173917	C	T	stop_gained	APC	NM_000038.5	c.2626C>T	p.Arg876*	3965	3832	133	3.35	rs121913333	Pathogenic/ Likely_pathogenic
CTDC15	17	7577519	7577527	GATGG TGAG	-	conservative_ inframe_deletion	TP53	NM_000546.5	c.754_762delCTCACCATC	p.Leu252 _Ile254del	2421	2341	79	3.26	NA	NA
CTDC16	5	112175232	112175232	G	-	frameshift_variant	APC	NM_000038.5	c.3942delG	p.Arg1314fs	2119	1914	205	9.67	NA	NA
CTDC16	17	7578442	7578442	T	C	missense_variant	TP53	NM_000546.5	c.488A>G	p.Tyr163Cys	1915	1827	88	4.6	rs148924904	Pathogenic/ Likely_pathogenic
CTDC17	5	112157650	112157650	C	A	stop_gained	APC	NM_000038.5	c.1370C>A	p.Ser457*	2218	1517	698	31.47	NA	Pathogenic
CTDC17	17	7577574	7577574	T	C	missense_variant	TP53	NM_000546.5	c.707A>G	p.Tyr236Cys	2770	2206	564	20.36	NA	Likely_pathogenic
CTDC18	5	112175358	112175358	C	A	stop_gained	APC	NM_000038.5	c.4067C>A	p.Ser1356*	1152	1068	84	7.29	NA	NA
CTDC18	17	7578263	7578263	G	A	stop_gained	TP53	NM_000546.5	c.586C>T	p.Arg196*	4855	4603	250	5.15	rs397516435	Pathogenic
CTDC19	5	112173837	112173838	AT	-	frameshift_variant	APC	NM_000038.5	c.2547_2548delTA	p.Asp849fs	1905	1789	115	6.04	NA	NA
CTDC19	5	112175339	112175339	A	T	stop_gained	APC	NM_000038.5	c.4048A>T	p.Lys1350*	833	702	131	15.73	NA	NA
CTDC19	17	7577118	7577118	C	A	missense_variant	TP53	NM_000546.5	c.820G>T	p.Val274Phe	989	900	89	9	NA	Likely_pathogenic
CTDC20	5	112175676	112175677	AG	-	frameshift_variant	APC	NM_000038.5	c.4393_4394delAG	p.Ser1465fs	1874	853	1021	54.48	rs121913334	NA
CTDC20	17	7578190	7578190	T	C	missense_variant	TP53	NM_000546.5	c.659A>G	p.Tyr220Cys	5509	1360	4148	75.29	rs121912666	Pathogenic/ Likely_pathogenic
CTDC21	5	112154723	112154723	C	T	stop_gained	APC	NM_000038.5	c.994C>T	p.Arg332*	2725	2491	234	8.59	NA	Pathogenic
CTDC21	5	112175650	112175650	-	A	frameshift_variant	APC	NM_000038.5	c.4364dupA	p.Asn1455fs	2716	2445	264	9.72	NA	NA
CTDC21	17	7577581	7577581	A	T	missense_variant	TP53	NM_000546.5	c.700T>A	p.Tyr234Asn	2749	2566	183	6.66	NA	Likely_pathogenic
CTDC22	5	112175211	112175211	-	A	frameshift_variant	APC	NM_000038.5	c.3924dupA	p.Glu1309fs	7126	3673	3452	48.44	NA	NA
CTDC22	12	25398255	25398255	G	T	missense_variant	KRAS	NM_033360.2	c.64C>A	p.Gln22Lys	7461	4153	3301	44.24	rs121913236	Likely_pathogenic
CTDC23	1	115256529	115256529	T	C	missense_variant	NRAS	NM_002524.4	c.182A>G	p.Gln61Arg	6313	6232	80	1.27	rs11554290	Pathogenic/ Likely_pathogenic
CTDC23	10	89685271	89685271	T	-	frameshift_variant	PTEN	NM_000314.4	c.170delT	p.Leu57fs	589	579	10	1.7	NA	NA
CTDC23	12	25398284	25398284	C	T	missense_variant	KRAS	NM_033360.2	c.35G>A	p.Gly12Asp	5197	5137	56	1.08	rs121913529	Pathogenic/ Likely_pathogenic
CTDC23	17	7572963	7572963	T	-	frameshift_variant	TP53	NM_000546.5	c.1146delA	p.Lys382fs	4403	4218	184	4.18	NA	NA
CTDC23	17	7577106	7577106	G	A	missense_variant	TP53	NM_000546.5	c.832C>T	p.Pro278Ser	5156	5007	148	2.87	NA	Conflicting _interpretations _of_pathogenicity
CTDC24	5	112128191	112128191	C	T	stop_gained	APC	NM_000038.5	c.694C>T	p.Arg232*	2342	2292	50	2.13	rs397515734	Pathogenic
CTDC24	17	7577094	7577094	G	A	missense_variant	TP53	NM_000546.5	c.844C>T	p.Arg282Trp	1335	1266	69	5.17	rs28934574	Conflicting _interpretations _of_pathogenicity
CTDC25	5	112164616	112164616	C	T	stop_gained	APC	NM_000038.5	c.1690C>T	p.Arg564*	8262	6669	1588	19.22	rs137854574	Pathogenic
CTDC25	5	112175255	112175255	G	T	stop_gained	APC	NM_000038.5	c.3964G>T	p.Glu1322*	2546	1463	1083	42.54	NA	NA
CTDC25	17	7577548	7577548	C	T	missense_variant	TP53	NM_000546.5	c.733G>A	p.Gly245Ser	1848	878	970	52.49	rs28934575	Pathogenic/ Likely_pathogenic
CTDC26	5	112116592	112116592	C	T	stop_gained	APC	NM_000038.5	c.637C>T	p.Arg213*	4460	4015	443	9.93	rs587781392	Pathogenic
CTDC26	5	112175407	112175407	-	C	frameshift_variant	APC	NM_000038.5	c.4118dupC	p.Glu1374fs	1707	1623	84	4.92	NA	NA
CTDC26	17	7577022	7577022	G	A	stop_gained	TP53	NM_000546.5	c.916C>T	p.Arg306*	1538	1161	377	24.51	rs121913344	Pathogenic/ Likely_pathogenic
CTDC27	5	112174099	112174099	T	-	frameshift_variant	APC	NM_000038.5	c.2810delT	p.Phe937fs	2524	2023	500	19.81	NA	NA
CTDC28	5	112175639	112175639	C	T	stop_gained	APC	NM_000038.5	c.4348C>T	p.Arg1450*	3213	3171	40	1.24	rs121913332	Pathogenic/ Likely_pathogenic
CTDC29	17	7578404	7578404	A	T	missense_variant	TP53	NM_000546.5	c.526T>A	p.Cys176Ser	2445	2383	62	2.54	NA	Conflicting _interpretations _of_pathogenicity
CTDC30	3	178936091	178936091	G	A	missense_variant	PIK3CA	NM_006218.2	c.1633G>A	p.Glu545Lys	4652	4210	440	9.46	rs104886003	Pathogenic/ Likely_pathogenic
CTDC30	5	112173590	112173590	C	T	stop_gained	APC	NM_000038.5	c.2299C>T	p.Gln767*	2829	2490	339	11.98	NA	NA
CTDC31	5	112175212	112175216	AAAAG	-	frameshift_variant	APC	NM_000038.5	c.3927_3931delAAAGA	p.Glu1309fs	6614	6499	104	1.57	rs121913224	NA
CTDC31	17	7578460	7578460	A	C	missense_variant	TP53	NM_000546.5	c.470T>G	p.Val157Gly	6880	6511	368	5.35	NA	NA
CTDC33	5	112175423	112175423	C	T	stop_gained	APC	NM_000038.5	c.4132C>T	p.Gln1378*	3300	2227	1070	32.44	rs121913329	Likely_pathogenic
CTDC33	10	89624296	89624296	G	C	missense_variant	PTEN	NM_000314.4	c.70G>C	p.Asp24His	7604	6414	1190	15.65	NA	Pathogenic
CTDC33	15	66727455	66727455	G	T	missense_variant	MAP2K1	NM_002755.3	c.171G>T	p.Lys57Asn	22992	20793	2193	9.54	NA	Pathogenic/ Likely_pathogenic
CTDC33	17	7574003	7574003	G	A	stop_gained	TP53	NM_000546.5	c.1024C>T	p.Arg342*	2438	1995	442	18.13	NA	Pathogenic
CTDC34	5	112175348	112175348	G	T	stop_gained	APC	NM_000038.5	c.4057G>T	p.Glu1353*	3489	2877	612	17.54	NA	Pathogenic
CTDC34	17	7578406	7578406	C	T	missense_variant	TP53	NM_000546.5	c.524G>A	p.Arg175His	4047	3704	342	8.45	rs28934578	Pathogenic/ Likely_pathogenic
CTDC34	17	7579432	7579432	-	G	frameshift_variant	TP53	NM_000546.5	c.254dupC	p.Ala86fs	7028	6756	263	3.74	NA	NA
CTDC35	5	112175423	112175423	C	T	stop_gained	APC	NM_000038.5	c.4132C>T	p.Gln1378*	4122	896	3224	78.21	rs121913329	Likely_pathogenic
CTDC35	17	7577085	7577085	C	T	missense_variant	TP53	NM_000546.5	c.853G>A	p.Glu285Lys	3614	1020	2594	71.78	rs112431538	Likely_pathogenic
CTDC36	5	112175162	112175162	C	T	stop_gained	APC	NM_000038.5	c.3871C>T	p.Gln1291*	2459	1756	701	28.51	NA	NA
CTDC36	17	7577539	7577539	G	A	missense_variant	TP53	NM_000546.5	c.742C>T	p.Arg248Trp	3265	2660	604	18.5	rs121912651	Pathogenic/ Likely_pathogenic
CTDC37	5	112175576	112175576	C	T	stop_gained	APC	NM_000038.5	c.4285C>T	p.Gln1429*	3428	2510	918	26.78	rs74535574	Likely_pathogenic
CTDC37	17	7572927	7572927	T	C	stop_lost	TP53	NM_000546.5	c.1182A>G	p.Ter394Trp	2325	1692	633	27.23	NA	NA
CTDC37	17	37879588	37879588	A	G	missense_variant	ERBB2	NM_004448.2	c.1963A>G	p.Ile655Val	2637	2548	89	3.38	rs1136201	Benign
CTDC37	17	37884037	37884037	C	G	missense_variant	ERBB2	NM_004448.2	c.3508C>G	p.Pro1170Ala	2444	2364	80	3.27	rs1058808	not_provided
CTDC38	5	112175255	112175255	G	T	stop_gained	APC	NM_000038.5	c.3964G>T	p.Glu1322*	2142	578	1561	72.88	NA	NA
CTDC38	17	7578212	7578212	G	A	stop_gained	TP53	NM_000546.5	c.637C>T	p.Arg213*	2396	774	1616	67.56	rs397516436	Pathogenic
CTDC39	5	112154723	112154723	C	T	stop_gained	APC	NM_000038.5	c.994C>T	p.Arg332*	3460	2071	1389	40.14	NA	Pathogenic
CTDC39	5	112175951	112175951	-	A	frameshift_variant	APC	NM_000038.5	c.4666dupA	p.Thr1556fs	1995	1198	797	39.95	NA	NA
CTDC40	5	112170777	112170777	-	AGAC ATA	frameshift_variant & stop_gained	APC	NM_000038.5	c.1878_1879insTAAGACA	p.Asn627fs	1952	1626	317	16.24	NA	NA
CTDC40	17	7574003	7574003	G	-	frameshift_variant	TP53	NM_000546.5	c.1024delC	p.Arg342fs	2250	1784	466	20.71	NA	NA
CTDC41	17	37879588	37879588	A	G	missense_variant	ERBB2	NM_004448.2	c.1963A>G	p.Ile655Val	1272	1243	29	2.28	rs1136201	Benign
CTDC42	5	112174466	112174466	G	T	stop_gained	APC	NM_000038.5	c.3175G>T	p.Glu1059*	1371	1350	21	1.53	NA	NA
CTDC43	5	112175426	112175426	G	T	stop_gained	APC	NM_000038.5	c.4135G>T	p.Glu1379*	8072	6983	1085	13.44	rs121913326	Likely_pathogenic
CTDC44	5	112151261	112151261	C	T	stop_gained	APC	NM_000038.5	c.904C>T	p.Arg302*	7640	5748	1888	24.71	rs137854568	Pathogenic
CTDC44	5	112175639	112175639	C	T	stop_gained	APC	NM_000038.5	c.4348C>T	p.Arg1450*	4682	4089	593	12.67	rs121913332	Pathogenic/ Likely_pathogenic
CTDC44	17	7577022	7577022	G	A	stop_gained	TP53	NM_000546.5	c.916C>T	p.Arg306*	2546	1668	877	34.45	rs121913344	Pathogenic/ Likely_pathogenic
CTDC45	5	112128143	112128143	C	T	stop_gained & splice_region_variant	APC	NM_000038.5	c.646C>T	p.Arg216*	7386	5208	2173	29.42	rs62619935	Pathogenic
CTDC45	5	112151251	112151252	CT	-	frameshift_variant	APC	NM_000038.5	c.896_897delCT	p.Ser299fs	18040	13556	4480	24.83	rs397515735	NA
CTDC45	17	7577022	7577022	G	A	stop_gained	TP53	NM_000546.5	c.916C>T	p.Arg306*	7360	2860	4497	61.1	rs121913344	Pathogenic/ Likely_pathogenic
CTDC46	5	112157627	112157628	TG	-	frameshift_variant	APC	NM_000038.5	c.1354_1355delGT	p.Val452fs	3416	2915	501	14.67	NA	NA
CTDC46	5	112157650	112157650	C	A	stop_gained	APC	NM_000038.5	c.1370C>A	p.Ser457*	3643	2533	1110	30.47	NA	Pathogenic
CTDC46	5	112175480	112175480	G	T	stop_gained	APC	NM_000038.5	c.4189G>T	p.Glu1397*	2253	1738	514	22.81	NA	NA
CTDC46	17	7577120	7577120	C	T	missense_variant	TP53	NM_000546.5	c.818G>A	p.Arg273His	2300	1125	1175	51.09	rs28934576	Pathogenic/ Likely_pathogenic
CTDC47	5	112174631	112174631	C	T	stop_gained	APC	NM_000038.5	c.3340C>T	p.Arg1114*	6318	3602	2715	42.97	rs121913331	Pathogenic/ Likely_pathogenic
CTDC49	5	112173947	112173947	C	T	stop_gained	APC	NM_000038.5	c.2656C>T	p.Gln886*	6907	6804	102	1.48	NA	Pathogenic
CTDC49	12	25398281	25398281	C	T	missense_variant	KRAS	NM_033360.2	c.38G>A	p.Gly13Asp	4512	4418	93	2.06	rs112445441	Pathogenic/ Likely_pathogenic
CTDC49	17	7578406	7578406	C	T	missense_variant	TP53	NM_000546.5	c.524G>A	p.Arg175His	6831	6621	201	2.94	rs28934578	Pathogenic/ Likely_pathogenic
CTDC50	5	112175639	112175639	C	T	stop_gained	APC	NM_000038.5	c.4348C>T	p.Arg1450*	2046	1877	165	8.06	rs121913332	Pathogenic/ Likely_pathogenic
CTDC50	17	7578406	7578406	C	T	missense_variant	TP53	NM_000546.5	c.524G>A	p.Arg175His	4250	3634	614	14.45	rs28934578	Pathogenic/ Likely_pathogenic
CTDC51	5	112128164	112128164	C	T	stop_gained	APC	NM_000038.5	c.667C>T	p.Gln223*	3614	2280	1333	36.88	NA	Pathogenic
CTDC51	5	112173299	112173299	A	T	stop_gained	APC	NM_000038.5	c.2008A>T	p.Lys670*	3029	1893	1135	37.47	NA	NA
CTDC52	5	112175358	112175358	C	A	stop_gained	APC	NM_000038.5	c.4067C>A	p.Ser1356*	653	602	51	7.81	NA	NA
CTDC52	5	112177122	112177122	G	T	missense_variant	APC	NM_000038.5	c.5831G>T	p.Gly1944Val	793	776	17	2.14	NA	NA
CTDC52	5	149499583	149499583	A	T	missense_variant	PDGFRB	NM_002609.3	c.2690T>A	p.Phe897Tyr	7123	6968	153	2.15	NA	NA
CTDC52	7	55229255	55229255	G	A	missense_variant	EGFR	NM_005228.3	c.1562G>A	p.Arg521Lys	2267	2207	60	2.65	rs2227983	Benign/ Likely_benign
CTDC52	17	7577081	7577081	T	C	missense_variant	TP53	NM_000546.5	c.857A>G	p.Glu286Gly	1149	1090	59	5.13	NA	Conflicting _interpretations _of_pathogenicity
CTDC52	17	7577551	7577551	C	A	missense_variant	TP53	NM_000546.5	c.730G>T	p.Gly244Cys	1576	1520	56	3.55	NA	Conflicting _interpretations _of_pathogenicity
CTDC52	17	37864615	37864615	C	-	frameshift_variant	ERBB2	NM_004448.2	c.268delC	p.Gln90fs	1846	1804	40	2.17	NA	NA
CTDC53	17	7577068	7577069	GC	-	frameshift_variant	TP53	NM_000546.5	c.869_870delGC	p.Arg290fs	3785	2933	852	22.51	NA	NA
CTDC54	5	112174929	112174929	C	G	stop_gained	APC	NM_000038.5	c.3638C>G	p.Ser1213*	5692	5244	448	7.87	NA	NA
CTDC54	5	112175426	112175426	G	T	stop_gained	APC	NM_000038.5	c.4135G>T	p.Glu1379*	3402	3335	67	1.97	rs121913326	Likely_pathogenic
CTDC54	17	7577020	7577020	-	C	frameshift_variant & splice_region_variant	TP53	NM_000546.5	c.917dupG	p.Ala307fs	3553	3290	263	7.4	NA	NA
CTDC56	5	112174241	112174241	G	T	stop_gained	APC	NM_000038.5	c.2950G>T	p.Glu984*	1948	418	1529	78.49	NA	Pathogenic
CTDC56	7	140477826	140477826	C	A	missense_variant	BRAF	XM_005250045.1	c.1482G>T	p.Gln494His	3714	2685	1029	27.71	NA	NA
CTDC56	17	7577509	7577509	C	T	missense_variant	TP53	NM_000546.5	c.772G>A	p.Glu258Lys	1932	516	1416	73.29	rs121912652	Conflicting _interpretations _of_pathogenicity
CTDC58	5	112162943	112162945	AGG	-	frameshift_variant & splice_donor_variant & splice_region_variant & intron_variant	APC	NM_000038.5	c.1547_1548+1delAGG	p.Lys516fs	1026	1005	21	2.05	NA	NA
CTDC58	5	112175303	112175303	C	T	stop_gained	APC	NM_000038.5	c.4012C>T	p.Gln1338*	1193	1146	47	3.94	rs121913327	Pathogenic/ Likely_pathogenic
CTDC58	17	7577022	7577022	G	A	stop_gained	TP53	NM_000546.5	c.916C>T	p.Arg306*	1260	1193	66	5.24	rs121913344	Pathogenic/ Likely_pathogenic
CTDC59	5	112175558	112175558	C	-	frameshift_variant	APC	NM_000038.5	c.4267delC	p.Leu1423fs	2034	1423	611	30.04	NA	NA
CTDC59	17	7577022	7577022	G	A	stop_gained	TP53	NM_000546.5	c.916C>T	p.Arg306*	1852	648	1204	65.01	rs121913344	Pathogenic/ Likely_pathogenic
CTDC60	5	112162891	112162891	C	T	stop_gained	APC	NM_000038.5	c.1495C>T	p.Arg499*	3633	2127	1506	41.45	rs137854580	Pathogenic
CTDC60	17	7577550	7577550	C	T	missense_variant	TP53	NM_000546.5	c.731G>A	p.Gly244Asp	3245	1333	1912	58.92	NA	Likely_pathogenic
CTDC61	5	112175707	112175707	A	-	frameshift_variant	APC	NM_000038.5	c.4418delA	p.Asn1473fs	2140	1930	210	9.81	NA	NA
CTDC61	17	7577094	7577094	G	A	missense_variant	TP53	NM_000546.5	c.844C>T	p.Arg282Trp	3210	2987	222	6.92	rs28934574	Conflicting _interpretations _of_pathogenicity
CTDC62	5	112151261	112151261	C	T	stop_gained	APC	NM_000038.5	c.904C>T	p.Arg302*	8976	8625	347	3.87	rs137854568	Pathogenic
CTDC62	5	112173944	112173944	G	A	missense_variant	APC	NM_000038.5	c.2653G>A	p.Ala885Thr	6141	5899	241	3.92	NA	Uncertain_significance
CTDC62	5	112175251	112175252	GA	-	frameshift_variant	APC	NM_000038.5	c.3961_3962delAG	p.Ser1321fs	5177	4929	245	4.73	NA	NA
CTDC62	17	7578530	7578530	A	G	missense_variant	TP53	NM_000546.5	c.400T>C	p.Phe134Leu	9544	9077	466	4.88	rs267605077	NA
CTDC62	17	37884037	37884037	C	G	missense_variant	ERBB2	NM_004448.2	c.3508C>G	p.Pro1170Ala	6831	4161	2667	39.04	rs1058808	not_provided
CTDC63	5	112174179	112174179	-	T	frameshift_variant	APC	NM_000038.5	c.2891dupT	p.Leu964fs	2560	2363	197	7.7	NA	NA
CTDC63	17	7578479	7578479	G	A	missense_variant	TP53	NM_000546.5	c.451C>T	p.Pro151Ser	5020	4760	259	5.16	rs28934874	Pathogenic/ Likely_pathogenic
CTDC64	5	112136985	112136985	C	T	stop_gained	APC	NM_000038.5	c.739C>T	p.Gln247*	4760	1782	2975	62.51	NA	NA
CTDC64	17	7577022	7577022	G	A	stop_gained	TP53	NM_000546.5	c.916C>T	p.Arg306*	2562	1018	1539	60.07	rs121913344	Pathogenic/ Likely_pathogenic
CTDC65	5	112128143	112128143	C	T	stop_gained & splice_region_variant	APC	NM_000038.5	c.646C>T	p.Arg216*	1455	294	1161	79.79	rs62619935	Pathogenic
CTDC65	17	7578236	7578236	A	G	missense_variant	TP53	NM_000546.5	c.613T>C	p.Tyr205His	2378	518	1860	78.22	NA	Likely_pathogenic
CTDC66	5	112173917	112173917	C	T	stop_gained	APC	NM_000038.5	c.2626C>T	p.Arg876*	4879	2651	2220	45.5	rs121913333	Pathogenic/ Likely_pathogenic
CTDC66	10	89717644	89717644	-	AT	frameshift_variant	PTEN	NM_000314.4	c.674_675dupAT	p.Ser226fs	8913	4362	4488	50.35	NA	NA
CTDC66	17	7577094	7577094	G	A	missense_variant	TP53	NM_000546.5	c.844C>T	p.Arg282Trp	3223	967	2255	69.97	rs28934574	Conflicting _interpretations _of_pathogenicity
CTDC67	3	178936091	178936091	G	A	missense_variant	PIK3CA	NM_006218.2	c.1633G>A	p.Glu545Lys	3467	2157	1310	37.78	rs104886003	Pathogenic/ Likely_pathogenic
CTDC67	5	112155002	112155002	G	T	stop_gained	APC	NM_000038.5	c.1273G>T	p.Glu425*	6255	4086	2164	34.6	NA	NA
CTDC67	5	112175446	112175456	CAGATG TACTT	-	frameshift_variant	APC	NM_000038.5	c.4156_4166delAGATGTACTTC	p.Arg1386fs	2493	1733	760	30.49	NA	NA
CTDC67	17	7577095	7577095	G	T	missense_variant	TP53	NM_000546.5	c.843C>A	p.Asp281Glu	2008	647	1359	67.68	NA	Uncertain_significance
CTDC69	5	112151261	112151261	C	T	stop_gained	APC	NM_000038.5	c.904C>T	p.Arg302*	5002	4696	305	6.1	rs137854568	Pathogenic
CTDC69	5	112175423	112175423	C	T	stop_gained	APC	NM_000038.5	c.4132C>T	p.Gln1378*	2295	2175	120	5.23	rs121913329	Likely_pathogenic
CTDC70	5	112137036	112137036	C	T	stop_gained	APC	NM_000038.5	c.790C>T	p.Gln264*	6283	5586	696	11.08	NA	NA
CTDC70	5	112175246	112175246	C	-	frameshift_variant	APC	NM_000038.5	c.3956delC	p.Pro1319fs	3100	2642	458	14.77	NA	NA
CTDC70	17	7577105	7577105	G	A	missense_variant	TP53	NM_000546.5	c.833C>T	p.Pro278Leu	3650	2461	1189	32.58	NA	Pathogenic/ Likely_pathogenic
CTDC71	17	7579316	7579321	CAAGTC	-	disruptive_ inframe_deletion	TP53	NM_000546.5	c.366_371delGACTTG	p.Thr123 _Cys124del	3751	3710	38	1.01	NA	NA
CTDC72	12	56488225	56488225	G	A	missense_variant	ERBB3	NM_001982.3	c.1744G>A	p.Gly582Arg	5072	4822	250	4.93	NA	NA
CTDC72	17	7577141	7577141	C	T	missense_variant	TP53	NM_000546.5	c.797G>A	p.Gly266Glu	3260	3184	75	2.3	rs193920774	Conflicting _interpretations _of_pathogenicity
CTDC72	17	37879658	37879658	G	A	missense_variant	ERBB2	NM_004448.2	c.2033G>A	p.Arg678Gln	3677	3563	110	2.99	NA	Likely_pathogenic
CTDC73	5	112128143	112128143	C	T	stop_gained & splice_region_variant	APC	NM_000038.5	c.646C>T	p.Arg216*	3097	2901	190	6.13	rs62619935	Pathogenic
CTDC73	17	7577120	7577120	C	T	missense_variant	TP53	NM_000546.5	c.818G>A	p.Arg273His	3897	3736	158	4.05	rs28934576	Pathogenic/ Likely_pathogenic
CTDC74	5	112175162	112175162	C	T	stop_gained	APC	NM_000038.5	c.3871C>T	p.Gln1291*	1620	1408	211	13.02	NA	NA
CTDC75	5	112175235	112175235	C	A	stop_gained	APC	NM_000038.5	c.3944C>A	p.Ser1315*	2337	1156	1181	50.53	NA	NA
CTDC75	12	56494894	56494894	T	G	missense_variant	ERBB3	NM_001982.3	c.3251T>G	p.Leu1084Arg	3324	2787	535	16.1	NA	NA
CTDC75	17	7578199	7578199	A	C	missense_variant	TP53	NM_000546.5	c.650T>G	p.Val217Gly	2357	767	1588	67.43	NA	NA
CTDC76	12	25378571	25378571	C	T	missense_variant	KRAS	NM_033360.2	c.427G>A	p.Glu143Lys	774	759	15	1.94	NA	NA
CTDC78	5	112128191	112128191	C	T	stop_gained	APC	NM_000038.5	c.694C>T	p.Arg232*	3093	1967	1125	36.37	rs397515734	Pathogenic
CTDC78	5	112175490	112175490	C	A	stop_gained	APC	NM_000038.5	c.4199C>A	p.Ser1400*	1886	1203	678	35.95	NA	NA
CTDC79	10	89692905	89692905	G	A	missense_variant	PTEN	NM_000314.4	c.389G>A	p.Arg130Gln	25343	25054	268	1.06	rs121909229	Pathogenic/ Likely_pathogenic
CTDC81	5	112116592	112116592	C	T	stop_gained	APC	NM_000038.5	c.637C>T	p.Arg213*	4102	3629	465	11.34	rs587781392	Pathogenic
CTDC81	17	7577539	7577539	G	A	missense_variant	TP53	NM_000546.5	c.742C>T	p.Arg248Trp	5435	3827	1607	29.57	rs121912651	Pathogenic/ Likely_pathogenic
CTDC81	17	37855834	37855834	C	A	missense_variant	ERBB2	XM_005257139.1	c.22C>A	p.Pro8Thr	5763	5295	463	8.03	rs4252596	not_provided
CTDC81	17	37879588	37879588	A	G	missense_variant	ERBB2	NM_004448.2	c.1963A>G	p.Ile655Val	3071	2403	664	21.62	rs1136201	Benign
CTDC81	17	37884037	37884037	C	G	missense_variant	ERBB2	NM_004448.2	c.3508C>G	p.Pro1170Ala	7346	5424	1921	26.15	rs1058808	not_provided
CTDC82	5	112162891	112162891	C	T	stop_gained	APC	NM_000038.5	c.1495C>T	p.Arg499*	3974	2930	1041	26.2	rs137854580	Pathogenic
CTDC82	5	112175770	112175770	G	-	frameshift_variant	APC	NM_000038.5	c.4480delG	p.Glu1494fs	2788	2180	598	21.45	NA	NA
CTDC82	5	112179788	112179788	C	T	missense_variant	APC	NM_000038.5	c.8497C>T	p.Arg2833Cys	3372	2608	759	22.51	NA	NA
CTDC82	17	7574003	7574003	G	A	stop_gained	TP53	NM_000546.5	c.1024C>T	p.Arg342*	4039	2921	1114	27.58	NA	Pathogenic
CTDC82	17	7578263	7578263	G	A	stop_gained	TP53	NM_000546.5	c.586C>T	p.Arg196*	3719	2707	1008	27.1	rs397516435	Pathogenic
CTDC83	5	112174282	112174282	T	A	stop_gained	APC	NM_000038.5	c.2991T>A	p.Tyr997*	2637	2097	540	20.48	NA	NA
CTDC83	17	7577074	7577074	-	T	frameshift_variant	TP53	NM_000546.5	c.863dupA	p.Asn288fs	3369	2130	1238	36.75	NA	NA
CTDC84	5	112128143	112128143	C	T	stop_gained & splice_region_variant	APC	NM_000038.5	c.646C>T	p.Arg216*	3400	2763	630	18.53	rs62619935	Pathogenic
CTDC84	5	112175284	112175288	AACCA	-	frameshift_variant	APC	NM_000038.5	c.3995_3999delCCAAA	p.Thr1332fs	3674	3133	541	14.73	NA	NA
CTDC84	7	116371798	116371798	G	A	missense_variant	MET	XM_005250353.1	c.1334G>A	p.Arg445His	15802	10501	5294	33.5	NA	NA
CTDC84	17	7577548	7577548	C	T	missense_variant	TP53	NM_000546.5	c.733G>A	p.Gly245Ser	4903	3120	1778	36.26	rs28934575	Pathogenic/ Likely_pathogenic
CTDC85	5	112173899	112173899	C	T	missense_variant	APC	NM_000038.5	c.2608C>T	p.Pro870Ser	1190	1162	28	2.35	rs33974176	Benign/ Likely_benign
CTDC85	5	112175303	112175303	C	T	stop_gained	APC	NM_000038.5	c.4012C>T	p.Gln1338*	1057	1034	23	2.18	rs121913327	Pathogenic/ Likely_pathogenic
CTDC85	12	25380179	25380179	A	C	missense_variant	KRAS	NM_033360.2	c.279T>G	p.Ile93Met	1135	1102	32	2.82	NA	NA
CTDC85	12	25398284	25398284	C	T	missense_variant	KRAS	NM_033360.2	c.35G>A	p.Gly12Asp	1335	1317	18	1.35	rs121913529	Pathogenic/ Likely_pathogenic
CTDC85	17	37872035	37872035	G	T	missense_variant	ERBB2	NM_004448.2	c.1356G>T	p.Trp452Cys	812	789	23	2.83	rs4252633	not_provided
CTDC85	17	37879585	37879585	A	G	missense_variant	ERBB2	NM_004448.2	c.1960A>G	p.Ile654Val	356	344	11	3.09	rs1801201	Benign
CTDC86	5	112116592	112116592	C	T	stop_gained	APC	NM_000038.5	c.637C>T	p.Arg213*	3101	2338	759	24.48	rs587781392	Pathogenic
CTDC86	5	112175207	112175207	G	T	stop_gained	APC	NM_000038.5	c.3916G>T	p.Glu1306*	3219	1973	1242	38.58	rs121913462	Likely_pathogenic
CTDC86	17	7577094	7577094	G	A	missense_variant	TP53	NM_000546.5	c.844C>T	p.Arg282Trp	3241	1203	2038	62.88	rs28934574	Conflicting _interpretations _of_pathogenicity
CTDC87	7	140453136	140453136	A	T	missense_variant	BRAF	XM_005250045.1	c.1799T>A	p.Val600Glu	4241	3616	625	14.74	rs113488022	Pathogenic/ Likely_pathogenic
CTDC87	17	7577539	7577539	G	A	missense_variant	TP53	NM_000546.5	c.742C>T	p.Arg248Trp	3625	3139	484	13.35	rs121912651	Pathogenic/ Likely_pathogenic
CTDC88	1	115256427	115256427	A	G	missense_variant	NRAS	NM_002524.4	c.284T>C	p.Leu95Pro	4857	2780	2077	42.76	NA	NA
CTDC88	3	178941913	178941913	C	A	missense_variant	PIK3CA	NM_006218.2	c.2232C>A	p.Phe744Leu	6207	3572	2634	42.44	NA	NA
CTDC88	5	112154772	112154772	G	A	missense_variant	APC	NM_000038.5	c.1043G>A	p.Arg348Gln	7855	4409	3442	43.82	NA	Uncertain_significance
CTDC88	5	112170822	112170822	C	T	missense_variant	APC	NM_000038.5	c.1918C>T	p.Arg640Trp	4042	2301	1739	43.02	NA	Uncertain_significance
CTDC88	5	112173447	112173447	C	A	missense_variant	APC	NM_000038.5	c.2156C>A	p.Ala719Asp	5483	4379	1102	20.1	NA	NA
CTDC88	5	112174384	112174384	T	G	stop_gained	APC	NM_000038.5	c.3093T>G	p.Tyr1031*	2688	1482	1203	44.75	NA	NA
CTDC88	5	112175182	112175182	T	G	missense_variant	APC	NM_000038.5	c.3891T>G	p.Asp1297Glu	4091	3988	103	2.52	NA	NA
CTDC88	5	112175639	112175639	C	T	stop_gained	APC	NM_000038.5	c.4348C>T	p.Arg1450*	3434	2020	1413	41.15	rs121913332	Pathogenic/ Likely_pathogenic
CTDC88	5	112178562	112178562	C	A	stop_gained	APC	NM_000038.5	c.7271C>A	p.Ser2424*	5061	2903	2155	42.58	NA	NA
CTDC88	5	112178688	112178688	C	T	missense_variant	APC	NM_000038.5	c.7397C>T	p.Ser2466Phe	4947	2868	2075	41.98	NA	NA
CTDC88	5	112179011	112179011	C	T	missense_variant	APC	NM_000038.5	c.7720C>T	p.Leu2574Phe	3625	1975	1650	45.52	NA	NA
CTDC88	5	149500492	149500492	G	A	stop_gained	PDGFRB	NM_002609.3	c.2545C>T	p.Arg849*	22557	12460	10083	44.7	NA	NA
CTDC88	7	116371771	116371771	G	A	missense_variant	MET	XM_005250353.1	c.1307G>A	p.Arg436Gln	17447	9414	8029	46.02	NA	NA
CTDC88	7	116423422	116423422	G	T	stop_gained	MET	XM_005250353.1	c.3808G>T	p.Glu1270*	17719	13844	3871	21.85	NA	NA
CTDC88	10	89624245	89624245	G	T	stop_gained	PTEN	NM_000314.4	c.19G>T	p.Glu7*	12854	7349	5493	42.73	NA	Likely_pathogenic
CTDC88	10	89685287	89685287	A	T	missense_variant	PTEN	NM_000314.4	c.182A>T	p.His61Leu	166	133	33	19.88	rs398123316	NA
CTDC88	17	7577094	7577094	G	A	missense_variant	TP53	NM_000546.5	c.844C>T	p.Arg282Trp	6164	3495	2668	43.28	rs28934574	Conflicting _interpretations _of_pathogenicity
CTDC88	17	7578212	7578212	G	A	stop_gained	TP53	NM_000546.5	c.637C>T	p.Arg213*	5467	2939	2519	46.13	rs397516436	Pathogenic
CTDC89	3	178936095	178936095	A	G	missense_variant	PIK3CA	NM_006218.2	c.1637A>G	p.Gln546Arg	4129	4063	64	1.55	rs397517201	Pathogenic/ Likely_pathogenic
CTDC89	5	112176555	112176555	C	T	missense_variant	APC	NM_000038.5	c.5264C>T	p.Ala1755Val	1938	1904	30	1.55	NA	Conflicting _interpretations _of_pathogenicity
CTDC89	7	116340262	116340262	A	G	missense_variant	MET	XM_005250353.1	c.1181A>G	p.Asn394Ser	11927	9920	2007	16.83	rs33917957	Benign
CTDC89	17	37879588	37879588	A	G	missense_variant	ERBB2	NM_004448.2	c.1963A>G	p.Ile655Val	1171	937	232	19.81	rs1136201	Benign
CTDC90	5	112175472	112175473	AT	-	frameshift_variant	APC	NM_000038.5	c.4182_4183delTA	p.Asp1394fs	2177	2148	29	1.33	NA	NA
CTDC90	17	7577557	7577557	A	T	missense_variant	TP53	NM_000546.5	c.724T>A	p.Cys242Ser	3847	3764	80	2.08	NA	Likely_pathogenic
CTDC91	3	178917478	178917478	G	A	missense_variant & splice_region_variant	PIK3CA	NM_006218.2	c.353G>A	p.Gly118Asp	2736	1343	1387	50.69	NA	Pathogenic/ Likely_pathogenic
CTDC91	5	112174745	112174745	C	T	stop_gained	APC	NM_000038.5	c.3454C>T	p.Gln1152*	3677	2890	787	21.4	NA	Pathogenic
CTDC91	5	112175951	112175951	-	A	frameshift_variant	APC	NM_000038.5	c.4666dupA	p.Thr1556fs	2482	2093	386	15.55	NA	NA
CTDC91	5	149510156	149510156	C	A	missense_variant	PDGFRB	NM_002609.3	c.1313G>T	p.Gly438Val	10927	9020	1905	17.43	NA	NA
CTDC91	17	7577121	7577121	G	A	missense_variant	TP53	NM_000546.5	c.817C>T	p.Arg273Cys	4197	1584	2610	62.19	rs121913343	Conflicting _interpretations _of_pathogenicity
CTDC92	5	112173917	112173917	C	T	stop_gained	APC	NM_000038.5	c.2626C>T	p.Arg876*	2581	489	2090	80.98	rs121913333	Pathogenic/ Likely_pathogenic
CTDC93	3	178952085	178952085	A	G	missense_variant	PIK3CA	NM_006218.2	c.3140A>G	p.His1047Arg	3643	3566	72	1.98	rs121913279	Pathogenic/ Likely_pathogenic
CTDC93	5	112116592	112116592	C	T	stop_gained	APC	NM_000038.5	c.637C>T	p.Arg213*	1955	1749	203	10.38	rs587781392	Pathogenic
CTDC93	5	112173858	112173858	G	A	missense_variant	APC	NM_000038.5	c.2567G>A	p.Arg856His	2134	1935	198	9.28	NA	NA
CTDC93	5	112174916	112174916	G	T	stop_gained	APC	NM_000038.5	c.3625G>T	p.Glu1209*	3311	3253	57	1.72	NA	NA
CTDC93	12	25398284	25398284	C	T	missense_variant	KRAS	NM_033360.2	c.35G>A	p.Gly12Asp	1846	1669	175	9.48	rs121913529	Pathogenic/ Likely_pathogenic
CTDC93	17	7578406	7578406	C	T	missense_variant	TP53	NM_000546.5	c.524G>A	p.Arg175His	3740	3566	170	4.55	rs28934578	Pathogenic/ Likely_pathogenic
