# Supplementary material for: Circulating tumor DNA sequencing in colorectal cancer patients treated with first-line chemotherapy with anti-EGFR
Source: Sci Rep. 2021 Aug 11;11:16333. doi: 10.1038/s41598-021-95345-4 (PMC8358023; doi:10.1038/s41598-021-95345-4)
Supplement: Supplementary file 5 — Supplementary Table 4. [file 41598_2021_95345_MOESM5_ESM.xlsx]

## Sheet: Suppl. Table 4
1) 137 mutations in tissue
ID	Chr	Pos_start	Pos_end	Ref	Alt	Mutation type	Gene	Transcript	Base change	AA change	Baseline cfDNA				Tissue
											Total reads	Ref. reads	Var. reads	VAF(%)	Total reads	Ref. reads	Var. reads	VAF(%)
CTDC02	12	25398284	25398284	C	A	missense_variant	KRAS	NM_033360.2	c.35G>T	p.Gly12Val	2536	2528	5	0.197161	634	557	77	12.15
CTDC02	17	7578403	7578403	C	T	missense_variant	TP53	NM_000546.5	c.527G>A	p.Cys176Tyr	3412	3399	12	0.3517	405	317	88	21.73
CTDC03	5	112175939	112175939	G	T	stop_gained	APC	NM_000038.5	c.4648G>T	p.Glu1550*	3704	3698	3	0.0809935	360	318	42	11.67
CTDC03	7	140500178	140500178	C	T	missense_variant	BRAF	XM_005250045.1	c.964G>A	p.Ala322Thr	3434	3422	1	0.0291206	110	98	12	10.91
CTDC03	17	7577142	7577142	C	T	missense_variant	TP53	NM_000546.5	c.796G>A	p.Gly266Arg	1663	1661	1	0.0601323	275	220	55	20
CTDC04	5	112090592	112090592	C	T	missense_variant	APC	NM_000038.5	c.5C>T	p.Ala2Val	2584	2465	118	4.57	1000	699	301	30.1
CTDC04	5	112151261	112151261	C	T	stop_gained	APC	NM_000038.5	c.904C>T	p.Arg302*	6984	6697	286	4.1	1470	1079	387	26.33
CTDC04	5	112175891	112175891	G	-	frameshift_variant	APC	NM_000038.5	c.4602delG	p.Asn1535fs	3144	3035	109	3.47	1109	780	329	29.67
CTDC04	5	112176660	112176660	-	A	frameshift_variant	APC	NM_000038.5	c.5375dupA	p.Asn1792fs	1287	1256	21	1.63	896	799	95	10.6
CTDC04	17	7578212	7578212	G	A	stop_gained	TP53	NM_000546.5	c.637C>T	p.Arg213*	4779	4554	217	4.54	787	476	311	39.52
CTDC05	5	112175760	112175787	ATTTTGCC ACGGAAAG TACTCCAG ATGG	-	frameshift_variant	APC	NM_000038.5	c.4474_4501delGCCACGGAAAGTACTCCAGATGGATTTT	p.Ala1492fs	2840	2806	32	1.13	348	190	158	45.4
CTDC05	17	7577056	7577056	-	T	frameshift_variant	TP53	NM_000546.5	c.881dupA	p.Pro295fs	2469	2390	77	3.12	647	166	481	74.34
CTDC05	17	37881000	37881000	G	T	missense_variant	ERBB2	NM_004448.2	c.2329G>T	p.Val777Leu	3135	2285	850	27.11	13365	664	12698	95.01
CTDC06	5	112175171	112175171	C	T	stop_gained	APC	NM_000038.5	c.3880C>T	p.Gln1294*	2865	2364	501	17.49	609	368	241	39.57
CTDC06	17	7577532	7577532	G	A	missense_variant	TP53	NM_000546.5	c.749C>T	p.Pro250Leu	2843	2495	348	12.24	870	580	290	33.33
CTDC06	17	7578475	7578475	G	A	missense_variant	TP53	NM_000546.5	c.455C>T	p.Pro152Leu	2645	2484	161	6.09	838	704	134	15.99
CTDC11	17	7577574	7577574	T	C	missense_variant	TP53	NM_000546.5	c.707A>G	p.Tyr236Cys	3769	2877	891	23.64	151	108	43	28.48
CTDC11	17	7577120	7577120	C	T	missense_variant	TP53	NM_000546.5	c.818G>A	p.Arg273His	4004	2269	1735	43.33	165	102	63	38.18
CTDC13	5	112173917	112173917	C	T	stop_gained	APC	NM_000038.5	c.2626C>T	p.Arg876*	4125	3944	181	4.39	1242	939	303	24.4
CTDC14	5	112175273	112175273	C	T	stop_gained	APC	NM_000038.5	c.3982C>T	p.Gln1328*	2513	545	1967	78.27	1464	1072	392	26.78
CTDC14	17	7577124	7577124	C	T	missense_variant	TP53	NM_000546.5	c.814G>A	p.Val272Met	1757	481	1276	72.62	1084	823	261	24.08
CTDC15	5	112173917	112173917	C	T	stop_gained	APC	NM_000038.5	c.2626C>T	p.Arg876*	3965	3832	133	3.35	1557	1219	336	21.58
CTDC15	17	7577519	7577527	GATGG TGAG	-	conservative_inframe_deletion	TP53	NM_000546.5	c.754_762delCTCACCATC	p.Leu252_Ile254del	2421	2341	79	3.26	947	765	182	19.22
CTDC16	5	112175232	112175232	G	-	frameshift_variant	APC	NM_000038.5	c.3942delG	p.Arg1314fs	2119	1914	205	9.67	1413	1052	359	25.41
CTDC16	17	7578442	7578442	T	C	missense_variant	TP53	NM_000546.5	c.488A>G	p.Tyr163Cys	1915	1827	88	4.6	2169	1781	388	17.89
CTDC17	5	112157650	112157650	C	A	stop_gained	APC	NM_000038.5	c.1370C>A	p.Ser457*	2218	1517	698	31.47	640	434	206	32.19
CTDC17	17	7577574	7577574	T	C	missense_variant	TP53	NM_000546.5	c.707A>G	p.Tyr236Cys	2770	2206	564	20.36	572	394	178	31.12
CTDC18	5	112175358	112175358	C	A	stop_gained	APC	NM_000038.5	c.4067C>A	p.Ser1356*	1152	1068	84	7.29	703	430	273	38.83
CTDC18	17	7578263	7578263	G	A	stop_gained	TP53	NM_000546.5	c.586C>T	p.Arg196*	4855	4603	250	5.15	982	607	375	38.19
CTDC19	5	112175339	112175339	A	T	stop_gained	APC	NM_000038.5	c.4048A>T	p.Lys1350*	833	702	131	15.73	714	589	125	17.51
CTDC19	17	7577118	7577118	C	A	missense_variant	TP53	NM_000546.5	c.820G>T	p.Val274Phe	989	900	89	9	704	577	127	18.04
CTDC20	17	7578190	7578190	T	C	missense_variant	TP53	NM_000546.5	c.659A>G	p.Tyr220Cys	5509	1360	4148	75.29	550	448	102	18.55
CTDC21	5	112154723	112154723	C	T	stop_gained	APC	NM_000038.5	c.994C>T	p.Arg332*	2725	2491	234	8.59	777	522	253	32.56
CTDC21	5	112175650	112175650	-	A	frameshift_variant	APC	NM_000038.5	c.4364dupA	p.Asn1455fs	2716	2445	264	9.72	1299	898	401	30.87
CTDC21	17	7577581	7577581	A	T	missense_variant	TP53	NM_000546.5	c.700T>A	p.Tyr234Asn	2749	2566	183	6.66	927	688	239	25.78
CTDC24	5	112128191	112128191	C	T	stop_gained	APC	NM_000038.5	c.694C>T	p.Arg232*	2342	2292	50	2.13	1239	1022	217	17.51
CTDC24	17	7577094	7577094	G	A	missense_variant	TP53	NM_000546.5	c.844C>T	p.Arg282Trp	1335	1266	69	5.17	970	576	394	40.62
CTDC25	17	7577548	7577548	C	T	missense_variant	TP53	NM_000546.5	c.733G>A	p.Gly245Ser	1848	878	970	52.49	1029	889	140	13.61
CTDC26	5	112116592	112116592	C	T	stop_gained	APC	NM_000038.5	c.637C>T	p.Arg213*	4460	4015	443	9.93	411	223	187	45.5
CTDC26	5	112175407	112175407	-	C	frameshift_variant	APC	NM_000038.5	c.4118dupC	p.Glu1374fs	1707	1623	84	4.92	352	291	61	17.33
CTDC26	17	7577022	7577022	G	A	stop_gained	TP53	NM_000546.5	c.916C>T	p.Arg306*	1538	1161	377	24.51	310	75	235	75.81
CTDC28	5	112175639	112175639	C	T	stop_gained	APC	NM_000038.5	c.4348C>T	p.Arg1450*	3213	3171	40	1.24	758	468	290	38.26
CTDC29	17	7578404	7578404	A	T	missense_variant	TP53	NM_000546.5	c.526T>A	p.Cys176Ser	2445	2383	62	2.54	89	61	28	31.46
CTDC34	5	112175348	112175348	G	T	stop_gained	APC	NM_000038.5	c.4057G>T	p.Glu1353*	3489	2877	612	17.54	54	34	20	37.04
CTDC34	17	37871777	37871777	G	A	missense_variant	ERBB2	NM_004448.2	c.1301G>A	p.Arg434Gln	13248	13223	14	0.105676	96	86	10	10.42
CTDC35	5	112175423	112175423	C	T	stop_gained	APC	NM_000038.5	c.4132C>T	p.Gln1378*	4122	896	3224	78.21	512	391	121	23.63
CTDC35	17	7577085	7577085	C	T	missense_variant	TP53	NM_000546.5	c.853G>A	p.Glu285Lys	3614	1020	2594	71.78	730	592	136	18.63
CTDC36	5	112175162	112175162	C	T	stop_gained	APC	NM_000038.5	c.3871C>T	p.Gln1291*	2459	1756	701	28.51	134	56	78	58.21
CTDC36	17	7577539	7577539	G	A	missense_variant	TP53	NM_000546.5	c.742C>T	p.Arg248Trp	3265	2660	604	18.5	231	113	118	51.08
CTDC37	5	112175576	112175576	C	T	stop_gained	APC	NM_000038.5	c.4285C>T	p.Gln1429*	3428	2510	918	26.78	425	209	216	50.82
CTDC37	17	7572927	7572927	T	C	stop_lost	TP53	NM_000546.5	c.1182A>G	p.Ter394Trpext*?	2325	1692	633	27.23	400	206	194	48.5
CTDC38	5	112176504	112176504	A	T	missense_variant	APC	NM_000038.5	c.5213A>T	p.His1738Leu	2093	2090	1	0.0477783	148	116	32	21.62
CTDC39	7	55220308	55220308	A	C	missense_variant	EGFR	NM_005228.3	c.698A>C	p.His233Pro	11703	11662	22	0.187986	75	65	10	13.33
CTDC41	5	112175639	112175639	C	T	stop_gained	APC	NM_000038.5	c.4348C>T	p.Arg1450*	3145	3118	23	0.73132	392	202	190	48.47
CTDC41	17	7577144	7577144	A	C	missense_variant	TP53	NM_000546.5	c.794T>G	p.Leu265Arg	1602	1589	13	0.811486	484	238	246	50.83
CTDC42	5	112174466	112174466	G	T	stop_gained	APC	NM_000038.5	c.3175G>T	p.Glu1059*	1371	1350	21	1.53	1333	703	630	47.26
CTDC42	5	112175707	112175707	A	-	frameshift_variant	APC	NM_000038.5	c.4418delA	p.Asn1473fs	2103	2102	0	0	1277	1082	194	15.2
CTDC42	17	7577127	7577127	C	T	missense_variant	TP53	NM_000546.5	c.811G>A	p.Glu271Lys	1451	1442	9	0.620262	989	504	484	48.94
CTDC43	5	112175426	112175426	G	T	stop_gained	APC	NM_000038.5	c.4135G>T	p.Glu1379*	8072	6983	1085	13.44	880	625	255	28.98
CTDC45	5	112151251	112151252	CT	-	frameshift_variant	APC	NM_000038.5	c.896_897delCT	p.Ser299fs	18040	13556	4480	24.83	92	76	16	17.39
CTDC46	5	112157650	112157650	C	A	stop_gained	APC	NM_000038.5	c.1370C>A	p.Ser457*	3643	2533	1110	30.47	1502	1206	296	19.71
CTDC46	5	112175480	112175480	G	T	stop_gained	APC	NM_000038.5	c.4189G>T	p.Glu1397*	2253	1738	514	22.81	1054	852	202	19.17
CTDC46	17	7577120	7577120	C	T	missense_variant	TP53	NM_000546.5	c.818G>A	p.Arg273His	2300	1125	1175	51.09	1128	655	473	41.93
CTDC47	5	112174631	112174631	C	T	stop_gained	APC	NM_000038.5	c.3340C>T	p.Arg1114*	6318	3602	2715	42.97	1440	558	878	60.97
CTDC48	5	112173560	112173560	C	T	stop_gained	APC	NM_000038.5	c.2269C>T	p.Gln757*	7537	7522	3	0.0398036	910	752	158	17.36
CTDC48	5	112175951	112175951	-	A	frameshift_variant	APC	NM_000038.5	c.4666dupA	p.Thr1556fs	7927	7916	0	0	752	499	253	33.64
CTDC48	17	7578526	7578526	C	T	missense_variant	TP53	NM_000546.5	c.404G>A	p.Cys135Tyr	9874	9856	14	0.141787	861	441	418	48.55
CTDC52	5	112175358	112175358	C	A	stop_gained	APC	NM_000038.5	c.4067C>A	p.Ser1356*	653	602	51	7.81	39	24	15	38.46
CTDC52	17	7577081	7577081	T	C	missense_variant	TP53	NM_000546.5	c.857A>G	p.Glu286Gly	1149	1090	59	5.13	118	106	12	10.17
CTDC52	17	7577551	7577551	C	A	missense_variant	TP53	NM_000546.5	c.730G>T	p.Gly244Cys	1576	1520	56	3.55	176	137	39	22.16
CTDC62	17	7578530	7578530	A	G	missense_variant	TP53	NM_000546.5	c.400T>C	p.Phe134Leu	9544	9077	466	4.88	252	225	27	10.71
CTDC63	5	112174179	112174179	-	T	frameshift_variant	APC	NM_000038.5	c.2891dupT	p.Leu964fs	2560	2363	197	7.7	526	213	313	59.51
CTDC63	17	7578479	7578479	G	A	missense_variant	TP53	NM_000546.5	c.451C>T	p.Pro151Ser	5020	4760	259	5.16	452	264	188	41.59
CTDC64	5	112136985	112136985	C	T	stop_gained	APC	NM_000038.5	c.739C>T	p.Gln247*	4760	1782	2975	62.51	168	90	78	46.43
CTDC64	17	7577022	7577022	G	A	stop_gained	TP53	NM_000546.5	c.916C>T	p.Arg306*	2562	1018	1539	60.07	51	14	37	72.55
CTDC66	5	112173917	112173917	C	T	stop_gained	APC	NM_000038.5	c.2626C>T	p.Arg876*	4879	2651	2220	45.5	1744	1184	560	32.11
CTDC66	10	89717644	89717644	-	AT	frameshift_variant	PTEN	NM_000314.4	c.674_675dupAT	p.Ser226fs	8913	4362	4488	50.35	2257	943	1309	58
CTDC66	17	7577094	7577094	G	A	missense_variant	TP53	NM_000546.5	c.844C>T	p.Arg282Trp	3223	967	2255	69.97	973	428	544	55.91
CTDC67	3	178936091	178936091	G	A	missense_variant	PIK3CA	NM_006218.2	c.1633G>A	p.Glu545Lys	3467	2157	1310	37.78	285	206	79	27.72
CTDC67	5	112155002	112155002	G	T	stop_gained	APC	NM_000038.5	c.1273G>T	p.Glu425*	6255	4086	2164	34.6	254	201	53	20.87
CTDC67	17	7577095	7577095	G	T	missense_variant	TP53	NM_000546.5	c.843C>A	p.Asp281Glu	2008	647	1359	67.68	98	64	34	34.69
CTDC68	5	112173714	112173715	AT	-	frameshift_variant	APC	NM_000038.5	c.2424_2425delTA	p.Asp808fs	4700	4691	0	0	457	391	66	14.44
CTDC68	5	112175480	112175481	GA	-	frameshift_variant	APC	NM_000038.5	c.4192_4193delAG	p.Arg1399fs	4348	4331	0	0	488	428	60	12.3
CTDC68	17	7577075	7577087	TTCTCTT CCTCTG	-	frameshift_variant	TP53	NM_000546.5	c.851_863delCAGAGGAAGAGAA	p.Thr284fs	5569	5540	0	0	378	248	130	34.39
CTDC69	5	112151261	112151261	C	T	stop_gained	APC	NM_000038.5	c.904C>T	p.Arg302*	5002	4696	305	6.1	1630	1006	624	38.28
CTDC69	5	112175423	112175423	C	T	stop_gained	APC	NM_000038.5	c.4132C>T	p.Gln1378*	2295	2175	120	5.23	1052	844	208	19.77
CTDC72	12	56488225	56488225	G	A	missense_variant	ERBB3	NM_001982.3	c.1744G>A	p.Gly582Arg	5072	4822	250	4.93	1294	655	639	49.38
CTDC72	17	7577141	7577141	C	T	missense_variant	TP53	NM_000546.5	c.797G>A	p.Gly266Glu	3260	3184	75	2.3	923	413	510	55.25
CTDC72	17	37879658	37879658	G	A	missense_variant	ERBB2	NM_004448.2	c.2033G>A	p.Arg678Gln	3677	3563	110	2.99	1144	793	351	30.68
CTDC73	5	112128143	112128143	C	T	stop_gained & splice_region_variant	APC	NM_000038.5	c.646C>T	p.Arg216*	3097	2901	190	6.13	827	67	760	91.9
CTDC73	17	7577120	7577120	C	T	missense_variant	TP53	NM_000546.5	c.818G>A	p.Arg273His	3897	3736	158	4.05	637	96	541	84.93
CTDC74	5	112175162	112175162	C	T	stop_gained	APC	NM_000038.5	c.3871C>T	p.Gln1291*	1620	1408	211	13.02	67	53	14	20.9
CTDC74	3	178936091	178936091	G	A	missense_variant	PIK3CA	NM_006218.2	c.1633G>A	p.Glu545Lys	2777	2770	1	0.0360101	966	269	697	72.15
CTDC74	12	25380276	25380276	T	A	missense_variant	KRAS	NM_033360.2	c.182A>T	p.Gln61Leu	3640	3628	11	0.302198	453	403	50	11.04
CTDC75	5	112175235	112175235	C	A	stop_gained	APC	NM_000038.5	c.3944C>A	p.Ser1315*	2337	1156	1181	50.53	754	375	379	50.27
CTDC75	17	7578199	7578199	A	C	missense_variant	TP53	NM_000546.5	c.650T>G	p.Val217Gly	2357	767	1588	67.43	822	237	585	71.17
CTDC77	7	140453136	140453136	A	T	missense_variant	BRAF	XM_005250045.1	c.1799T>A	p.Val600Glu	4050	4024	18	0.444444	387	241	146	37.73
CTDC77	17	7574003	7574003	G	A	stop_gained	TP53	NM_000546.5	c.1024C>T	p.Arg342*	4314	4284	19	0.440427	109	68	41	37.61
CTDC79	10	89692905	89692905	G	A	missense_variant	PTEN	NM_000314.4	c.389G>A	p.Arg130Gln	25343	25054	268	1.06	711	181	529	74.4
CTDC79	3	178916876	178916876	G	A	missense_variant	PIK3CA	NM_006218.2	c.263G>A	p.Arg88Gln	7199	7173	2	0.0277816	268	183	84	31.34
CTDC79	5	112174631	112174631	C	T	stop_gained	APC	NM_000038.5	c.3340C>T	p.Arg1114*	6329	6266	48	0.758414	224	152	72	32.14
CTDC79	5	112175921	112175921	G	T	stop_gained	APC	NM_000038.5	c.4630G>T	p.Glu1544*	4096	4064	25	0.610352	143	100	43	30.07
CTDC79	5	112178781	112178781	C	T	missense_variant	APC	NM_000038.5	c.7490C>T	p.Ser2497Leu	5144	5121	5	0.0972006	135	84	51	37.78
CTDC79	5	112179011	112179011	C	A	missense_variant	APC	NM_000038.5	c.7720C>A	p.Leu2574Ile	4495	4480	10	0.222469	151	107	44	29.14
CTDC79	5	149498372	149498372	G	A	missense_variant	PDGFRB	NM_002609.3	c.2842C>T	p.Arg948Trp	14023	13834	5	0.0356557	303	226	77	25.41
CTDC79	5	149499089	149499089	G	T	missense_variant	PDGFRB	NM_002609.3	c.2739C>A	p.Phe913Leu	21599	21508	50	0.231492	381	287	94	24.67
CTDC79	7	55270242	55270242	C	A	missense_variant	EGFR	NM_005228.3	c.3195C>A	p.Phe1065Leu	6583	6569	7	0.106334	101	60	41	40.59
CTDC79	7	116397750	116397750	T	C	missense_variant	MET	XM_005250353.1	c.2081T>C	p.Leu694Pro	17735	17624	52	0.293206	1078	661	415	38.5
CTDC79	17	7578212	7578212	G	A	stop_gained	TP53	NM_000546.5	c.637C>T	p.Arg213*	5742	5684	34	0.592128	86	26	60	69.77
CTDC79	17	37882905	37882905	T	C	missense_variant	ERBB2	NM_004448.2	c.2963T>C	p.Val988Ala	8307	8214	7	0.0842663	246	170	76	30.89
CTDC80	7	140453136	140453136	A	T	missense_variant	BRAF	XM_005250045.1	c.1799T>A	p.Val600Glu	4359	4332	27	0.619408	1532	1317	215	14.03
CTDC80	15	66777482	66777482	C	T	missense_variant	MAP2K1	NM_002755.3	c.848C>T	p.Ala283Val	17841	17721	75	0.42038	1436	1200	231	16.09
CTDC80	17	7579361	7579362	AA	-	frameshift_variant	TP53	NM_000546.5	c.325_326delTT	p.Phe109fs	5407	5398	21	0.388385	521	441	80	15.36
CTDC81	5	112116592	112116592	C	T	stop_gained	APC	NM_000038.5	c.637C>T	p.Arg213*	4102	3629	465	11.34	1219	995	221	18.13
CTDC81	17	7577539	7577539	G	A	missense_variant	TP53	NM_000546.5	c.742C>T	p.Arg248Trp	5435	3827	1607	29.57	497	344	153	30.78
CTDC82	5	112162891	112162891	C	T	stop_gained	APC	NM_000038.5	c.1495C>T	p.Arg499*	3974	2930	1041	26.2	276	149	127	46.01
CTDC82	5	112175770	112175770	G	-	frameshift_variant	APC	NM_000038.5	c.4480delG	p.Glu1494fs	2788	2180	598	21.45	281	195	86	30.6
CTDC82	5	112179788	112179788	C	T	missense_variant	APC	NM_000038.5	c.8497C>T	p.Arg2833Cys	3372	2608	759	22.51	366	224	141	38.52
CTDC82	17	7574003	7574003	G	A	stop_gained	TP53	NM_000546.5	c.1024C>T	p.Arg342*	4039	2921	1114	27.58	192	112	80	41.67
CTDC82	17	7578263	7578263	G	A	stop_gained	TP53	NM_000546.5	c.586C>T	p.Arg196*	3719	2707	1008	27.1	323	186	137	42.41
CTDC83	5	112174282	112174282	T	A	stop_gained	APC	NM_000038.5	c.2991T>A	p.Tyr997*	2637	2097	540	20.48	668	526	142	21.26
CTDC83	17	7577074	7577074	-	T	frameshift_variant	TP53	NM_000546.5	c.863dupA	p.Asn288fs	3369	2130	1238	36.75	1011	450	561	55.49
CTDC84	5	112128143	112128143	C	T	stop_gained & splice_region_variant	APC	NM_000038.5	c.646C>T	p.Arg216*	3400	2763	630	18.53	192	149	43	22.4
CTDC84	7	116371798	116371798	G	A	missense_variant	MET	XM_005250353.1	c.1334G>A	p.Arg445His	15802	10501	5294	33.5	487	327	160	32.85
CTDC84	17	7577548	7577548	C	T	missense_variant	TP53	NM_000546.5	c.733G>A	p.Gly245Ser	4903	3120	1778	36.26	263	179	84	31.94
CTDC85	5	112175303	112175303	C	T	stop_gained	APC	NM_000038.5	c.4012C>T	p.Gln1338*	1057	1034	23	2.18	199	107	92	46.23
CTDC85	12	25398284	25398284	C	T	missense_variant	KRAS	NM_033360.2	c.35G>A	p.Gly12Asp	1335	1317	18	1.35	207	167	40	19.32
CTDC85	10	89720811	89720811	-	A	frameshift_variant	PTEN	NM_000314.4	c.968dupA	p.Asn323fs	6483	6453	0	0	1526	1163	360	23.59
CTDC87	17	7577539	7577539	G	A	missense_variant	TP53	NM_000546.5	c.742C>T	p.Arg248Trp	3625	3139	484	13.35	334	291	43	12.87
CTDC89	3	178936095	178936095	A	G	missense_variant	PIK3CA	NM_006218.2	c.1637A>G	p.Gln546Arg	4129	4063	64	1.55	971	818	153	15.76
CTDC89	5	112176555	112176555	C	T	missense_variant	APC	NM_000038.5	c.5264C>T	p.Ala1755Val	1938	1904	30	1.55	251	175	76	30.28
CTDC90	5	112175472	112175473	AT	-	frameshift_variant	APC	NM_000038.5	c.4182_4183delTA	p.Asp1394fs	2177	2148	29	1.33	276	146	130	47.1
CTDC90	17	7577557	7577557	A	T	missense_variant	TP53	NM_000546.5	c.724T>A	p.Cys242Ser	3847	3764	80	2.08	318	146	171	53.77
CTDC90	5	112157613	112157613	C	T	stop_gained	APC	NM_000038.5	c.1333C>T	p.Gln445*	4477	4414	42	0.938128	565	484	81	14.34
CTDC90	12	56492655	56492655	C	G	missense_variant	ERBB3	NM_001982.3	c.2805C>G	p.Ile935Met	5263	5196	40	0.760023	654	549	103	15.75
CTDC92	5	112173917	112173917	C	T	stop_gained	APC	NM_000038.5	c.2626C>T	p.Arg876*	2581	489	2090	80.98	417	290	127	30.46
CTDC93	5	112175235	112175235	C	G	stop_gained	APC	NM_000038.5	c.3944C>G	p.Ser1315*	4437	4424	2	0.0450755	219	180	39	17.81
2) 141 mutations in ctDNA
ID	Chr	Pos_start	Pos_end	Ref	Alt	Mutation type	Gene	Transcript	Base change	AA change	Baseline cfDNA				Tissue
											Total reads	Ref. reads	Var. reads	VAF(%)	Total reads	Ref. reads	Var. reads	VAF(%)
CTDC04	5	112090592	112090592	C	T	missense_variant	APC	NM_000038.5	c.5C>T	p.Ala2Val	2584	2465	118	4.57	1000	699	301	30.1
CTDC04	5	112151261	112151261	C	T	stop_gained	APC	NM_000038.5	c.904C>T	p.Arg302*	6984	6697	286	4.1	1470	1079	387	26.33
CTDC04	5	112175891	112175891	G	-	frameshift_variant	APC	NM_000038.5	c.4602delG	p.Asn1535fs	3144	3035	109	3.47	1109	780	329	29.67
CTDC04	5	112176660	112176660	-	A	frameshift_variant	APC	NM_000038.5	c.5375dupA	p.Asn1792fs	1287	1256	21	1.63	896	799	95	10.6
CTDC04	17	7578212	7578212	G	A	stop_gained	TP53	NM_000546.5	c.637C>T	p.Arg213*	4779	4554	217	4.54	787	476	311	39.52
CTDC05	5	112175423	112175423	C	T	stop_gained	APC	NM_000038.5	c.4132C>T	p.Gln1378*	1734	1704	30	1.73	554	550	2	0.361011
CTDC05	5	112175760	112175787	ATTTTGCC ACGGAAAG TACTCCAG ATGG	-	frameshift_variant	APC	NM_000038.5	c.4474_4501delGCCACGGAAAGTACTCCAGATGGATTTT	p.Ala1492fs	2840	2806	32	1.13	348	190	158	45.4
CTDC05	17	7577056	7577056	-	T	frameshift_variant	TP53	NM_000546.5	c.881dupA	p.Pro295fs	2469	2390	77	3.12	647	166	481	74.34
CTDC05	17	37881000	37881000	G	T	missense_variant	ERBB2	NM_004448.2	c.2329G>T	p.Val777Leu	3135	2285	850	27.11	13365	664	12698	95.01
CTDC06	5	112175171	112175171	C	T	stop_gained	APC	NM_000038.5	c.3880C>T	p.Gln1294*	2865	2364	501	17.49	609	368	241	39.57
CTDC06	17	7577532	7577532	G	A	missense_variant	TP53	NM_000546.5	c.749C>T	p.Pro250Leu	2843	2495	348	12.24	870	580	290	33.33
CTDC06	17	7578475	7578475	G	A	missense_variant	TP53	NM_000546.5	c.455C>T	p.Pro152Leu	2645	2484	161	6.09	838	704	134	15.99
CTDC11	17	7577574	7577574	T	C	missense_variant	TP53	NM_000546.5	c.707A>G	p.Tyr236Cys	3769	2877	891	23.64	151	108	43	28.48
CTDC11	17	7577120	7577120	C	T	missense_variant	TP53	NM_000546.5	c.818G>A	p.Arg273His	4004	2269	1735	43.33	165	102	63	38.18
CTDC13	5	112173917	112173917	C	T	stop_gained	APC	NM_000038.5	c.2626C>T	p.Arg876*	4125	3944	181	4.39	1242	939	303	24.4
CTDC14	5	112175273	112175273	C	T	stop_gained	APC	NM_000038.5	c.3982C>T	p.Gln1328*	2513	545	1967	78.27	1464	1072	392	26.78
CTDC14	17	7577124	7577124	C	T	missense_variant	TP53	NM_000546.5	c.814G>A	p.Val272Met	1757	481	1276	72.62	1084	823	261	24.08
CTDC15	5	112173917	112173917	C	T	stop_gained	APC	NM_000038.5	c.2626C>T	p.Arg876*	3965	3832	133	3.35	1557	1219	336	21.58
CTDC15	17	7577519	7577527	GATGG TGAG	-	conservative_inframe_deletion	TP53	NM_000546.5	c.754_762delCTCACCATC	p.Leu252_Ile254del	2421	2341	79	3.26	947	765	182	19.22
CTDC16	5	112175232	112175232	G	-	frameshift_variant	APC	NM_000038.5	c.3942delG	p.Arg1314fs	2119	1914	205	9.67	1413	1052	359	25.41
CTDC16	17	7578442	7578442	T	C	missense_variant	TP53	NM_000546.5	c.488A>G	p.Tyr163Cys	1915	1827	88	4.6	2169	1781	388	17.89
CTDC17	5	112157650	112157650	C	A	stop_gained	APC	NM_000038.5	c.1370C>A	p.Ser457*	2218	1517	698	31.47	640	434	206	32.19
CTDC17	17	7577574	7577574	T	C	missense_variant	TP53	NM_000546.5	c.707A>G	p.Tyr236Cys	2770	2206	564	20.36	572	394	178	31.12
CTDC18	5	112175358	112175358	C	A	stop_gained	APC	NM_000038.5	c.4067C>A	p.Ser1356*	1152	1068	84	7.29	703	430	273	38.83
CTDC18	17	7578263	7578263	G	A	stop_gained	TP53	NM_000546.5	c.586C>T	p.Arg196*	4855	4603	250	5.15	982	607	375	38.19
CTDC19	5	112173837	112173838	AT	-	frameshift_variant	APC	NM_000038.5	c.2547_2548delTA	p.Asp849fs	1905	1789	115	6.04	1146	1067	78	6.81
CTDC19	5	112175339	112175339	A	T	stop_gained	APC	NM_000038.5	c.4048A>T	p.Lys1350*	833	702	131	15.73	714	589	125	17.51
CTDC19	17	7577118	7577118	C	A	missense_variant	TP53	NM_000546.5	c.820G>T	p.Val274Phe	989	900	89	9	704	577	127	18.04
CTDC20	5	112175676	112175677	AG	-	frameshift_variant	APC	NM_000038.5	c.4393_4394delAG	p.Ser1465fs	1874	853	1021	54.48	407	385	22	5.41
CTDC20	17	7578190	7578190	T	C	missense_variant	TP53	NM_000546.5	c.659A>G	p.Tyr220Cys	5509	1360	4148	75.29	550	448	102	18.55
CTDC21	5	112154723	112154723	C	T	stop_gained	APC	NM_000038.5	c.994C>T	p.Arg332*	2725	2491	234	8.59	777	522	253	32.56
CTDC21	5	112175650	112175650	-	A	frameshift_variant	APC	NM_000038.5	c.4364dupA	p.Asn1455fs	2716	2445	264	9.72	1299	898	401	30.87
CTDC21	17	7577581	7577581	A	T	missense_variant	TP53	NM_000546.5	c.700T>A	p.Tyr234Asn	2749	2566	183	6.66	927	688	239	25.78
CTDC24	5	112128191	112128191	C	T	stop_gained	APC	NM_000038.5	c.694C>T	p.Arg232*	2342	2292	50	2.13	1239	1022	217	17.51
CTDC24	17	7577094	7577094	G	A	missense_variant	TP53	NM_000546.5	c.844C>T	p.Arg282Trp	1335	1266	69	5.17	970	576	394	40.62
CTDC25	5	112164616	112164616	C	T	stop_gained	APC	NM_000038.5	c.1690C>T	p.Arg564*	8262	6669	1588	19.22	3469	3260	207	5.97
CTDC25	5	112175255	112175255	G	T	stop_gained	APC	NM_000038.5	c.3964G>T	p.Glu1322*	2546	1463	1083	42.54	1308	1221	87	6.65
CTDC25	17	7577548	7577548	C	T	missense_variant	TP53	NM_000546.5	c.733G>A	p.Gly245Ser	1848	878	970	52.49	1029	889	140	13.61
CTDC26	5	112116592	112116592	C	T	stop_gained	APC	NM_000038.5	c.637C>T	p.Arg213*	4460	4015	443	9.93	411	223	187	45.5
CTDC26	5	112175407	112175407	-	C	frameshift_variant	APC	NM_000038.5	c.4118dupC	p.Glu1374fs	1707	1623	84	4.92	352	291	61	17.33
CTDC26	17	7577022	7577022	G	A	stop_gained	TP53	NM_000546.5	c.916C>T	p.Arg306*	1538	1161	377	24.51	310	75	235	75.81
CTDC28	5	112175639	112175639	C	T	stop_gained	APC	NM_000038.5	c.4348C>T	p.Arg1450*	3213	3171	40	1.24	758	468	290	38.26
CTDC29	17	7578404	7578404	A	T	missense_variant	TP53	NM_000546.5	c.526T>A	p.Cys176Ser	2445	2383	62	2.54	89	61	28	31.46
CTDC34	5	112175348	112175348	G	T	stop_gained	APC	NM_000038.5	c.4057G>T	p.Glu1353*	3489	2877	612	17.54	54	34	20	37.04
CTDC34	17	7578406	7578406	C	T	missense_variant	TP53	NM_000546.5	c.524G>A	p.Arg175His	4047	3704	342	8.45	20	16	4	20
CTDC34	17	7579432	7579432	-	G	frameshift_variant	TP53	NM_000546.5	c.254dupC	p.Ala86fs	7028	6756	263	3.74	101	99	2	1.9802
CTDC35	5	112175423	112175423	C	T	stop_gained	APC	NM_000038.5	c.4132C>T	p.Gln1378*	4122	896	3224	78.21	512	391	121	23.63
CTDC35	17	7577085	7577085	C	T	missense_variant	TP53	NM_000546.5	c.853G>A	p.Glu285Lys	3614	1020	2594	71.78	730	592	136	18.63
CTDC36	5	112175162	112175162	C	T	stop_gained	APC	NM_000038.5	c.3871C>T	p.Gln1291*	2459	1756	701	28.51	134	56	78	58.21
CTDC36	17	7577539	7577539	G	A	missense_variant	TP53	NM_000546.5	c.742C>T	p.Arg248Trp	3265	2660	604	18.5	231	113	118	51.08
CTDC37	5	112175576	112175576	C	T	stop_gained	APC	NM_000038.5	c.4285C>T	p.Gln1429*	3428	2510	918	26.78	425	209	216	50.82
CTDC37	17	7572927	7572927	T	C	stop_lost	TP53	NM_000546.5	c.1182A>G	p.Ter394Trpext*?	2325	1692	633	27.23	400	206	194	48.5
CTDC37	17	37879588	37879588	A	G	missense_variant	ERBB2	NM_004448.2	c.1963A>G	p.Ile655Val	2637	2548	89	3.38	568	562	2	0.352113
CTDC37	17	37884037	37884037	C	G	missense_variant	ERBB2	NM_004448.2	c.3508C>G	p.Pro1170Ala	2444	2364	80	3.27	1148	1145	3	0.261324
CTDC38	5	112175255	112175255	G	T	stop_gained	APC	NM_000038.5	c.3964G>T	p.Glu1322*	2142	578	1561	72.88	291	265	26	8.93471
CTDC38	17	7578212	7578212	G	A	stop_gained	TP53	NM_000546.5	c.637C>T	p.Arg213*	2396	774	1616	67.56	344	335	8	2.32558
CTDC39	5	112154723	112154723	C	T	stop_gained	APC	NM_000038.5	c.994C>T	p.Arg332*	3460	2071	1389	40.14	31	23	8	25.81
CTDC39	5	112175951	112175951	-	A	frameshift_variant	APC	NM_000038.5	c.4666dupA	p.Thr1556fs	1995	1198	797	39.95	118	112	6	5.08475
CTDC41	17	37879588	37879588	A	G	missense_variant	ERBB2	NM_004448.2	c.1963A>G	p.Ile655Val	1272	1243	29	2.28	507	506	0	0
CTDC42	5	112174466	112174466	G	T	stop_gained	APC	NM_000038.5	c.3175G>T	p.Glu1059*	1371	1350	21	1.53	1333	703	630	47.26
CTDC43	5	112175426	112175426	G	T	stop_gained	APC	NM_000038.5	c.4135G>T	p.Glu1379*	8072	6983	1085	13.44	880	625	255	28.98
CTDC45	5	112128143	112128143	C	T	stop_gained & splice_region_variant	APC	NM_000038.5	c.646C>T	p.Arg216*	7386	5208	2173	29.42	37	30	7	18.9189
CTDC45	5	112151251	112151252	CT	-	frameshift_variant	APC	NM_000038.5	c.896_897delCT	p.Ser299fs	18040	13556	4480	24.83	92	76	16	17.39
CTDC45	17	7577022	7577022	G	A	stop_gained	TP53	NM_000546.5	c.916C>T	p.Arg306*	7360	2860	4497	61.1	16	10	6	37.5
CTDC46	5	112157627	112157628	TG	-	frameshift_variant	APC	NM_000038.5	c.1354_1355delGT	p.Val452fs	3416	2915	501	14.67	1479	1478	1	0.0676133
CTDC46	5	112157650	112157650	C	A	stop_gained	APC	NM_000038.5	c.1370C>A	p.Ser457*	3643	2533	1110	30.47	1502	1206	296	19.71
CTDC46	5	112175480	112175480	G	T	stop_gained	APC	NM_000038.5	c.4189G>T	p.Glu1397*	2253	1738	514	22.81	1054	852	202	19.17
CTDC46	17	7577120	7577120	C	T	missense_variant	TP53	NM_000546.5	c.818G>A	p.Arg273His	2300	1125	1175	51.09	1128	655	473	41.93
CTDC47	5	112174631	112174631	C	T	stop_gained	APC	NM_000038.5	c.3340C>T	p.Arg1114*	6318	3602	2715	42.97	1440	558	878	60.97
CTDC52	5	112175358	112175358	C	A	stop_gained	APC	NM_000038.5	c.4067C>A	p.Ser1356*	653	602	51	7.81	39	24	15	38.46
CTDC52	5	112177122	112177122	G	T	missense_variant	APC	NM_000038.5	c.5831G>T	p.Gly1944Val	793	776	17	2.14	255	255	0	0
CTDC52	5	149499583	149499583	A	T	missense_variant	PDGFRB	NM_002609.3	c.2690T>A	p.Phe897Tyr	7123	6968	153	2.15	435	434	1	0.229885
CTDC52	7	55229255	55229255	G	A	missense_variant	EGFR	NM_005228.3	c.1562G>A	p.Arg521Lys	2267	2207	60	2.65	567	563	4	0.705467
CTDC52	17	7577081	7577081	T	C	missense_variant	TP53	NM_000546.5	c.857A>G	p.Glu286Gly	1149	1090	59	5.13	118	106	12	10.17
CTDC52	17	7577551	7577551	C	A	missense_variant	TP53	NM_000546.5	c.730G>T	p.Gly244Cys	1576	1520	56	3.55	176	137	39	22.16
CTDC52	17	37864615	37864615	C	-	frameshift_variant	ERBB2	NM_004448.2	c.268delC	p.Gln90fs	1846	1804	40	2.17	137	137	0	0
CTDC62	5	112151261	112151261	C	T	stop_gained	APC	NM_000038.5	c.904C>T	p.Arg302*	8976	8625	347	3.87	315	286	29	9.21
CTDC62	5	112173944	112173944	G	A	missense_variant	APC	NM_000038.5	c.2653G>A	p.Ala885Thr	6141	5899	241	3.92	369	362	5	1.35501
CTDC62	5	112175251	112175252	GA	-	frameshift_variant	APC	NM_000038.5	c.3961_3962delAG	p.Ser1321fs	5177	4929	245	4.73	175	167	8	4.57
CTDC62	17	7578530	7578530	A	G	missense_variant	TP53	NM_000546.5	c.400T>C	p.Phe134Leu	9544	9077	466	4.88	252	225	27	10.71
CTDC62	17	37884037	37884037	C	G	missense_variant	ERBB2	NM_004448.2	c.3508C>G	p.Pro1170Ala	6831	4161	2667	39.04	77	77	0	0
CTDC63	5	112174179	112174179	-	T	frameshift_variant	APC	NM_000038.5	c.2891dupT	p.Leu964fs	2560	2363	197	7.7	526	213	313	59.51
CTDC63	17	7578479	7578479	G	A	missense_variant	TP53	NM_000546.5	c.451C>T	p.Pro151Ser	5020	4760	259	5.16	452	264	188	41.59
CTDC64	5	112136985	112136985	C	T	stop_gained	APC	NM_000038.5	c.739C>T	p.Gln247*	4760	1782	2975	62.51	168	90	78	46.43
CTDC64	17	7577022	7577022	G	A	stop_gained	TP53	NM_000546.5	c.916C>T	p.Arg306*	2562	1018	1539	60.07	51	14	37	72.55
CTDC66	5	112173917	112173917	C	T	stop_gained	APC	NM_000038.5	c.2626C>T	p.Arg876*	4879	2651	2220	45.5	1744	1184	560	32.11
CTDC66	10	89717644	89717644	-	AT	frameshift_variant	PTEN	NM_000314.4	c.674_675dupAT	p.Ser226fs	8913	4362	4488	50.35	2257	943	1309	58
CTDC66	17	7577094	7577094	G	A	missense_variant	TP53	NM_000546.5	c.844C>T	p.Arg282Trp	3223	967	2255	69.97	973	428	544	55.91
CTDC67	3	178936091	178936091	G	A	missense_variant	PIK3CA	NM_006218.2	c.1633G>A	p.Glu545Lys	3467	2157	1310	37.78	285	206	79	27.72
CTDC67	5	112155002	112155002	G	T	stop_gained	APC	NM_000038.5	c.1273G>T	p.Glu425*	6255	4086	2164	34.6	254	201	53	20.87
CTDC67	5	112175446	112175456	CAGATG TACTT	-	frameshift_variant	APC	NM_000038.5	c.4156_4166delAGATGTACTTC	p.Arg1386fs	2493	1733	760	30.49	83	81	2	2.40964
CTDC67	17	7577095	7577095	G	T	missense_variant	TP53	NM_000546.5	c.843C>A	p.Asp281Glu	2008	647	1359	67.68	98	64	34	34.69
CTDC69	5	112151261	112151261	C	T	stop_gained	APC	NM_000038.5	c.904C>T	p.Arg302*	5002	4696	305	6.1	1630	1006	624	38.28
CTDC69	5	112175423	112175423	C	T	stop_gained	APC	NM_000038.5	c.4132C>T	p.Gln1378*	2295	2175	120	5.23	1052	844	208	19.77
CTDC72	12	56488225	56488225	G	A	missense_variant	ERBB3	NM_001982.3	c.1744G>A	p.Gly582Arg	5072	4822	250	4.93	1294	655	639	49.38
CTDC72	17	7577141	7577141	C	T	missense_variant	TP53	NM_000546.5	c.797G>A	p.Gly266Glu	3260	3184	75	2.3	923	413	510	55.25
CTDC72	17	37879658	37879658	G	A	missense_variant	ERBB2	NM_004448.2	c.2033G>A	p.Arg678Gln	3677	3563	110	2.99	1144	793	351	30.68
CTDC73	5	112128143	112128143	C	T	stop_gained & splice_region_variant	APC	NM_000038.5	c.646C>T	p.Arg216*	3097	2901	190	6.13	827	67	760	91.9
CTDC73	17	7577120	7577120	C	T	missense_variant	TP53	NM_000546.5	c.818G>A	p.Arg273His	3897	3736	158	4.05	637	96	541	84.93
CTDC74	5	112175162	112175162	C	T	stop_gained	APC	NM_000038.5	c.3871C>T	p.Gln1291*	1620	1408	211	13.02	67	53	14	20.9
CTDC75	5	112175235	112175235	C	A	stop_gained	APC	NM_000038.5	c.3944C>A	p.Ser1315*	2337	1156	1181	50.53	754	375	379	50.27
CTDC75	12	56494894	56494894	T	G	missense_variant	ERBB3	NM_001982.3	c.3251T>G	p.Leu1084Arg	3324	2787	535	16.1	1227	1224	1	0.0814996
CTDC75	17	7578199	7578199	A	C	missense_variant	TP53	NM_000546.5	c.650T>G	p.Val217Gly	2357	767	1588	67.43	822	237	585	71.17
CTDC79	10	89692905	89692905	G	A	missense_variant	PTEN	NM_000314.4	c.389G>A	p.Arg130Gln	25343	25054	268	1.06	711	181	529	74.4
CTDC81	5	112116592	112116592	C	T	stop_gained	APC	NM_000038.5	c.637C>T	p.Arg213*	4102	3629	465	11.34	1219	995	221	18.13
CTDC81	17	7577539	7577539	G	A	missense_variant	TP53	NM_000546.5	c.742C>T	p.Arg248Trp	5435	3827	1607	29.57	497	344	153	30.78
CTDC81	17	37855834	37855834	C	A	missense_variant	ERBB2	XM_005257139.1	c.22C>A	p.Pro8Thr	5763	5295	463	8.03	863	857	4	0.463499
CTDC81	17	37879588	37879588	A	G	missense_variant	ERBB2	NM_004448.2	c.1963A>G	p.Ile655Val	3071	2403	664	21.62	297	296	0	0
CTDC81	17	37884037	37884037	C	G	missense_variant	ERBB2	NM_004448.2	c.3508C>G	p.Pro1170Ala	7346	5424	1921	26.15	245	245	0	0
CTDC82	5	112162891	112162891	C	T	stop_gained	APC	NM_000038.5	c.1495C>T	p.Arg499*	3974	2930	1041	26.2	276	149	127	46.01
CTDC82	5	112175770	112175770	G	-	frameshift_variant	APC	NM_000038.5	c.4480delG	p.Glu1494fs	2788	2180	598	21.45	281	195	86	30.6
CTDC82	5	112179788	112179788	C	T	missense_variant	APC	NM_000038.5	c.8497C>T	p.Arg2833Cys	3372	2608	759	22.51	366	224	141	38.52
CTDC82	17	7574003	7574003	G	A	stop_gained	TP53	NM_000546.5	c.1024C>T	p.Arg342*	4039	2921	1114	27.58	192	112	80	41.67
CTDC82	17	7578263	7578263	G	A	stop_gained	TP53	NM_000546.5	c.586C>T	p.Arg196*	3719	2707	1008	27.1	323	186	137	42.41
CTDC83	5	112174282	112174282	T	A	stop_gained	APC	NM_000038.5	c.2991T>A	p.Tyr997*	2637	2097	540	20.48	668	526	142	21.26
CTDC83	17	7577074	7577074	-	T	frameshift_variant	TP53	NM_000546.5	c.863dupA	p.Asn288fs	3369	2130	1238	36.75	1011	450	561	55.49
CTDC84	5	112128143	112128143	C	T	stop_gained & splice_region_variant	APC	NM_000038.5	c.646C>T	p.Arg216*	3400	2763	630	18.53	192	149	43	22.4
CTDC84	5	112175284	112175288	AACCA	-	frameshift_variant	APC	NM_000038.5	c.3995_3999delCCAAA	p.Thr1332fs	3674	3133	541	14.73	307	283	24	7.82
CTDC84	7	116371798	116371798	G	A	missense_variant	MET	XM_005250353.1	c.1334G>A	p.Arg445His	15802	10501	5294	33.5	487	327	160	32.85
CTDC84	17	7577548	7577548	C	T	missense_variant	TP53	NM_000546.5	c.733G>A	p.Gly245Ser	4903	3120	1778	36.26	263	179	84	31.94
CTDC85	5	112173899	112173899	C	T	missense_variant	APC	NM_000038.5	c.2608C>T	p.Pro870Ser	1190	1162	28	2.35	634	632	2	0.315457
CTDC85	5	112175303	112175303	C	T	stop_gained	APC	NM_000038.5	c.4012C>T	p.Gln1338*	1057	1034	23	2.18	199	107	92	46.23
CTDC85	12	25380179	25380179	A	C	missense_variant	KRAS	NM_033360.2	c.279T>G	p.Ile93Met	1135	1102	32	2.82	201	201	0	0
CTDC85	12	25398284	25398284	C	T	missense_variant	KRAS	NM_033360.2	c.35G>A	p.Gly12Asp	1335	1317	18	1.35	207	167	40	19.32
CTDC85	17	37872035	37872035	G	T	missense_variant	ERBB2	NM_004448.2	c.1356G>T	p.Trp452Cys	812	789	23	2.83	202	201	0	0
CTDC85	17	37879585	37879585	A	G	missense_variant	ERBB2	NM_004448.2	c.1960A>G	p.Ile654Val	356	344	11	3.09	109	105	1	0.917431
CTDC87	7	140453136	140453136	A	T	missense_variant	BRAF	XM_005250045.1	c.1799T>A	p.Val600Glu	4241	3616	625	14.74	811	743	67	8.26
CTDC87	17	7577539	7577539	G	A	missense_variant	TP53	NM_000546.5	c.742C>T	p.Arg248Trp	3625	3139	484	13.35	334	291	43	12.87
CTDC89	3	178936095	178936095	A	G	missense_variant	PIK3CA	NM_006218.2	c.1637A>G	p.Gln546Arg	4129	4063	64	1.55	971	818	153	15.76
CTDC89	5	112176555	112176555	C	T	missense_variant	APC	NM_000038.5	c.5264C>T	p.Ala1755Val	1938	1904	30	1.55	251	175	76	30.28
CTDC89	7	116340262	116340262	A	G	missense_variant	MET	XM_005250353.1	c.1181A>G	p.Asn394Ser	11927	9920	2007	16.83	2548	2543	1	0.0392465
CTDC89	17	37879588	37879588	A	G	missense_variant	ERBB2	NM_004448.2	c.1963A>G	p.Ile655Val	1171	937	232	19.81	161	161	0	0
CTDC90	5	112175472	112175473	AT	-	frameshift_variant	APC	NM_000038.5	c.4182_4183delTA	p.Asp1394fs	2177	2148	29	1.33	276	146	130	47.1
CTDC90	17	7577557	7577557	A	T	missense_variant	TP53	NM_000546.5	c.724T>A	p.Cys242Ser	3847	3764	80	2.08	318	146	171	53.77
CTDC92	5	112173917	112173917	C	T	stop_gained	APC	NM_000038.5	c.2626C>T	p.Arg876*	2581	489	2090	80.98	417	290	127	30.46
CTDC93	3	178952085	178952085	A	G	missense_variant	PIK3CA	NM_006218.2	c.3140A>G	p.His1047Arg	3643	3566	72	1.98	876	874	0	0
CTDC93	5	112116592	112116592	C	T	stop_gained	APC	NM_000038.5	c.637C>T	p.Arg213*	1955	1749	203	10.38	584	576	6	1.0274
CTDC93	5	112173858	112173858	G	A	missense_variant	APC	NM_000038.5	c.2567G>A	p.Arg856His	2134	1935	198	9.28	439	437	0	0
CTDC93	5	112174916	112174916	G	T	stop_gained	APC	NM_000038.5	c.3625G>T	p.Glu1209*	3311	3253	57	1.72	412	410	0	0
CTDC93	12	25398284	25398284	C	T	missense_variant	KRAS	NM_033360.2	c.35G>A	p.Gly12Asp	1846	1669	175	9.48	554	549	2	0.361011
CTDC93	17	7578406	7578406	C	T	missense_variant	TP53	NM_000546.5	c.524G>A	p.Arg175His	3740	3566	170	4.55	48	40	8	16.67
3) 97 mutations in both
ID	Chr	Pos_start	Pos_end	Ref	Alt	Mutation type	Gene	Transcript	Base change	AA change	Baseline cfDNA				Tissue
											Total reads	Ref. reads	Var. reads	VAF(%)	Total reads	Ref. reads	Var. reads	VAF(%)
CTDC04	5	112090592	112090592	C	T	missense_variant	APC	NM_000038.5	c.5C>T	p.Ala2Val	2584	2465	118	4.57	1000	699	301	30.1
CTDC04	5	112151261	112151261	C	T	stop_gained	APC	NM_000038.5	c.904C>T	p.Arg302*	6984	6697	286	4.1	1470	1079	387	26.33
CTDC04	5	112175891	112175891	G	-	frameshift_variant	APC	NM_000038.5	c.4602delG	p.Asn1535fs	3144	3035	109	3.47	1109	780	329	29.67
CTDC04	5	112176660	112176660	-	A	frameshift_variant	APC	NM_000038.5	c.5375dupA	p.Asn1792fs	1287	1256	21	1.63	896	799	95	10.6
CTDC04	17	7578212	7578212	G	A	stop_gained	TP53	NM_000546.5	c.637C>T	p.Arg213*	4779	4554	217	4.54	787	476	311	39.52
CTDC05	5	112175760	112175787	ATTTTGCC ACGGAAAG TACTCCAG ATGG	-	frameshift_variant	APC	NM_000038.5	c.4474_4501delGCCACGGAAAGTACTCCAGATGGATTTT	p.Ala1492fs	2840	2806	32	1.13	348	190	158	45.4
CTDC05	17	7577056	7577056	-	T	frameshift_variant	TP53	NM_000546.5	c.881dupA	p.Pro295fs	2469	2390	77	3.12	647	166	481	74.34
CTDC05	17	37881000	37881000	G	T	missense_variant	ERBB2	NM_004448.2	c.2329G>T	p.Val777Leu	3135	2285	850	27.11	13365	664	12698	95.01
CTDC06	5	112175171	112175171	C	T	stop_gained	APC	NM_000038.5	c.3880C>T	p.Gln1294*	2865	2364	501	17.49	609	368	241	39.57
CTDC06	17	7577532	7577532	G	A	missense_variant	TP53	NM_000546.5	c.749C>T	p.Pro250Leu	2843	2495	348	12.24	870	580	290	33.33
CTDC06	17	7578475	7578475	G	A	missense_variant	TP53	NM_000546.5	c.455C>T	p.Pro152Leu	2645	2484	161	6.09	838	704	134	15.99
CTDC11	17	7577574	7577574	T	C	missense_variant	TP53	NM_000546.5	c.707A>G	p.Tyr236Cys	3769	2877	891	23.64	151	108	43	28.48
CTDC11	17	7577120	7577120	C	T	missense_variant	TP53	NM_000546.5	c.818G>A	p.Arg273His	4004	2269	1735	43.33	165	102	63	38.18
CTDC13	5	112173917	112173917	C	T	stop_gained	APC	NM_000038.5	c.2626C>T	p.Arg876*	4125	3944	181	4.39	1242	939	303	24.4
CTDC14	5	112175273	112175273	C	T	stop_gained	APC	NM_000038.5	c.3982C>T	p.Gln1328*	2513	545	1967	78.27	1464	1072	392	26.78
CTDC14	17	7577124	7577124	C	T	missense_variant	TP53	NM_000546.5	c.814G>A	p.Val272Met	1757	481	1276	72.62	1084	823	261	24.08
CTDC15	5	112173917	112173917	C	T	stop_gained	APC	NM_000038.5	c.2626C>T	p.Arg876*	3965	3832	133	3.35	1557	1219	336	21.58
CTDC15	17	7577519	7577527	GATGG TGAG	-	conservative_inframe_deletion	TP53	NM_000546.5	c.754_762delCTCACCATC	p.Leu252_Ile254del	2421	2341	79	3.26	947	765	182	19.22
CTDC16	5	112175232	112175232	G	-	frameshift_variant	APC	NM_000038.5	c.3942delG	p.Arg1314fs	2119	1914	205	9.67	1413	1052	359	25.41
CTDC16	17	7578442	7578442	T	C	missense_variant	TP53	NM_000546.5	c.488A>G	p.Tyr163Cys	1915	1827	88	4.6	2169	1781	388	17.89
CTDC17	5	112157650	112157650	C	A	stop_gained	APC	NM_000038.5	c.1370C>A	p.Ser457*	2218	1517	698	31.47	640	434	206	32.19
CTDC17	17	7577574	7577574	T	C	missense_variant	TP53	NM_000546.5	c.707A>G	p.Tyr236Cys	2770	2206	564	20.36	572	394	178	31.12
CTDC18	5	112175358	112175358	C	A	stop_gained	APC	NM_000038.5	c.4067C>A	p.Ser1356*	1152	1068	84	7.29	703	430	273	38.83
CTDC18	17	7578263	7578263	G	A	stop_gained	TP53	NM_000546.5	c.586C>T	p.Arg196*	4855	4603	250	5.15	982	607	375	38.19
CTDC19	5	112175339	112175339	A	T	stop_gained	APC	NM_000038.5	c.4048A>T	p.Lys1350*	833	702	131	15.73	714	589	125	17.51
CTDC19	17	7577118	7577118	C	A	missense_variant	TP53	NM_000546.5	c.820G>T	p.Val274Phe	989	900	89	9	704	577	127	18.04
CTDC20	17	7578190	7578190	T	C	missense_variant	TP53	NM_000546.5	c.659A>G	p.Tyr220Cys	5509	1360	4148	75.29	550	448	102	18.55
CTDC21	5	112154723	112154723	C	T	stop_gained	APC	NM_000038.5	c.994C>T	p.Arg332*	2725	2491	234	8.59	777	522	253	32.56
CTDC21	5	112175650	112175650	-	A	frameshift_variant	APC	NM_000038.5	c.4364dupA	p.Asn1455fs	2716	2445	264	9.72	1299	898	401	30.87
CTDC21	17	7577581	7577581	A	T	missense_variant	TP53	NM_000546.5	c.700T>A	p.Tyr234Asn	2749	2566	183	6.66	927	688	239	25.78
CTDC24	5	112128191	112128191	C	T	stop_gained	APC	NM_000038.5	c.694C>T	p.Arg232*	2342	2292	50	2.13	1239	1022	217	17.51
CTDC24	17	7577094	7577094	G	A	missense_variant	TP53	NM_000546.5	c.844C>T	p.Arg282Trp	1335	1266	69	5.17	970	576	394	40.62
CTDC25	17	7577548	7577548	C	T	missense_variant	TP53	NM_000546.5	c.733G>A	p.Gly245Ser	1848	878	970	52.49	1029	889	140	13.61
CTDC26	5	112116592	112116592	C	T	stop_gained	APC	NM_000038.5	c.637C>T	p.Arg213*	4460	4015	443	9.93	411	223	187	45.5
CTDC26	5	112175407	112175407	-	C	frameshift_variant	APC	NM_000038.5	c.4118dupC	p.Glu1374fs	1707	1623	84	4.92	352	291	61	17.33
CTDC26	17	7577022	7577022	G	A	stop_gained	TP53	NM_000546.5	c.916C>T	p.Arg306*	1538	1161	377	24.51	310	75	235	75.81
CTDC28	5	112175639	112175639	C	T	stop_gained	APC	NM_000038.5	c.4348C>T	p.Arg1450*	3213	3171	40	1.24	758	468	290	38.26
CTDC29	17	7578404	7578404	A	T	missense_variant	TP53	NM_000546.5	c.526T>A	p.Cys176Ser	2445	2383	62	2.54	89	61	28	31.46
CTDC34	5	112175348	112175348	G	T	stop_gained	APC	NM_000038.5	c.4057G>T	p.Glu1353*	3489	2877	612	17.54	54	34	20	37.04
CTDC35	5	112175423	112175423	C	T	stop_gained	APC	NM_000038.5	c.4132C>T	p.Gln1378*	4122	896	3224	78.21	512	391	121	23.63
CTDC35	17	7577085	7577085	C	T	missense_variant	TP53	NM_000546.5	c.853G>A	p.Glu285Lys	3614	1020	2594	71.78	730	592	136	18.63
CTDC36	5	112175162	112175162	C	T	stop_gained	APC	NM_000038.5	c.3871C>T	p.Gln1291*	2459	1756	701	28.51	134	56	78	58.21
CTDC36	17	7577539	7577539	G	A	missense_variant	TP53	NM_000546.5	c.742C>T	p.Arg248Trp	3265	2660	604	18.5	231	113	118	51.08
CTDC37	5	112175576	112175576	C	T	stop_gained	APC	NM_000038.5	c.4285C>T	p.Gln1429*	3428	2510	918	26.78	425	209	216	50.82
CTDC37	17	7572927	7572927	T	C	stop_lost	TP53	NM_000546.5	c.1182A>G	p.Ter394Trpext*?	2325	1692	633	27.23	400	206	194	48.5
CTDC42	5	112174466	112174466	G	T	stop_gained	APC	NM_000038.5	c.3175G>T	p.Glu1059*	1371	1350	21	1.53	1333	703	630	47.26
CTDC43	5	112175426	112175426	G	T	stop_gained	APC	NM_000038.5	c.4135G>T	p.Glu1379*	8072	6983	1085	13.44	880	625	255	28.98
CTDC45	5	112151251	112151252	CT	-	frameshift_variant	APC	NM_000038.5	c.896_897delCT	p.Ser299fs	18040	13556	4480	24.83	92	76	16	17.39
CTDC46	5	112157650	112157650	C	A	stop_gained	APC	NM_000038.5	c.1370C>A	p.Ser457*	3643	2533	1110	30.47	1502	1206	296	19.71
CTDC46	5	112175480	112175480	G	T	stop_gained	APC	NM_000038.5	c.4189G>T	p.Glu1397*	2253	1738	514	22.81	1054	852	202	19.17
CTDC46	17	7577120	7577120	C	T	missense_variant	TP53	NM_000546.5	c.818G>A	p.Arg273His	2300	1125	1175	51.09	1128	655	473	41.93
CTDC47	5	112174631	112174631	C	T	stop_gained	APC	NM_000038.5	c.3340C>T	p.Arg1114*	6318	3602	2715	42.97	1440	558	878	60.97
CTDC52	5	112175358	112175358	C	A	stop_gained	APC	NM_000038.5	c.4067C>A	p.Ser1356*	653	602	51	7.81	39	24	15	38.46
CTDC52	17	7577081	7577081	T	C	missense_variant	TP53	NM_000546.5	c.857A>G	p.Glu286Gly	1149	1090	59	5.13	118	106	12	10.17
CTDC52	17	7577551	7577551	C	A	missense_variant	TP53	NM_000546.5	c.730G>T	p.Gly244Cys	1576	1520	56	3.55	176	137	39	22.16
CTDC62	17	7578530	7578530	A	G	missense_variant	TP53	NM_000546.5	c.400T>C	p.Phe134Leu	9544	9077	466	4.88	252	225	27	10.71
CTDC63	5	112174179	112174179	-	T	frameshift_variant	APC	NM_000038.5	c.2891dupT	p.Leu964fs	2560	2363	197	7.7	526	213	313	59.51
CTDC63	17	7578479	7578479	G	A	missense_variant	TP53	NM_000546.5	c.451C>T	p.Pro151Ser	5020	4760	259	5.16	452	264	188	41.59
CTDC64	5	112136985	112136985	C	T	stop_gained	APC	NM_000038.5	c.739C>T	p.Gln247*	4760	1782	2975	62.51	168	90	78	46.43
CTDC64	17	7577022	7577022	G	A	stop_gained	TP53	NM_000546.5	c.916C>T	p.Arg306*	2562	1018	1539	60.07	51	14	37	72.55
CTDC66	5	112173917	112173917	C	T	stop_gained	APC	NM_000038.5	c.2626C>T	p.Arg876*	4879	2651	2220	45.5	1744	1184	560	32.11
CTDC66	10	89717644	89717644	-	AT	frameshift_variant	PTEN	NM_000314.4	c.674_675dupAT	p.Ser226fs	8913	4362	4488	50.35	2257	943	1309	58
CTDC66	17	7577094	7577094	G	A	missense_variant	TP53	NM_000546.5	c.844C>T	p.Arg282Trp	3223	967	2255	69.97	973	428	544	55.91
CTDC67	3	178936091	178936091	G	A	missense_variant	PIK3CA	NM_006218.2	c.1633G>A	p.Glu545Lys	3467	2157	1310	37.78	285	206	79	27.72
CTDC67	5	112155002	112155002	G	T	stop_gained	APC	NM_000038.5	c.1273G>T	p.Glu425*	6255	4086	2164	34.6	254	201	53	20.87
CTDC67	17	7577095	7577095	G	T	missense_variant	TP53	NM_000546.5	c.843C>A	p.Asp281Glu	2008	647	1359	67.68	98	64	34	34.69
CTDC69	5	112151261	112151261	C	T	stop_gained	APC	NM_000038.5	c.904C>T	p.Arg302*	5002	4696	305	6.1	1630	1006	624	38.28
CTDC69	5	112175423	112175423	C	T	stop_gained	APC	NM_000038.5	c.4132C>T	p.Gln1378*	2295	2175	120	5.23	1052	844	208	19.77
CTDC72	12	56488225	56488225	G	A	missense_variant	ERBB3	NM_001982.3	c.1744G>A	p.Gly582Arg	5072	4822	250	4.93	1294	655	639	49.38
CTDC72	17	7577141	7577141	C	T	missense_variant	TP53	NM_000546.5	c.797G>A	p.Gly266Glu	3260	3184	75	2.3	923	413	510	55.25
CTDC72	17	37879658	37879658	G	A	missense_variant	ERBB2	NM_004448.2	c.2033G>A	p.Arg678Gln	3677	3563	110	2.99	1144	793	351	30.68
CTDC73	5	112128143	112128143	C	T	stop_gained & splice_region_variant	APC	NM_000038.5	c.646C>T	p.Arg216*	3097	2901	190	6.13	827	67	760	91.9
CTDC73	17	7577120	7577120	C	T	missense_variant	TP53	NM_000546.5	c.818G>A	p.Arg273His	3897	3736	158	4.05	637	96	541	84.93
CTDC74	5	112175162	112175162	C	T	stop_gained	APC	NM_000038.5	c.3871C>T	p.Gln1291*	1620	1408	211	13.02	67	53	14	20.9
CTDC75	5	112175235	112175235	C	A	stop_gained	APC	NM_000038.5	c.3944C>A	p.Ser1315*	2337	1156	1181	50.53	754	375	379	50.27
CTDC75	17	7578199	7578199	A	C	missense_variant	TP53	NM_000546.5	c.650T>G	p.Val217Gly	2357	767	1588	67.43	822	237	585	71.17
CTDC79	10	89692905	89692905	G	A	missense_variant	PTEN	NM_000314.4	c.389G>A	p.Arg130Gln	25343	25054	268	1.06	711	181	529	74.4
CTDC81	5	112116592	112116592	C	T	stop_gained	APC	NM_000038.5	c.637C>T	p.Arg213*	4102	3629	465	11.34	1219	995	221	18.13
CTDC81	17	7577539	7577539	G	A	missense_variant	TP53	NM_000546.5	c.742C>T	p.Arg248Trp	5435	3827	1607	29.57	497	344	153	30.78
CTDC82	5	112162891	112162891	C	T	stop_gained	APC	NM_000038.5	c.1495C>T	p.Arg499*	3974	2930	1041	26.2	276	149	127	46.01
CTDC82	5	112175770	112175770	G	-	frameshift_variant	APC	NM_000038.5	c.4480delG	p.Glu1494fs	2788	2180	598	21.45	281	195	86	30.6
CTDC82	5	112179788	112179788	C	T	missense_variant	APC	NM_000038.5	c.8497C>T	p.Arg2833Cys	3372	2608	759	22.51	366	224	141	38.52
CTDC82	17	7574003	7574003	G	A	stop_gained	TP53	NM_000546.5	c.1024C>T	p.Arg342*	4039	2921	1114	27.58	192	112	80	41.67
CTDC82	17	7578263	7578263	G	A	stop_gained	TP53	NM_000546.5	c.586C>T	p.Arg196*	3719	2707	1008	27.1	323	186	137	42.41
CTDC83	5	112174282	112174282	T	A	stop_gained	APC	NM_000038.5	c.2991T>A	p.Tyr997*	2637	2097	540	20.48	668	526	142	21.26
CTDC83	17	7577074	7577074	-	T	frameshift_variant	TP53	NM_000546.5	c.863dupA	p.Asn288fs	3369	2130	1238	36.75	1011	450	561	55.49
CTDC84	5	112128143	112128143	C	T	stop_gained & splice_region_variant	APC	NM_000038.5	c.646C>T	p.Arg216*	3400	2763	630	18.53	192	149	43	22.4
CTDC84	7	116371798	116371798	G	A	missense_variant	MET	XM_005250353.1	c.1334G>A	p.Arg445His	15802	10501	5294	33.5	487	327	160	32.85
CTDC84	17	7577548	7577548	C	T	missense_variant	TP53	NM_000546.5	c.733G>A	p.Gly245Ser	4903	3120	1778	36.26	263	179	84	31.94
CTDC85	5	112175303	112175303	C	T	stop_gained	APC	NM_000038.5	c.4012C>T	p.Gln1338*	1057	1034	23	2.18	199	107	92	46.23
CTDC85	12	25398284	25398284	C	T	missense_variant	KRAS	NM_033360.2	c.35G>A	p.Gly12Asp	1335	1317	18	1.35	207	167	40	19.32
CTDC87	17	7577539	7577539	G	A	missense_variant	TP53	NM_000546.5	c.742C>T	p.Arg248Trp	3625	3139	484	13.35	334	291	43	12.87
CTDC89	3	178936095	178936095	A	G	missense_variant	PIK3CA	NM_006218.2	c.1637A>G	p.Gln546Arg	4129	4063	64	1.55	971	818	153	15.76
CTDC89	5	112176555	112176555	C	T	missense_variant	APC	NM_000038.5	c.5264C>T	p.Ala1755Val	1938	1904	30	1.55	251	175	76	30.28
CTDC90	5	112175472	112175473	AT	-	frameshift_variant	APC	NM_000038.5	c.4182_4183delTA	p.Asp1394fs	2177	2148	29	1.33	276	146	130	47.1
CTDC90	17	7577557	7577557	A	T	missense_variant	TP53	NM_000546.5	c.724T>A	p.Cys242Ser	3847	3764	80	2.08	318	146	171	53.77
CTDC92	5	112173917	112173917	C	T	stop_gained	APC	NM_000038.5	c.2626C>T	p.Arg876*	2581	489	2090	80.98	417	290	127	30.46
