# Supplementary material for: Circulating tumor DNA sequencing in colorectal cancer patients treated with first-line chemotherapy with anti-EGFR
Source: Sci Rep. 2021 Aug 11;11:16333. doi: 10.1038/s41598-021-95345-4 (PMC8358023; doi:10.1038/s41598-021-95345-4)
Supplement: Supplementary file 6 — Supplementary Table 5. [file 41598_2021_95345_MOESM6_ESM.xlsx]

## Sheet: Suppl. Table 5
ID	Chr	Pos_start	Pos_end	Ref	Alt	Mutation type	Gene	Transcript	Base change	AA change	Total reads	Ref. reads	Var. reads	VAF(%)	dbSNP	ClinVar annotation
CTDC05	12	25398284	25398284	C	A	missense_variant	KRAS	NM_033360.2	c.35G>T	p.Gly12Val	2642	2596	46	1.74	rs121913529	Pathogenic/ Likely_pathogenic
CTDC06	3	178927426	178927426	C	T	missense_variant	PIK3CA	NM_006218.2	c.1189C>T	p.Pro397Ser	1158	1133	24	2.07	NA	NA
CTDC06	3	178928249	178928249	T	A	missense_variant	PIK3CA	NM_006218.2	c.1435T>A	p.Trp479Arg	1760	1739	21	1.19	NA	NA
CTDC07	15	66727455	66727455	G	T	missense_variant	MAP2K1	NM_002755.3	c.171G>T	p.Lys57Asn	18160	17600	554	3.05	NA	Pathogenic/ Likely_pathogenic
CTDC08	17	7577548	7577548	C	T	missense_variant	TP53	NM_000546.5	c.733G>A	p.Gly245Ser	2391	2026	365	15.27	rs28934575	Pathogenic/ Likely_pathogenic
CTDC14	12	25380275	25380275	T	G	missense_variant	KRAS	NM_033360.2	c.183A>C	p.Gln61His	2885	2745	118	4.09	rs17851045	Pathogenic/ Likely_pathogenic
CTDC14	17	37866372	37866372	G	A	missense_variant	ERBB2	NM_004448.2	c.677G>A	p.Arg226His	1006	995	11	1.09	NA	NA
CTDC16	12	56490381	56490381	C	A	stop_gained	ERBB3	NM_001982.3	c.2150C>A	p.Ser717*	2462	2436	25	1.02	NA	NA
CTDC16	17	7579558	7579558	C	A	missense_variant	TP53	NM_000546.5	c.129G>T	p.Leu43Phe	2323	2282	41	1.76	NA	NA
CTDC16	17	37883587	37883587	G	T	stop_gained	ERBB2	NM_004448.2	c.3199G>T	p.Glu1067*	3143	3108	35	1.11	NA	NA
CTDC17	5	112176676	112176676	A	-	frameshift_variant	APC	NM_000038.5	c.5390delA	p.Asn1797fs	658	645	13	1.98	NA	NA
CTDC17	12	56486534	56486534	C	-	frameshift_variant	ERBB3	NM_001982.3	c.1116delC	p.Trp373fs	1046	1026	19	1.82	NA	NA
CTDC17	17	37866372	37866372	G	A	missense_variant	ERBB2	NM_004448.2	c.677G>A	p.Arg226His	1295	1277	18	1.39	NA	NA
CTDC21	5	112176740	112176740	A	-	frameshift_variant	APC	NM_000038.5	c.5453delA	p.Asn1818fs	963	951	12	1.25	NA	NA
CTDC21	17	37879588	37879588	A	G	missense_variant	ERBB2	NM_004448.2	c.1963A>G	p.Ile655Val	1330	1235	95	7.14	rs1136201	Benign
CTDC29	7	55220336	55220336	C	-	frameshift_variant	EGFR	NM_005228.3	c.730delC	p.Arg244fs	4504	4435	66	1.47	NA	NA
CTDC41	5	112175639	112175639	C	T	stop_gained	APC	NM_000038.5	c.4348C>T	p.Arg1450*	1281	788	492	38.41	rs121913332	Pathogenic/ Likely_pathogenic
CTDC41	5	112176921	112176921	A	-	frameshift_variant	APC	NM_000038.5	c.5633delA	p.Lys1878fs	1656	1636	17	1.03	NA	NA
CTDC41	17	7577144	7577144	A	C	missense_variant	TP53	NM_000546.5	c.794T>G	p.Leu265Arg	1454	748	706	48.56	NA	NA
CTDC42	3	178927413	178927413	C	A	stop_gained	PIK3CA	NM_006218.2	c.1176C>A	p.Tyr392*	515	495	19	3.69	NA	NA
CTDC42	3	178928004	178928004	A	G	missense_variant	PIK3CA	NM_006218.2	c.1282A>G	p.Asn428Asp	955	931	24	2.51	NA	NA
CTDC42	3	178937803	178937803	A	-	frameshift_variant	PIK3CA	NM_006218.2	c.1979delA	p.Asn660fs	787	771	16	2.03	NA	NA
CTDC42	5	112178180	112178180	A	T	stop_gained	APC	NM_000038.5	c.6889A>T	p.Lys2297*	740	725	15	2.03	NA	NA
CTDC42	5	112178255	112178255	C	T	stop_gained	APC	NM_000038.5	c.6964C>T	p.Gln2322*	849	837	12	1.41	NA	NA
CTDC42	5	112179489	112179489	A	-	frameshift_variant	APC	NM_000038.5	c.8202delA	p.Gly2735fs	668	656	12	1.8	NA	NA
CTDC42	5	149511579	149511579	A	T	missense_variant	PDGFRB	NM_002609.3	c.1206T>A	p.Asp402Glu	4125	4014	111	2.69	NA	NA
CTDC42	7	55272972	55272972	A	-	frameshift_variant	EGFR	NM_005228.3	c.3298delA	p.Arg1100fs	1260	1244	16	1.27	NA	NA
CTDC42	7	116371872	116371872	A	T	missense_variant	MET	XM_005250353.1	c.1408A>T	p.Thr470Ser	4227	4180	43	1.02	NA	NA
CTDC42	7	116411599	116411599	A	T	missense_variant	MET	XM_005250353.1	c.2889A>T	p.Gln963His	2900	2850	49	1.69	NA	NA
CTDC42	7	116418931	116418931	C	T	stop_gained	MET	XM_005250353.1	c.3553C>T	p.Arg1185*	3255	3194	44	1.35	NA	Uncertain_significance
CTDC42	11	533838	533838	C	T	missense_variant	HRAS	NM_001130442.1	c.218G>A	p.Arg73His	1020	996	23	2.25	NA	NA
CTDC42	12	25398284	25398284	C	A	missense_variant	KRAS	NM_033360.2	c.35G>T	p.Gly12Val	581	560	21	3.61	rs121913529	Pathogenic/ Likely_pathogenic
CTDC42	12	56495125	56495125	T	A	missense_variant	ERBB3	NM_001982.3	c.3482T>A	p.Met1161Lys	1181	1160	21	1.78	NA	NA
CTDC42	15	66777504	66777504	A	-	frameshift_variant	MAP2K1	NM_002755.3	c.871delA	p.Arg291fs	3420	3376	43	1.26	NA	NA
CTDC42	17	7577127	7577127	C	T	missense_variant	TP53	NM_000546.5	c.811G>A	p.Glu271Lys	805	697	108	13.42	NA	Uncertain_significance
CTDC42	17	7578179	7578179	C	T	missense_variant & splice_region_variant	TP53	NM_000546.5	c.670G>A	p.Glu224Lys	604	565	39	6.46	NA	Uncertain_significance
CTDC42	17	7578524	7578524	G	A	stop_gained	TP53	NM_000546.5	c.406C>T	p.Gln136*	1255	1215	40	3.19	NA	NA
CTDC42	17	37863393	37863393	A	G	missense_variant & splice_region_variant	ERBB2	NM_004448.2	c.224A>G	p.Gln75Arg	845	819	26	3.08	NA	NA
CTDC42	17	37872144	37872144	C	T	missense_variant	ERBB2	NM_004448.2	c.1465C>T	p.Pro489Ser	728	712	16	2.2	NA	NA
CTDC42	17	37884070	37884070	G	A	missense_variant	ERBB2	NM_004448.2	c.3541G>A	p.Val1181Ile	1187	1165	22	1.85	NA	NA
CTDC46	5	112176330	112176330	A	C	missense_variant	APC	NM_000038.5	c.5039A>C	p.Gln1680Pro	1660	1626	34	2.05	NA	NA
CTDC46	17	7579713	7579713	T	A	missense_variant	TP53	NM_000546.5	c.83A>T	p.Glu28Val	995	976	19	1.91	NA	Uncertain_significance
CTDC50	15	66727454	66727454	A	C	missense_variant	MAP2K1	NM_002755.3	c.170A>C	p.Lys57Thr	23241	20050	3189	13.72	NA	Likely_pathogenic
CTDC52	10	89711900	89711900	G	A	missense_variant	PTEN	NM_000314.4	c.518G>A	p.Arg173His	2851	2809	40	1.4	rs121913294	Pathogenic/ Likely_pathogenic
CTDC52	17	7579314	7579314	T	A	missense_variant & splice_region_variant	TP53	NM_000546.5	c.373A>T	p.Thr125Ser	1343	1326	17	1.27	NA	NA
CTDC58	1	115258690	115258690	T	A	missense_variant	NRAS	NM_002524.4	c.92A>T	p.Glu31Val	903	881	22	2.44	NA	NA
CTDC58	5	112043421	112043421	G	T	missense_variant	APC	NM_001127511.2	c.7G>T	p.Ala3Ser	417	404	13	3.12	NA	NA
CTDC58	5	149498310	149498310	-	T	frameshift_variant & splice_region_variant	PDGFRB	NM_002609.3	c.2903dupA	p.Lys969fs	1636	1597	37	2.26	NA	NA
CTDC58	15	66779569	66779569	A	G	missense_variant	MAP2K1	NM_002755.3	c.899A>G	p.Tyr300Cys	1438	1409	29	2.02	NA	NA
CTDC58	17	37884283	37884283	G	A	missense_variant	ERBB2	NM_004448.2	c.3754G>A	p.Asp1252Asn	991	960	31	3.13	rs184203026	NA
CTDC70	12	25398285	25398285	C	A	missense_variant	KRAS	NM_033360.2	c.34G>T	p.Gly12Cys	2669	2602	65	2.44	rs121913530	Pathogenic/ Likely_pathogenic
CTDC71	12	25398284	25398284	C	A	missense_variant	KRAS	NM_033360.2	c.35G>T	p.Gly12Val	2289	2245	44	1.92	rs121913529	Pathogenic/ Likely_pathogenic
CTDC88	5	112177901	112177901	C	T	stop_gained	APC	NM_000038.5	c.6610C>T	p.Arg2204*	3188	3086	94	2.95	NA	Likely_pathogenic
CTDC88	17	7574024	7574024	G	A	missense_variant	TP53	NM_000546.5	c.1003C>T	p.Arg335Cys	5631	5513	110	1.95	rs375444154	Uncertain_significance
